# Supplementary material for: Simultaneous enrichment optimization of glycopeptides and phosphopeptides with the highly hydrophilic DZMOF-FDP
Source: Royal Society of Chemistry journal article supplement (doi:10.1039/d2an02004a), 2023-01-01
Supplement: d2an02004a1.pdf [file d2an02004a1.pdf]

## Supporting Information

### Simultaneous enrichment optimization of glycopeptides and phosphopeptides with the highly hydrophilic DZMOF-FDP

Xiaoyu Zhou<sup>1, 2, 3</sup>, Hongyan Zhang<sup>1, 2</sup>, Li Wang<sup>1, 2</sup>, Liting Lv<sup>2</sup>, Ren'an Wu<sup>1, 2, \*</sup>

<sup>1</sup>Laboratory of High-Resolution Mass Spectrometry Technologies, Dalian Institute of Chemical Physics, Chinese Academy of Sciences, Dalian, 116023, China

<sup>2</sup>CAS Key Laboratory of Separation Science for Analytical Chemistry, Dalian Institute of Chemical Physics, Chinese Academy of Sciences, Dalian, 116023, China

<sup>3</sup>University of Chinese Academy of Sciences, Beijing 100049, China

\*Corresponding Author: Dr. Ren'an Wu

E-mail: [wurenan@dicp.ac.cn](mailto:wurenan@dicp.ac.cn) Tel: +86-411-84379828

Author Contributions: All authors have given approval to the final version of the manuscript.

---

## Table of contents

---

### Experiment details

|                        |     |
|------------------------|-----|
| Extraction of Proteins | S-3 |
| Sample Preparation     | S-4 |

### Supporting figures

|                                                                                                                                                                                                                                                                                                                  |     |
|------------------------------------------------------------------------------------------------------------------------------------------------------------------------------------------------------------------------------------------------------------------------------------------------------------------|-----|
| <b>Fig. S1 MALDI-TOF mass spectra of peptide mixtures of tryptic digests of IgG, <math>\beta</math>-casein and BSA with a molar ratio of 1:1:1000 with simultaneous enrichment by DZMOF-FDP. The red stars indicate glycopeptides. The blue bullets indicate phosphopeptides and dephosphorylated fragments.</b> | S-5 |
|------------------------------------------------------------------------------------------------------------------------------------------------------------------------------------------------------------------------------------------------------------------------------------------------------------------|-----|

|                                                                                                                                                                                                     |     |
|-----------------------------------------------------------------------------------------------------------------------------------------------------------------------------------------------------|-----|
| <b>Fig. S2</b> Venn diagrams of (a) identified unique glycosylation sites and (b) identified unique phosphorylation sites. Motif analysis of (c) glycosylation sites and (d) phosphorylation sites. | S-6 |
|-----------------------------------------------------------------------------------------------------------------------------------------------------------------------------------------------------|-----|

### Supporting tables

|                                                                                               |      |
|-----------------------------------------------------------------------------------------------|------|
| <b>Table S1</b> The identified glycopeptides from human IgG digests treated with DZMOF-FDP.   | S-7  |
| <b>Table S2</b> N-glycopeptides enriched by DZMOF-FDP from HeLa cell proteins tryptic digest. | S-9  |
| <b>Table S3</b> Phosphopeptides enriched by DZMOF-FDP from HeLa cell proteins tryptic digest. | S-56 |

---

## **Experiment details**

### **Extraction of Proteins**

Human HeLa cell was cultured in RPMI 1640 medium, supplemented with 1% penicillin/streptomycin and 10% new born bovine serum at 37 °C in 5% CO<sub>2</sub> atmosphere. Cells were harvested when grown to around 80% density. The obtained cell pellets were scraped in an ice-cold lysis buffer, which contained 8 M urea, 50 mM Tris-HCl (pH 7.4), 65 mM DTT, 1 mM EDTA, 0.5 mM EGTA, phosphatase inhibitor, 2% protease inhibitor cocktail and 1% Triton X-100. The obtained solution was sonicated for 25 min and then centrifuged at 25,000 g at 4 °C for 30 min. Next, the supernatant was treated by five volumes of ice-cold precipitation solution (ethanol/acetone/acetic acid = 50/50/0.1), and was placed at -20 °C overnight for precipitation of proteins. The suspension was centrifuged at 20,000 g at 4 °C for 30 min and get the precipitated proteins. The protein concentration was detected by BCA assay and lyophilized before use.

## Sample Preparation

For the digestion of  $\beta$ -casein or  $\alpha$ -casein, the protein was dissolved in 100 mM  $\text{NH}_4\text{HCO}_3$  buffer (2 mg/mL) to form a substrate solution and digested at 37 °C for 16 h with trypsin at the enzyme-to-substrate ratio of 1:40 (w/w). For the digestion of IgG or BSA, the standard protein was firstly dissolved in a buffer (8 M urea, 100 mM  $\text{NH}_4\text{HCO}_3$ ). The dissolved standard protein (2 mg/mL) was reduced by DTT at 60 °C for 1 h, and then, alkylated by iodoacetamide (IAA) at room temperature for 45 min in the dark. The resulting solution was diluted to 1 M urea by 100 mM  $\text{NH}_4\text{HCO}_3$  and digested by trypsin with a mass ratio of trypsin to stand protein at 1:25 (w/w) for 16 h at 37 °C. The obtained digests were kept at -80 °C for further use.

HeLa cells were digested as following protocol: firstly, the obtained HeLa cell lysate protein was dissolved in a solution containing 8 M urea and 50 mM  $\text{NH}_4\text{HCO}_3$  (pH = 8.0). Then they were reduced by 20 mM DTT at 37 °C for 2 h. After alkylation by 40 mM IAA at room temperature in darkness for 45 min, concentration of urea of the solution was diluted to 1 M by 50 mM Tris-HCl (pH = 7.8). Subsequently, the solution was treated with trypsin overnight at 37 °C with an enzyme-to-protein ratio of 1/25 (w/w). Finally, the samples were all lyophilized and stored at -20 °C for further analysis.

## Supporting figures

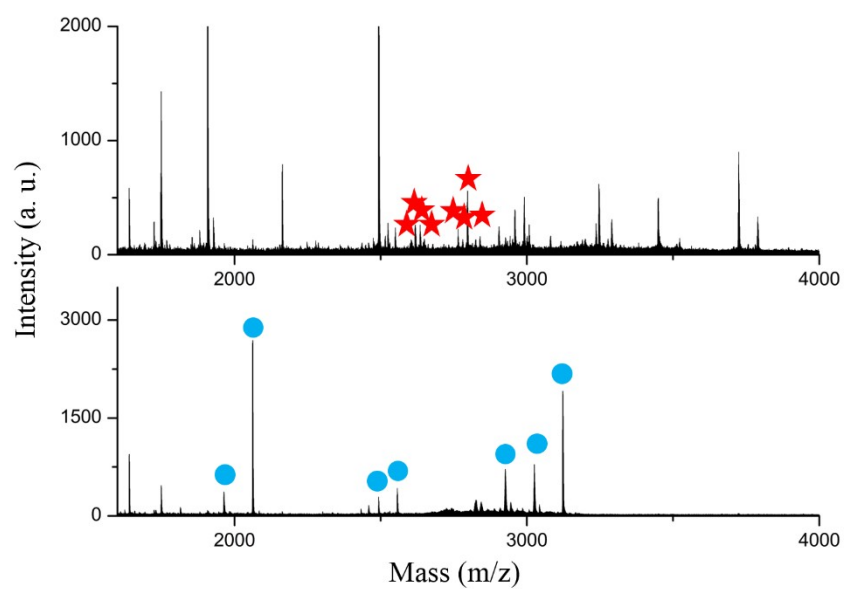

**Fig. S1** MALDI-TOF mass spectra of peptide mixtures of tryptic digests of IgG,  $\beta$ -casein and BSA with a molar ratio of 1:1:1000 with simultaneous enrichment by DZMOF-FDP. The red stars indicate glycopeptides. The blue bullets indicate phosphopeptides and their dephosphorylated fragments.

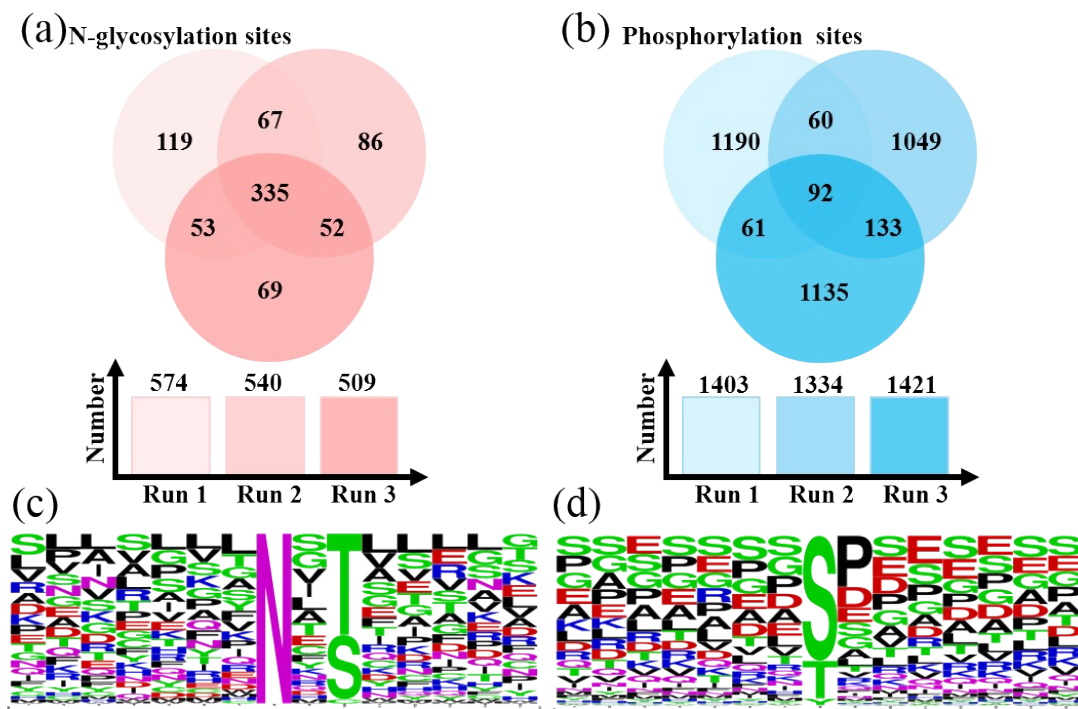

**Fig. S2** Venn diagrams of (a) identified unique glycosylation sites and (b) identified unique phosphorylation sites. Motif analysis of (c) glycosylation sites and (d) phosphorylation sites.

## Supporting tables

**Table S1** The identified glycopeptides from human IgG digests treated with DZMOF-FDP.

| No. | m/z    | Glycan composition            | Amino acid sequence |
|-----|--------|-------------------------------|---------------------|
| I1  | 1506.0 | [HexNAc]1[Fuc]1               | EEQFN*STFR          |
| I2  | 1538.4 | [HexNAc]1[Fuc]1               | EEQYN*STYR          |
| I3  | 2235.3 | [Hex]2[HexNAc]3[Fuc]1         | EEQFN*STFR          |
| I4  | 2268.0 | [Hex]2[HexNAc]3[Fuc]1         | EEQYN*STYR          |
| I5  | 2397.9 | [Hex]3[HexNAc]3[Fuc]1         | EEQFN*STFR          |
| I6  | 2429.8 | [Hex]3[HexNAc]3[Fuc]1         | EEQYN*STYR          |
| I7  | 2455.9 | [Hex]3[HexNAc]4               | EEQFN*STFR          |
| I8  | 2486.9 | [Hex]3[HexNAc]4               | EEQYN*STYR          |
| I9  | 2589.8 | [Hex]4[HexNAc]3[Fuc]1         | EEQFN*STFR          |
| I10 | 2591.9 | [Hex]4[HexNAc]3[Fuc]1         | EEQYN*STYR          |
| I11 | 2601.6 | [Hex]3[HexNAc]4[Fuc]1         | EEQFN*STFR          |
| I12 | 2617.5 | [Hex]4[HexNAc]4               | EEQFN*STFR          |
| I13 | 2633.6 | [Hex]3[HexNAc]4[Fuc]1         | EEQYN*STYR          |
| I14 | 2649.6 | [Hex]4[HexNAc]4               | EEQYN*STYR          |
| I15 | 2689.8 | [Hex]3[HexNAc]5               | EEQYN*STYR          |
| I16 | 2763.6 | [Hex]4[HexNAc]4[Fuc]1         | EEQFN*STFR          |
| I17 | 2779.8 | [Hex]5[HexNAc]4               | EEQFN*STFR          |
| I18 | 2795.6 | [Hex]4[HexNAc]4[Fuc]1         | EEQYN*STYR          |
| I19 | 2804.7 | [Hex]3[HexNAc]5[Fuc]1         | EEQFN*STFR          |
| I20 | 2810.8 | [Hex]5[HexNAc]4               | EEQYN*STYR          |
| I21 | 2837.6 | [Hex]3[HexNAc]5[Fuc]1         | EEQYN*STYR          |
| I22 | 2853.5 | [Hex]4[HexNAc]5               | EEQYN*STYR          |
| I23 | 2925.7 | [Hex]5[HexNAc]4[Fuc]1         | EEQFN*STFR          |
| I24 | 2941.5 | [Hex]5[HexNAc]4[Fuc]1         | EEQFN*STYR          |
| I25 | 2957.6 | [Hex]5[HexNAc]4[Fuc]1         | EEQYN*STYR          |
| I26 | 2966.7 | [Hex]4[HexNAc]5[Fuc]1         | EEQFN*STFR          |
| I27 | 2998.7 | [Hex]4[HexNAc]5[Fuc]1         | EEQYN*STYR          |
| I28 | 3084.8 | [Hex]4[HexNAc]4[Fuc]1[NeuAc]1 | EEQYN*STYR          |

|     |        |                       |                |
|-----|--------|-----------------------|----------------|
| I29 | 3130.8 | [Hex]5[HexNAc]5[Fuc]1 | EEQFN*STFR     |
| I30 | 3160.6 | [Hex]5[HexNAc]5[Fuc]1 | EEQYN*STYR     |
| I31 | 3205.1 | [Hex]5[HexNAc]3[Fuc]1 | TKPREEQFN*STFR |
| I32 | 3246.6 | [Hex]4[HexNAc]4[Fuc]1 | TKPREEQFN*STFR |
| I33 | 3278.8 | [Hex]4[HexNAc]4[Fuc]1 | TKPREEQYN*STYR |
| I34 | 3407.7 | [Hex]5[HexNAc]4[Fuc]1 | TKPREEQFN*STFR |
| I35 | 3441.7 | [Hex]5[HexNAc]4[Fuc]1 | TKPREEQYN*STYR |
| I36 | 3481.2 | [Hex]4[HexNAc]5[Fuc]1 | TKPREEQYN*STYR |

---

The N-glycosylation sites are marked with N\*. HexNAc=N-acetylglucosamine, Hex=mannose, Fuc=fucose, NeuAc=sialic.



**Table S2** N-glycopeptides enriched by DZMOF-FDP from HeLa cell proteins tryptic digest

| No. | Protein              | Peptide sequence                                             | N-glycated site |
|-----|----------------------|--------------------------------------------------------------|-----------------|
| 1   | A0A024RCL3_<br>HUMAN | R.SEASEGN*ITVTCR.A                                           | N123            |
| 2   | A0A087WT78_<br>HUMAN | K.HNN*DTQHIWESDSNEFSVIADPR.G                                 | N217            |
| 3   | A0A087WTB7_<br>HUMAN | K.QLQGIPSSSHVSNN*M#STPVLPAPTA<br>APGN^TGMVQ^GPSSGNTSSSSHSK.A | N32             |
| 4   | A0A087WTK0_<br>HUMAN | R.KAALSWSN^GN*GTASCR.V                                       | N231            |
| 5   | A0A087WTK0_<br>HUMAN | K.IHVAGETDSSNLN*VSEPR.A                                      | N413            |
| 6   | A0A087WTK0_<br>HUMAN | R.YN*ATVYSQAAN*GTEGQPQAIEFR.T                                | N342N351        |
| 7   | A0A087WTK0_<br>HUMAN | R.NTCTTGITDPPPPDGSPN*ITSVSHNSV<br>K.V                        | N824            |
| 8   | A0A087WTK0_<br>HUMAN | R.SSTFYN*ITVCPVLGDIEGTPGFLQ^VH<br>TPPVPVSDFR.V               | N431            |
| 9   | A0A087WTK0_<br>HUMAN | R.ACVAGFTN*ITFHPQNK.G                                        | N937            |
| 10  | A0A087WTK0_<br>HUMAN | R.NTCTTGITDPPPPDGSPN*ITSVSHN^S<br>VK.V                       | N824            |
| 11  | A0A087WTK0_<br>HUMAN | R.SSTFYN*ITVCPVLGDIEGTPGFLQVHT<br>PPVPVSDFR.V                | N431            |
| 12  | A0A087WU02_<br>HUMAN | R.GHAHLAALVNHESYN*FSHR.I                                     | N221            |
| 13  | A0A087WU13_<br>HUMAN | K.AIHVALN*CCGLAGGVEQFISDICPK.K                               | N178            |
| 14  | A0A087WV34_<br>HUMAN | R.TFAN*GSLAFR.V                                              | N101            |
| 15  | A0A087WVP1_<br>HUMAN | K.TGALTVQN*TTQLR.S                                           | N1942           |
| 16  | A0A087WVQ9_<br>HUMAN | R.KDGN*ASGTTLLEALDCILPPTPTDK<br>PLRLPLQDVYK.I                | N219            |
| 17  | A0A087WW26_<br>HUMAN | K.MQLFLFISILAHQCDFRANPN^EPAKM<br>#N*FSYGLTIKPK.S             | N133            |
| 18  | A0A087WWP4_<br>HUMAN | K.LGGSGGSN*GSSSGK.T                                          | N37             |
| 19  | A0A087WXM8_<br>HUMAN | K.VLSLPLN*SSAVVN*CSVHGLPTPALR.                               | N377N383        |

|    |                       |                                                                       |          |
|----|-----------------------|-----------------------------------------------------------------------|----------|
|    | HUMAN                 | W                                                                     |          |
| 20 | A0A087WYV6_<br>HUMAN  | K.QYN*STGDYR.S                                                        | N46      |
| 21 | A0A087WZ85_<br>HUMAN  | R.NYLGEAVSHN*ASLEVAILR.D                                              | N41      |
| 22 | A0A087WZ85_<br>HUMAN  | K.VWCLGN*ETR.Y                                                        | N703     |
| 23 | A0A087X0T8_<br>UMAN   | R.FQLLN*FSSSELK.V                                                     | N60      |
| 24 | A0A087X117_<br>UMAN   | R.ENVGIYN*LSK.G                                                       | N618     |
| 25 | A0A087X117_<br>UMAN   | R.VTNSNANAASPLIVAGYN*VSGSVR.S                                         | N218     |
| 26 | A0A087X208_<br>UMAN   | R.GPTFAPLPPVAPLHCAQTPYGCCQDN*<br>ITAAR.G                              | N639     |
| 27 | A0A087X208_<br>UMAN   | R.GPTFAPLPPVAPLHCAQTPYGCCQ^DN<br>*ITAAR.G                             | N639     |
| 28 | A0A087X2C4_<br>HUMAN  | R.LVVQVNDSGQPSQSTTTLVHVFVN*E<br>SVSN*ATAIDSQ^IAR.S                    | N155N160 |
| 29 | A0A087X2C4_<br>HUMAN  | R.LVVQVNDSGQPSQ^STTTLVHVFVN*E<br>SVSN*ATAIDSQIAR.S                    | N155N160 |
| 30 | A0A0A0MQS9_<br>HUMAN  | K.RPASN*VSASIQR.I                                                     | N810     |
| 31 | A0A0A0MRM9_<br>_HUMAN | K.N*SSNKPAVTTK.S                                                      | N395     |
| 32 | A0A0A0MSA9_<br>HUMAN  | R.SNPEPTGYNWSTTMGPLPPFAVAQGA<br>Q^LLIRPVDKPIN*TTLICN*VTN^ALGAR<br>.Q  | N307N313 |
| 33 | A0A0A0MSA9_<br>HUMAN  | R.SNPEPTGYNWSTTM#GPLPPFAVAQG<br>AQ^LLIRPVDKPIN*TTLICN*VTN^ALGA<br>R.Q | N307N313 |
| 34 | A0A0A0MSM0_<br>HUMAN  | R.FVVQ^N*VSAQK.D                                                      | N390     |
| 35 | A0A0A0MST8_<br>HUMAN  | K.KDN*ITAHNISWR.N                                                     | N771     |
| 36 | A0A0A0MTC1_<br>HUMAN  | R.LQ^N*FSR.I                                                          | N3876    |
| 37 | A0A0A0MTJ9_<br>HUMAN  | R.LN*WTSLLPASFTK.N                                                    | N327     |
| 38 | A0A0A0MTJ9_<br>HUMAN  | K.GNYDFVQAMIVNN*HTSLDVVEEAAA<br>VR.A                                  | N310     |

|    |                      |                                           |          |
|----|----------------------|-------------------------------------------|----------|
| 39 | A0A0A0MTJ9_<br>HUMAN | K.GNYDFVQAM#IVNN*HTSLDVVEEAAA<br>VR.A     | N310     |
| 40 | A0A0A0MTU3_<br>HUMAN | K.VFKPPSSTEALN*DSQEFPPETPTK.V             | N189     |
| 41 | A0A0C4DG87_<br>HUMAN | R.LHNQLLPN*VTTVER.N                       | N167     |
| 42 | A0A0C4DGX8_<br>HUMAN | K.QPVSPVIHPPVSYN*DTAPR.I                  | N133     |
| 43 | A0A0G2JIW1_<br>HUMAN | R.N*STIPTK.Q                              | N418     |
| 44 | A0A0G2JIW1_<br>HUMAN | R.N*STIPTKQTQIFTTYSDNQPGVLIQ^V<br>YEGER.A | N418     |
| 45 | A0A0G2JK11_H<br>UMAN | R.AKPQGQWAEDVLGN*KTWDRETR.D               | N79      |
| 46 | A0A0G2JLB3_<br>HUMAN | R.DLGPTLAN*STHHNVR.L                      | N309     |
| 47 | A0A0G2JLB3_<br>HUMAN | R.M#ELSM#GPIQAN*HTGTGLLLTLQPE<br>QK.F     | N98      |
| 48 | A0A0G2JLB3_<br>HUMAN | R.RM#ELSM#GPIQAN*HTGTGLLLTLQP<br>EQK.F    | N98      |
| 49 | A0A0G2JLB3_<br>HUMAN | R.MELSMGPIQAN*HTGTGLLLTLQPEQ<br>K.F       | N98      |
| 50 | A0A0G2JLB3_<br>HUMAN | R.TYTYADTPDDFQLHN*FSLPEEDTK.L             | N185     |
| 51 | A0A0G2JLB3_<br>HUMAN | R.RMELSMGPIQAN*HTGTGLLLTLQPE<br>QK.F      | N98      |
| 52 | A0A0G2JLI4_H<br>UMAN | K.TQNGVYSAAN*YTN*GSFGSNFVSAGI<br>QTSFR.T  | N434N437 |
| 53 | A0A0G2JNW7_<br>HUMAN | K.SAFDPPDIPVCLLGN*R.T                     | N312     |
| 54 | A0A0G2JNZ5_<br>HUMAN | -<br>.M#ELSM#GPIQAN*HTGTGLLLTLQPEQ<br>K.F | N11      |
| 55 | A0A0G2JNZ5_<br>HUMAN | -<br>.MELSMGPIQAN*HTGTGLLLTLQPEQK.<br>F   | N11      |
| 56 | A0A0J9YXA3_<br>HUMAN | R.VN*CSVYVQLEK.V                          | N83      |
| 57 | A0A0J9YXF2_<br>HUMAN | K.HTNM#N*LTQLK.V                          | N275     |
| 58 | A0A0J9YXF2_<br>HUMAN | R.IQNILSEKPTVTTVYANN*GSVLQGSS             | N344     |

|    |                      |                                              |          |
|----|----------------------|----------------------------------------------|----------|
|    | HUMAN                | VASVYDGK.L                                   |          |
| 59 | A0A0J9YXF2_<br>HUMAN | R.IQNILSEKPTVTTVYANN*GSVLQ^GSS<br>VASVYDGK.L | N344     |
| 60 | A0A0J9YYJ1_<br>UMAN  | K.HTNM#N*LTQLK.I                             | N107     |
| 61 | A0A0R4J2F2_<br>UMAN  | R.SPVQEN*SSDLNK.S                            | N65      |
| 62 | A0A0R4J2F2_<br>UMAN  | R.YN*GTVGLWR.R                               | N95      |
| 63 | A0A0S2Z3I2_<br>UMAN  | K.SN*ITFNNN*DTVSFLEYR.T                      | N102N108 |
| 64 | A0A0S2Z3I2_<br>UMAN  | R.HKSNITFNN^N*DTVSFLEYR.T                    | N108     |
| 65 | A0A0S2Z3I2_<br>UMAN  | R.HKSN*ITFN^NN*DTVSFLEYR.T                   | N102N108 |
| 66 | A0A0S2Z3I2_<br>UMAN  | R.HKSN*ITFN^N^N*DTVSFLEYR.T                  | N102N108 |
| 67 | A0A0S2Z3I2_<br>UMAN  | R.HKSNITFNNN*DTVSFLEYR.T                     | N108     |
| 68 | A0A0S2Z3I2_<br>UMAN  | R.HKSN*ITFNN^NDTVSFLEYR.T                    | N102     |
| 69 | A0A0S2Z3I2_<br>UMAN  | R.HKSN*ITFNNN*DTVSFLEYR.T                    | N102N108 |
| 70 | A0A0S2Z3I2_<br>UMAN  | R.HKSNITFN^N^N*DTVSFLEYR.T                   | N108     |
| 71 | A0A0U1RQT9_<br>HUMAN | K.GQTEIQVNCPPAVTEN*K.T                       | N31      |
| 72 | A0A0U1RQT9_<br>HUMAN | R.LNEASFQPPPGVN*ICDVNWK.D                    | N56      |
| 73 | A0A140T912_<br>UMAN  | R.GYYN*QSEAGSHTLQWMYGCDLGP<br>GR.L           | N110     |
| 74 | A0A140T912_<br>UMAN  | R.GYYN*QSEAGSHTLQWM#YGCDLGP<br>DGR.L         | N110     |
| 75 | A0A140T9K6_<br>UMAN  | K.TVTSASNN*ETYCR.S                           | N192     |
| 76 | A0A1B0GTM3_<br>HUMAN | R.TVLEN*STSYEEAK.N                           | N240     |
| 77 | A0A1B0GU03_<br>HUMAN | K.GSLSYLN*VTR.K                              | N263     |
| 78 | A0A1B0GU03_<br>HUMAN | K.GSLSYLN*VTRK.A                             | N263     |

|    |                      |                                                  |          |
|----|----------------------|--------------------------------------------------|----------|
| 79 | A0A1B0GU03_<br>HUMAN | K.YYKGSLSYLN*VTR.K                               | N263     |
| 80 | A0A1B0GV47_<br>HUMAN | R.LTVSQGN*TSVQQ^DK.S                             | N1274    |
| 81 | A0A1W2PNP0_<br>HUMAN | R.VYVDITTYNQDN*ETLEVHPPPTTTYQ<br>^DVILGTR.K      | N293     |
| 82 | A0A1W2PNP0_<br>HUMAN | R.VYVDITTYN^Q^DN*ETLEVHPPPTTT<br>YQDVILGTR.K     | N293     |
| 83 | A0A1W2PNP0_<br>HUMAN | R.KTYAIYDLLDTAMIN*NSR.N                          | N329     |
| 84 | A0A1W2PNP0_<br>HUMAN | R.VYVDITTYNQDN*ETLEVHPPPTTTYQ<br>DVILGTR.K       | N293     |
| 85 | A0A1W2PNP0_<br>HUMAN | R.VYVDITTYN^QDN*ETLEVHPPPTTTY<br>QDVILGTR.K      | N293     |
| 86 | A0A1W2PPN1_<br>HUMAN | R.VCEIHEDN*STR.S                                 | N133     |
| 87 | A0A1W2PPU6_<br>HUMAN | K.ANIQFGDN*GTTISAVSNK.A                          | N105     |
| 88 | A0A1W2PPU6_<br>HUMAN | R.NKANIQFGDN*GTTISAVSNK.A                        | N105     |
| 89 | A0A1W2PPU6_<br>HUMAN | R.TMVFPVMYLN*ESVHIDKETASR.L                      | N372     |
| 90 | A0A1W2PPU6_<br>HUMAN | R.TM#VFPVMYLN*ESVHIDKETASR.L                     | N372     |
| 91 | A0A1W2PPU6_<br>HUMAN | R.TM#VFPVM#YLN*ESVHIDKETASR.L                    | N372     |
| 92 | A0A1W2PPU6_<br>HUMAN | R.YKVP AEILANTSDNAGFCIPEGN^CLG<br>SGVLN*VSICK.N  | N285     |
| 93 | A0A1W2PPU6_<br>HUMAN | R.YKVP AEILAN*TSDN^AGFCIPEGNCL<br>GSGVLNVSICK.N  | N264     |
| 94 | A0A1W2PPU6_<br>HUMAN | R.YKVP AEILAN*TSDNAGFCIPEGNCLG<br>SGVLN*VSICK.N  | N264N285 |
| 95 | A0A1W2PPU6_<br>HUMAN | R.YKVP AEILANTSDN^AGFCIPEGN^CL<br>GSGVLN*VSICK.N | N285     |
| 96 | A0A1W2PPU6_<br>HUMAN | R.YKVP AEILAN*TSDNAGFCIPEGN^CL<br>GSGVLN*VSICK.N | N264N285 |
| 97 | A0A1W2PPU6_<br>HUMAN | R.YKVP AEILANTSDN^AGFCIPEGNCLG<br>SGVLN*VSICK.N  | N285     |
| 98 | A0A1W2PPU6_<br>HUMAN | R.YKVP AEILAN*TSDN^AGFCIPEGNCL<br>GSGVLN*VSICK.N | N264N285 |
| 99 | A0A1W2PQB7_<br>HUMAN | K.TSLDWWITDKCNMIN*GTDGDSFHPLI                    | N249     |

|     |                      |                                                      |          |
|-----|----------------------|------------------------------------------------------|----------|
|     | HUMAN                | TK.D                                                 |          |
| 100 | A0A1W2PQB7_<br>HUMAN | R.YKVP AEILAN*TSDN^AGFCIPEGN^CL<br>GSGVLN*VSICK.N    | N304N325 |
| 101 | A0A286YES4_<br>HUMAN | R.LRPHFLSVCN^PDFSQIN*CSEGYIQNY<br>R.C                | N52      |
| 102 | A0A286YES4_<br>HUMAN | R.LRPHFLSVCNPDFSQIN*CSEGYIQNYR<br>.C                 | N52      |
| 103 | A0A286YFE3_<br>HUMAN | R.N*HSIFLADINQR.G                                    | N197     |
| 104 | A0A286YFE3_<br>HUMAN | R.GIN*ESYKK.N                                        | N212     |
| 105 | A0A286YFE3_<br>HUMAN | K.FLN*DSIVDPVDSEWFGFYR.S                             | N232     |
| 106 | A0A286YFJ8_H<br>UMAN | R.EEQFN*STYR.V                                       | N177     |
| 107 | A0A286YFJ8_H<br>UMAN | K.TKPREEQFN*STYR.V                                   | N177     |
| 108 | A0A2R8Y484_<br>HUMAN | R.DIYTFDGALN*K.S                                     | N28      |
| 109 | A0A2R8Y484_<br>HUMAN | K.SDAVSHTGN*YTCEVTELTR.E                             | N66      |
| 110 | A0A2R8Y484_<br>HUMAN | K.M#DKSDAVSHTGN*YTCEVTELTR.E                         | N66      |
| 111 | A0A2R8Y484_<br>HUMAN | K.GRDIYTFDGALN*K.S                                   | N28      |
| 112 | A0A2R8Y484_<br>HUMAN | K.MDKSDAVSHTGN*YTCEVTELTR.E                          | N66      |
| 113 | A0A2R8Y567_<br>HUMAN | R.LDMSQN*VSLVTAELSK.D                                | N48      |
| 114 | A0A2R8Y5Y7_<br>HUMAN | R.SVYAHFPINVVIQEN*GSLVEIR.N                          | N136     |
| 115 | A0A2R8Y5Y7_<br>HUMAN | R.SVYAHFPIN^VVIQEN*GSLVEIR.N                         | N136     |
| 116 | A0A2R8Y7U1_<br>HUMAN | K.FLSSSPHLPSSYFN*ASGR.A                              | N280     |
| 117 | A0A2R8Y811_<br>HUMAN | K.KEEQVISLGPQVAEGENVFGVCHIFAS<br>FN*DTFVHVTDLSGK.E   | N38      |
| 118 | A0A2R8Y811_<br>HUMAN | K.EKKEEQVISLGPQVAEGENVFGVCHIF<br>ASFN*DTFVHVTDLSGK.E | N38      |
| 119 | A0A2U3TZL5_<br>HUMAN | K.TAVN*CSSDFDACLITK.A                                | N43      |

|     |                      |                                          |          |
|-----|----------------------|------------------------------------------|----------|
| 120 | A0A3B3IRL2_H<br>UMAN | K.LN*ITNIWVLDYFGGPK.I                    | N193     |
| 121 | A0A3B3IRP0_H<br>UMAN | R.VESGEN*CSSPAPR.E                       | N1302    |
| 122 | A0A3B3IRT8_H<br>UMAN | R.YPQDYQFYIQN*FTALPLNTVVPPQR.<br>Q       | N136     |
| 123 | A0A3B3IRT8_H<br>UMAN | R.YPQDYQ^FYIQN*FTALPLNTVVPPQR.<br>Q      | N136     |
| 124 | A0A3B3ISF9_H<br>UMAN | R.FFN*FSWR.V                             | N523     |
| 125 | A0A3B3ISF9_H<br>UMAN | R.LGGWN*ITGPWAK.D                        | N194     |
| 126 | A0A3B3ISF9_H<br>UMAN | R.DYYLN*KTENEK.V                         | N254     |
| 127 | A0A3B3ISF9_H<br>UMAN | R.ACMN*ETRIEELR.A                        | N171     |
| 128 | A0A3B3ISF9_H<br>UMAN | R.ACM#N*ETRIEELR.A                       | N171     |
| 129 | A0A3B3ISF9_H<br>UMAN | K.HLLEN*STASVSEAER.K                     | N150     |
| 130 | A0A3B3ISF9_H<br>UMAN | K.HLLEN*STASVSEAERK.A                    | N150     |
| 131 | A0A3B3ISF9_H<br>UMAN | K.NSNSNVIQVDQ^SGLGLPSRDYYLN*K<br>TENEK.V | N254     |
| 132 | A0A3B3ISF9_H<br>UMAN | K.NSNSNVIQVDQSGLGLPSRDYYLN*K<br>TEN^EK.V | N254     |
| 133 | A0A3B3ITW3_<br>HUMAN | R.SGANVLCGPN*GCGK.S                      | N475     |
| 134 | A0A3B3IUC4_<br>HUMAN | K.LGIYADVGN*K.T                          | N180     |
| 135 | A0A3B3IUC4_<br>HUMAN | R.SIVYSCEWPLYMWPQKPN*YTEIR.Q             | N256     |
| 136 | A0A3B3IUC4_<br>HUMAN | R.SIVYSCEWPLYMWPQ^KPN*YTEIR.<br>Q        | N256     |
| 137 | A0A494BZU0_<br>HUMAN | K.SHLQN*YTVN*ATK.L                       | N379N383 |
| 138 | A0A494C016_H<br>UMAN | R.IN*GCAIQCR.V                           | N370     |
| 139 | A0A494C039_H<br>UMAN | K.VIN*ETWAWK.N                           | N862     |
| 140 | A0A494C039_H         | R.VFGSQN*LTTVK.L                         | N515     |

|     |                      |                                                                              |          |
|-----|----------------------|------------------------------------------------------------------------------|----------|
|     | UMAN                 |                                                                              |          |
| 141 | A0A494C039_H<br>UMAN | R.AEPPLN*ASASDQGEK.V                                                         | N931     |
| 142 | A0A494C039_H<br>UMAN | R.LSALDNLLN*HSSMFLK.G                                                        | N830     |
| 143 | A0A494C039_H<br>UMAN | R.LSALDNLLN*HSSM#FLK.G                                                       | N830     |
| 144 | A0A494C039_H<br>UMAN | K.VIN*ETWAWKN*ATLAEQAK.L                                                     | N862N869 |
| 145 | A0A494C039_H<br>UMAN | K.DKN*GTRAEPPLN*ASASDQGEK.V                                                  | N922N931 |
| 146 | A0A494C039_H<br>UMAN | K.N*ATLAEQAKLPATEKPVLLSK.D                                                   | N869     |
| 147 | A0A494C039_H<br>UMAN | R.QTVHFQISSQLQFSPEEVLGMVLN*YS<br>R.S                                         | N155     |
| 148 | A0A494C039_H<br>UMAN | K.N*ATLAEQAK.L                                                               | N869     |
| 149 | A0A494C1B1_H<br>UMAN | K.GQVYPWGNWFQPN*R.T                                                          | N195     |
| 150 | A0A494C1F2_H<br>UMAN | K.ESSQ^PDAFSSGGGSKPSYEAIPESSPPS<br>GITSASN*TTPGEPAASSSRPVAPSGTAL<br>STTSSK.L | N1270    |
| 151 | A0A494C1K3_<br>HUMAN | R.TPTQTN*GSNVPFKPR.G                                                         | N869     |
| 152 | A0A5F9ZH40_<br>HUMAN | R.FNPN*ISWQPIPVHTVPITEDR.S                                                   | N133     |
| 153 | A0A5F9ZH94_<br>HUMAN | R.FMGDMVSFEEDRIN*ATVWK.L                                                     | N234     |
| 154 | A0A5F9ZH94_<br>HUMAN | R.LLLVDFSSQALFQDKN*SSQVLGEK.V                                                | N303     |
| 155 | A0A5F9ZH94_<br>HUMAN | K.N*VTLQ^CVFWVEDPTLSSPGHWSSA<br>GCETVR.R                                     | N341     |
| 156 | A0A5F9ZH94_<br>HUMAN | R.FM#GDM#VSFEEDRIN*ATVWK.L                                                   | N234     |
| 157 | A0A5F9ZHR7_<br>HUMAN | R.YHGFLN*TSYHR.Q                                                             | N92      |
| 158 | A0A5F9ZHR7_<br>HUMAN | R.NAQFLDMVAN*ETGLTDLTLETVWN<br>VYDTLFCEQ^THGLR.L                             | N191     |
| 159 | A0A5F9ZHR7_<br>HUMAN | R.NAQ^FLDMVAN*ETGLTDLTLETVWN<br>VYDTLFCEQ^THGLR.L                            | N191     |
| 160 | A0A5F9ZHR7_<br>HUMAN | R.NAQ^FLDMVAN*ETGLTDLTLETVWN                                                 | N191     |



|     |              |                                   |          |
|-----|--------------|-----------------------------------|----------|
|     | HUMAN        | ^VYDTLFCEQTHGLR.L                 |          |
| 161 | A0A5F9ZHR7_  | R.NAQ^FLDMVAN*ETGLTDLTLETVWN      |          |
|     | HUMAN        | ^VYDTLFCEQ^THGLR.L                | N191     |
| 162 | A0A5F9ZHR7_  | R.QTPEYQN*ESSR.N                  | N177     |
|     | HUMAN        |                                   |          |
| 163 | A0A5F9ZHR7_  | R.FNPN*ISWQIPVHTVPITEDR.L         | N133     |
|     | HUMAN        |                                   |          |
| 164 | A0A669KBE6_  | R.YSLN*VTYNYPVHYFDGR.K            | N258     |
|     | HUMAN        |                                   |          |
| 165 | A0A669KBJ7_H | R.SQAPARYSLQ^SAN*ASSLSSGQLK.S     | N470     |
|     | UMAN         |                                   |          |
| 166 | A0A6Q8PF58_H | K.SN*ISILR.V                      | N607     |
|     | UMAN         |                                   |          |
| 167 | A0A6Q8PF58_H | K.FLEAGIYEVPIIITDSGNPPKSN*ISILR.  |          |
|     | UMAN         | V                                 | N607     |
| 168 | A0A6Q8PF58_H | K.IKFLEAGIYEVPIIITDSGNPPKSN*ISIL  |          |
|     | UMAN         | R.V                               | N607     |
| 169 | A0A6Q8PF58_H | K.IKFLEAGIYEVPIIITDSGN^PPKSN*ISIL |          |
|     | UMAN         | R.V                               | N607     |
| 170 | A0A6Q8PF58_H | R.IVSQAPSTPSPNM#FTIN^N*ETGDIITV   |          |
|     | UMAN         | AAGLDREK.V                        | N240     |
| 171 | A0A6Q8PF58_H | K.RN*WTITR.L                      | N566     |
|     | UMAN         |                                   |          |
| 172 | A0A7I2V2E0_H | R.GFCSADGSDPLWDWN*VTWN*TSNP       |          |
|     | UMAN         | DFTK.C                            | N19N23   |
| 173 | A0A7I2V2E1_H | R.GLLHLEN*ASYGIEPLQN*SSHFEHIIY    |          |
|     | UMAN         | R.M                               | N144N154 |
| 174 | A0A7I2V2E1_H | R.N*FSSCSAEDFEK.L                 | N381     |
|     | UMAN         |                                   |          |
| 175 | A0A7I2V2E1_H | R.N*FSSCSAEDFEKLTLNK.G            | N381     |
|     | UMAN         |                                   |          |
| 176 | A0A7I2V2E1_H | R.GLLHLEN*ASYGIEPLQ^N*SSHFEHIIY   | N144N154 |
|     | UMAN         | R.M                               |          |
| 177 | A0A7I2V2E1_H | R.GLLHLENASYGIEPLQ^N*SSHFEHIIY    | N154     |
|     | UMAN         | R.M                               |          |
| 178 | A0A7I2V2H5_H | R.LRN*SSLGDAINKYDVVIR.C           | N131     |
|     | UMAN         |                                   |          |
| 179 | A0A7I2V2K0_H | R.FVHVN*TSAVLK.L                  | N297     |
|     | UMAN         |                                   |          |
| 180 | A0A7I2V2T9_H | K.GTN*YTVR.L                      | N677     |
|     | UMAN         |                                   |          |

|     |                      |                                           |       |
|-----|----------------------|-------------------------------------------|-------|
| 181 | A0A7I2V2T9_H<br>UMAN | K.LSDTTSQSN*STAK.E                        | N1279 |
| 182 | A0A7I2V2T9_H<br>UMAN | K.LSDTTSQSN*STAKELDSLQTEAESLD<br>NTVK.E   | N1279 |
| 183 | A0A7I2V2U7_H<br>UMAN | K.EALN*SCNKR.E                            | N541  |
| 184 | A0A7I2V2U7_H<br>UMAN | K.TLVLSN*LSYSATEETLQEVFEK.A               | N492  |
| 185 | A0A7I2V2U7_H<br>UMAN | K.N*STWSGESK.T                            | N478  |
| 186 | A0A7I2V348_H<br>UMAN | K.KNKN*VTNR.S                             | N94   |
| 187 | A0A7I2V348_H<br>UMAN | R.KEN*SSEICSNN^GECVCGQCVCR.K              | N520  |
| 188 | A0A7I2V348_H<br>UMAN | K.SCGECIQAGPNCGWCTN*STFLQEGM<br>#PTSAR.C  | N50   |
| 189 | A0A7I2V348_H<br>UMAN | K.SCGECIQAGPNCGWCTN*STFLQ^EG<br>M#PTSAR.C | N50   |
| 190 | A0A7I2V348_H<br>UMAN | K.SYCKN^GVN*GTGEN^GRK.C                   | N406  |
| 191 | A0A7I2V3E2_H<br>UMAN | R.N*SSYVHGGVDASGKPQ^EAVYGQND<br>IHHK.V    | N37   |
| 192 | A0A7I2V466_H<br>UMAN | R.DVN*CSVMGPQEK.K                         | N53   |
| 193 | A0A7I2V466_H<br>UMAN | R.DVN*CSVM#GPQEK.K                        | N53   |
| 194 | A0A7I2V484_H<br>UMAN | K.YSVAN*DTGFVDIPKQEK.A                    | N97   |
| 195 | A0A7I2V5K0_H<br>UMAN | K.QN*ATKAR.I                              | N121  |
| 196 | A0A7P0SNB0_<br>HUMAN | R.RRDPGAAPGAAN*ASAQQPR.T                  | N81   |
| 197 | A0A7P0T828_H<br>UMAN | R.TGFYGEN*CSTPEFLTR.I                     | N53   |
| 198 | A0A7P0T8I6_H<br>UMAN | R.N*YTLWR.V                               | N215  |
| 199 | A0A7P0T9B0_H<br>UMAN | K.DFN*ETQLAR.I                            | N132  |
| 200 | A0A7P0TA85_<br>HUMAN | K.ALMN*GSESR.F                            | N149  |
| 201 | A0A7P0TA85_<br>HUMAN | K.ITDSEDKALMN*GSESR.F                     | N149  |

|     |                      |                                                           |         |
|-----|----------------------|-----------------------------------------------------------|---------|
|     | HUMAN                |                                                           |         |
| 202 | A0A7P0TA85_<br>HUMAN | K.ITDSEDKALM#N*GSESR.F                                    | N149    |
| 203 | A0A7P0TA85_<br>HUMAN | K.ILLTCSLN*DSATEVTGHR.W                                   | N41     |
| 204 | A0A7P0TA85_<br>HUMAN | K.ALM#N*GSESR.F                                           | N149    |
| 205 | A0A7P0TAF4_<br>HUMAN | K.SKGNPYSDLGN*HTTCR.Y                                     | N802    |
| 206 | A0A7P0TAN7_<br>HUMAN | K.SLVTQYLN*ATGNR.W                                        | N417    |
| 207 | A0A7P0TAN7_<br>HUMAN | K.SLVTQYLN*ATGN^R.W                                       | N417    |
| 208 | A0A7P0TAN7_<br>HUMAN | K.SLVTQ^YLN*ATGNR.W                                       | N417    |
| 209 | A0A7P0TAN7_<br>HUMAN | K.DASSFLAEWQN*ITK.G                                       | N358    |
| 210 | A0A7P0TAN7_<br>HUMAN | R.DIENLKDASSFLAEWQN*ITK.G                                 | N358    |
| 211 | A0A7P0TAN7_<br>HUMAN | R.DIEN^LKDASSFLAEWQN*ITK.G                                | N358    |
| 212 | A0A7P0TAN7_<br>HUMAN | R.LLIAGTN*SSDLQQILSLESNK.D                                | N374    |
| 213 | A0A7P0TAN7_<br>HUMAN | K.DASSFLAEWQN*ITKGFSEDR.L                                 | N358    |
| 214 | A0A7P0TAN7_<br>HUMAN | K.GFSEDRLLIAGTN*SSDLQQ^ILSLES<br>NKDLLLTSSYLSDSGSTGEHTK.S | N374    |
| 215 | A0A7P0Z481_H<br>UMAN | R.WIADPSPQN*STADTSK.V                                     | N281    |
| 216 | A0A804HHX0_<br>HUMAN | R.TDCDSSTTSLCSFPVAN*VSLTK.G                               | N152    |
| 217 | A0A804HHZ2_<br>HUMAN | K.TPPSPGQAVECCQGDWCNRN*ITAQL<br>PTK.G                     | N102    |
| 218 | A0A804HI12_H<br>UMAN | K.VVDDVSN*QTSCR.L                                         | N292    |
| 219 | A0A804HI12_H<br>UMAN | R.VLN*ASTLALALANLN*GSR.Q                                  | N92N104 |
| 220 | A0A804HIC8_H<br>UMAN | K.SAEGTFFIN*KTEIEDFPR.F                                   | N157    |
| 221 | A0A804HIC8_H<br>UMAN | K.SAEGTFFIN*KTEIEDFPRFPHR.G                               | N157    |

|     |                      |                                                        |          |
|-----|----------------------|--------------------------------------------------------|----------|
| 222 | A0A804HJR0_H<br>UMAN | R.VGVPEPGQLHFN*Q^CLTAEEIFSLHGF<br>SNATQ^ITSSK.F        | N72      |
| 223 | A0A804HJR0_H<br>UMAN | R.VGVPEPGQLHFN*Q^CLTAEEIFSLHGF<br>SN*ATQITSSK.F        | N72N88   |
| 224 | A0A804HJR0_H<br>UMAN | R.VGVPEPGQLHFNQCLTAEEIFSLHGFS<br>N*ATQ^ITSSK.F         | N88      |
| 225 | A0A804HK76_<br>HUMAN | R.APSVATVGSICDLNLKIPEIN*SSDMSA<br>HVTSPSGR.V           | N2085    |
| 226 | A0A804HKF9_<br>HUMAN | R.GTASADVSTDTRKAGGQEQ^N*GTQ^<br>Q^SIVVDM#R.E           | N724     |
| 227 | AAAT_HUMA<br>N       | R.SYSTTYEERN*ITGTR.V                                   | N212     |
| 228 | ADA10_HUMA<br>N      | R.N*ISQVLEK.K                                          | N439     |
| 229 | ADA10_HUMA<br>N      | R.EGICNGFTALCPASDPKPN*FTDCN^R.<br>H                    | N551     |
| 230 | ADA10_HUMA<br>N      | R.EGICN^GFTALCPASDPKPN*FTDCNR.<br>H                    | N551     |
| 231 | ADA15_HUMA<br>N      | R.DFQHLLN*R.T                                          | N237     |
| 232 | AGRE2_HUMA<br>N      | R.WCPQDSSCVN*ATACR.C                                   | N41      |
| 233 | AGRE5_HUMA<br>N      | R.GDKN*VTMGQSSAR.M                                     | N371     |
| 234 | AGRE5_HUMA<br>N      | R.GDKN*VTM#GQSSAR.M                                    | N371     |
| 235 | AGRE5_HUMA<br>N      | R.LSAVNSIFLSHN*NTK.E                                   | N453     |
| 236 | AGRE5_HUMA<br>N      | R.RLSAVNSIFLSHN*NTK.E                                  | N453     |
| 237 | AGRE5_HUMA<br>N      | R.RLSAVN^SIFLSHN*NTK.E                                 | N453     |
| 238 | AGRE5_HUMA<br>N      | R.WCPQNSSCVN*ATACR.C                                   | N38      |
| 239 | AGRE5_HUMA<br>N      | R.WCPQN*SSCVN*ATACR.C                                  | N33N38   |
| 240 | AGRE5_HUMA<br>N      | R.M#KLNWAVAAGAEDPGPAVAGILSIQ<br>^N*M#TTLLAN*ASLNLHSK.K | N406N413 |
| 241 | AGRE5_HUMA<br>N      | R.LSAVNSIFLSHN*N^TK.E                                  | N453     |
| 242 | AGRF5_HUMA           | K.MDYNSFQAVTIN*ESN^FFVTPEIIFEG                         | N272     |

|     |             |                                |          |
|-----|-------------|--------------------------------|----------|
|     | N           | DTVSLVCEKEVLSSNVSWR.Y          |          |
| 243 | AGR66_HUMAN | K.EANEVANQILNLTADGQN*LTSAN*IT  |          |
|     | N           | N^IVEQVKR.I                    | N600N605 |
| 244 | ALDOA_HUMAN | R.TVPPAVTGITFLSGGQSEEEASINLNAI |          |
|     | N           | N*K.C                          | N288     |
| 245 | AMPN_HUMAN  | K.AEFN*ITLIHPK.D               |          |
|     | N           |                                | N234     |
| 246 | AMPN_HUMAN  | K.KLN*YTLSQGHR.V               |          |
|     | N           |                                | N128     |
| 247 | AMPN_HUMAN  | K.GPSTPLPEDPNWN*VTEFHHTPK.M    |          |
|     | N           |                                | N265     |
| 248 | AMRP_HUMAN  | R.VIDLWDLAQSAN*LTDKELEAFREEL   |          |
|     | N           | K.H                            | N268     |
| 249 | APMAP_HUMAN | R.AGPN*GTLFVADAYK.G            |          |
|     | N           |                                | N160     |
| 250 | APMAP_HUMAN | K.N*M#SFVNDLTVTQDGR.K          |          |
|     | N           |                                | N196     |
| 251 | ASPH_HUMAN  | R.LVQLFPN*DTSLK.N              |          |
|     | N           |                                | N452     |
| 252 | ASPH_HUMAN  | K.SSGN*SSSSGSGSGSTSAGSSSPGAR.R |          |
|     | N           | R.LVQLFPN*DTSLKNDLGVGYLLIGDN   | N12      |
| 253 | ASPH_HUMAN  | DNAK.K                         |          |
|     | N           |                                | N452     |
| 254 | AT1A1_HUMAN | R.IISAN*GCKVDNSSLTGESEPQTR.S   |          |
|     | N           |                                | N209     |
| 255 | AT1A1_HUMAN | R.IISANGCKVDN*SSLTGESEPQTR.S   |          |
|     | N           |                                | N215     |
| 256 | AT1B1_HUMAN | K.YLQPLLAVQFTN*LTMDTEIR.I      |          |
|     | N           |                                | N265     |
| 257 | AT1B1_HUMAN | K.YLQPLLAVQFTN*LTM#DTEIR.I     |          |
|     | N           |                                | N265     |
| 258 | AT1B1_HUMAN | K.YLQ^PLLAVQFTN*LTM#DTEIR.I    |          |
|     | N           |                                | N265     |
| 259 | AT1B1_HUMAN | R.FKLEWLGN*CSGLNDETYGYK.E      |          |
|     | N           |                                | N158     |
| 260 | AT1B1_HUMAN | R.VLGFKPKPPKN*ESLETYPVMK.Y     |          |
|     | N           |                                | N193     |
| 261 | AT1B1_HUMAN | R.VLGFKPKPPKN*ESLETYPVM#K.Y    |          |
|     | N           |                                | N193     |
| 262 | AT1B1_HUMAN | R.FKLEWLGN*CSGLN^DETYGYK.E     |          |
|     | N           |                                | N158     |
| 263 | AT1B3_HUMAN | K.N*LTVC PDGALFEQK.G           |          |
|     | N           |                                | N124     |

|     |              |                                     |          |
|-----|--------------|-------------------------------------|----------|
| 264 | AT1B3_HUMAN  | K.FLKPYTLEEQKN*LTVCPDGALFEQK.G      | N124     |
| 265 | AT1B3_HUMAN  | K.LHVGYLQPLVAVQVSFAPN*NTGKEVTVECK.I | N240     |
| 266 | AT1B3_HUMAN  | K.LHVGYLQPLVAVQVSFAPN*NTGK.E        | N240     |
| 267 | ATG9A_HUMAN  | K.M#VN*HSLHPTEPVKVTLPDAFLPAQVCSAR.I | N99      |
| 268 | B0QY60_HUMAN | K.ALSPN*STISSAPK.D                  | N109     |
| 269 | B1AHC9_HUMAN | R.IM#LFTNEDNPHGN*DSAK.A             | N128     |
| 270 | B1AJY7_HUMAN | K.GAQVNAVQN*GCTPLHYAASK.N           | N72      |
| 271 | B1ALM5_HUMAN | R.N*ISGHIYNQN*VSQK.D                | N41N50   |
| 272 | B1AMW1_HUMAN | R.N*STSIYFK.M                       | N169     |
| 273 | B1AMW1_HUMAN | K.IQCTLSNPLFN*TTSSIILTTTCIPSSGHSR.H | N195     |
| 274 | B4DGG1_HUMAN | K.NTN*SSNN*FSR.S                    | N116N120 |
| 275 | B4DGG1_HUMAN | R.YKPDTLAVAVEN*GTGTDR.Q             | N389     |
| 276 | B8ZZL8_HUMAN | K.LN*N^SKK.K                        | N91      |
| 277 | BGAL_HUMAN   | R.NNVITLN*ITGK.A                    | N464     |
| 278 | BST2_HUMAN   | R.N*VTHLLQQELTEAQK.G                | N65      |
| 279 | BT2A1_HUMAN  | R.GSVALVIHN*ITAQEN*GTYR.C           | N114N120 |
| 280 | C9J9E8_HUMAN | R.SAN*ASFNIK.C                      | N116     |
| 281 | C9JSZ1_HUMAN | K.KVAPQN*DSFGTQLPPMHQQQR.S          | N103     |
| 282 | CA2D1_HUMAN  | K.DAVNN*ITAK.G                      | N324     |
| 283 | CA2D1_HUMAN  | K.VLKDAVNN*ITAK.G                   | N324     |
| 284 | CA2D1_HUMAN  | K.SFSGVLDCGN*CSR.I                  | N998     |
| 285 | CA2D1_HUMAN  | K.IDVNSWIEN*FTK.T                   | N824     |

|     |                 |                                                    |      |
|-----|-----------------|----------------------------------------------------|------|
|     | N               |                                                    |      |
| 286 | CA2D1_HUMA<br>N | K.GFSFAFEQLLNYN*VSR.A                              | N348 |
| 287 | CA2D1_HUMA<br>N | R.SLDNDNYVFTAPYFN*K.S                              | N781 |
| 288 | CA2D1_HUMA<br>N | K.KGFSFAFEQLLNYN*VSR.A                             | N348 |
| 289 | CAD13_HUMA<br>N | K.ANYNLPIM#VTDSGKPPM#TN*ITDLR.<br>V                | N671 |
| 290 | CAD13_HUMA<br>N | K.ISKIN*NTHALVSLQLNK.A                             | N638 |
| 291 | CAD13_HUMA<br>N | K.ANYNLPIMVTDSGKPPMTN*ITDLR.V                      | N671 |
| 292 | CAH12_HUMA<br>N | K.KYPSCGGLLQSPIDLHSDILQYDASLT<br>PLEFQ^GYN*LSANK.Q | N80  |
| 293 | CARF_HUMAN      | R.ASAQ^QEN*SSTCIGSAIK.S                            | N174 |
| 294 | CBPD_HUMAN      | R.GILN*ATISVAEINHPVTTYK.T                          | N811 |
| 295 | CBPD_HUMAN      | R.GLVMNYPHITN*LTNLGQSTEYR.H                        | N955 |
| 296 | CBPD_HUMAN      | R.GLVM#NYPHITN*LTNLGQSTEYR.H                       | N955 |
| 297 | CBPD_HUMAN      | K.DSITGSGLEN*ATISVAGIN^HNITTGR.<br>F               | N399 |
| 298 | CBPD_HUMAN      | R.RFANEYPN*ITR.L                                   | N522 |
| 299 | CBPD_HUMAN      | R.HIWSLEISNKPN*VSEPEEPK.I                          | N978 |
| 300 | CBPM_HUMA<br>N  | K.TVAQN*YSSVTHLHSIGK.S                             | N38  |
| 301 | CBPM_HUMA<br>N  | K.SQN*FSALKK.D                                     | N384 |
| 302 | CBPM_HUMA<br>N  | R.ELLHLIDYLVTSKGKDPEITNLIN*ST<br>R.I               | N115 |
| 303 | CC150_HUMA<br>N | M.DCKVHM#ETTVSRPVLSPTHIN*ATAS<br>ETFTVLQ^Q^RM#R.I  | N22  |
| 304 | CD109_HUMA<br>N | K.HLN*GTITAK.Y                                     | N247 |
| 305 | CD109_HUMA<br>N | R.N*VSTNVFFK.Q                                     | N337 |
| 306 | CD109_HUMA<br>N | R.TQDEILFSN*STR.L                                  | N118 |
| 307 | CD109_HUMA<br>N | R.N*YTEYWSGSNSGNQK.M                               | N397 |
| 308 | CD109_HUMA<br>N | R.FLVTAPGIIRPGGN*VTIGVELLEHCPS<br>QVTVK.A          | N41  |

|     |             |                                                        |       |
|-----|-------------|--------------------------------------------------------|-------|
| 309 | CD109_HUMAN | R.FLVTAPGIIRPGGN*VTIGVELLEHCPS<br>Q^VTVK.A             | N41   |
| 310 | CD276_HUMAN | R.DQGSAYAN*R.T                                         | N309  |
| 311 | CD276_HUMAN | R.VVLGAN*GTYSCLVR.N                                    | N215  |
| 312 | CD276_HUMAN | R.TALFPDLLAQGN*ASLR.L                                  | N104  |
| 313 | CD276_HUMAN | K.QLVHSFAEGQDQGSAYAN*R.T                               | N91   |
| 314 | CD276_HUMAN | R.GYPEAEVFWQDGQGVPLTGN*VTTSQ<br>MANEQ^GLFDVHSVLR.V     | N407  |
| 315 | CD276_HUMAN | R.GYPEAEVFWQDGQGVPLTGN*VTTSQ<br>M#ANEQ^GLFDVHSVLR.V    | N407  |
| 316 | CD276_HUMAN | R.GYPEAEVFWQDGQGVPLTGN*VTTSQ<br>^M#ANEQGLFDVHSVLR.V    | N407  |
| 317 | CDCP1_HUMAN | K.QN*ISVTLR.T                                          | N512  |
| 318 | CDCP1_HUMAN | R.ESN*ITVLIK.L                                         | N39   |
| 319 | CDCP1_HUMAN | R.IGTFCSN*GTVSR.I                                      | N180  |
| 320 | CDCP1_HUMAN | R.TCSSN*LTLTSGSK.H                                     | N386  |
| 321 | CDCP1_HUMAN | R.ASVSFLNFN*LSNCER.K                                   | N270  |
| 322 | CERS6_HUMAN | R.FWLPHN*VTWADLK.N                                     | N18   |
| 323 | CGT_HUMAN   | R.YPGIFN*STTSDAFLQSK.M                                 | N78   |
| 324 | CGT_HUMAN   | K.LSEIHKDQPGHPVN*R.T                                   | N442  |
| 325 | CHPF2_HUMAN | R.N*LTVLTPEGEAGLSWPVGLPAPFTPH<br>SR.F                  | N342  |
| 326 | CHST2_HUMAN | R.LDLRTPYRPPAAAVGAAPAAAAGM#<br>AGVAAPPGN*GTRGTGGVGDK.R | N152  |
| 327 | CLH1_HUMAN  | R.TSIDAYDNFDN*ISLAQ^RLEKHELIEF<br>R.R                  | N1492 |
| 328 | CLP1L_HUMAN | K.DLMVIN*R.S                                           | N229  |
| 329 | CLP1L_HUMAN | K.DLM#VIN*R.S                                          | N229  |
| 330 | CLP1L_HUMAN | R.TVN*VSVPKK.T                                         | N91   |



|     |             |                                                 |          |
|-----|-------------|-------------------------------------------------|----------|
|     | N           |                                                 |          |
| 331 | CLP1L_HUMAN | R.VKDLM#VIN*R.S                                 | N229     |
| 332 | CLP1L_HUMAN | R.TVN*VSVPK.K                                   | N91      |
| 333 | CLP1L_HUMAN | R.VKDLMVIN*R.S                                  | N229     |
| 334 | CLPT1_HUMAN | K.DYYPIN*ESLASLPLR.V                            | N295     |
| 335 | CLUS_HUMAN  | R.HN*STGCLR.M                                   | N291     |
| 336 | CLUS_HUMAN  | K.KKEDALN*ETR.E                                 | N86      |
| 337 | CLUS_HUMAN  | R.EIRHN*STGCLR.M                                | N291     |
| 338 | CLUS_HUMAN  | R.LAN*LTQGEDQYYLR.V                             | N374     |
| 339 | CLUS_HUMAN  | K.MLN*TSSLLEQLNEQFNWVSR.L                       | N354     |
| 340 | CLUS_HUMAN  | K.M#LN*TSSLLEQLNEQFNWVSR.L                      | N354     |
| 341 | CLUS_HUMAN  | K.LKELPGVCN*ETMMALWEECKPCLK.<br>Q               | N103     |
| 342 | CLUS_HUMAN  | K.LKELPGVCN*ETM#M#ALWEECKPCL<br>K.Q             | N103     |
| 343 | CLUS_HUMAN  | K.LKELPGVCN*ETMM#ALWEECKPCLK<br>.Q              | N103     |
| 344 | CNTP1_HUMAN | R.GHNSTFFGN^VN*ESAVVR.H                         | N128     |
| 345 | CNTP1_HUMAN | R.AN*ASEGTSPN*CTGHCAHPR.L                       | N948N956 |
| 346 | CNTP1_HUMAN | K.GLLTFVDHLPVTQVVIGDTN*R.S                      | N763     |
| 347 | CNTP1_HUMAN | R.TDKGLLTFVDHLPVTQVVIGDTN*R.S                   | N763     |
| 348 | CO5A1_HUMAN | K.N*VTLILDCK.K                                  | N176     |
| 349 | CO5A1_HUMAN | R.LLSASAHQN*VTYHCYQSVAWQDAA<br>TGSYDK.A         | N1741    |
| 350 | CO5A1_HUMAN | K.VYCN*FTAGGSTCVFPDKK.S                         | N1672    |
| 351 | COR1C_HUMAN | R.N*GSLICTASK.D                                 | N185     |
| 352 | CREL2_HUMAN | R.CHMGYQGPLCTDCMDGYFSSLRN*ET<br>HSICTACDESCK.T  | N190     |
| 353 | CREL2_HUMAN | R.CHMGYQGPLCTDCM#DGYFSSLRN*E<br>THSICTACDESCK.T | N190     |

|     |                  |                                                    |          |
|-----|------------------|----------------------------------------------------|----------|
| 354 | CRTAP_HUMA<br>N  | R.N*CSAAPQPEPAAGLASYPELR.L                         | N87      |
| 355 | CRTAP_HUMA<br>N  | R.DTWGLSDEHFQPRPEAVQFFN*VTTL<br>QK.E               | N363     |
| 356 | CRTAP_HUMA<br>N  | R.N*CSAAPQ^PEPAAGLASYPELR.L                        | N87      |
| 357 | CTL2_HUMAN       | K.TCNPETFPSSN*ESR.Q                                | N417     |
| 358 | D9J307_HUMA<br>N | R.GYYN*QSEAGSHTLQR.M                               | N110     |
| 359 | D9J307_HUMA<br>N | R.GYYN*Q^SEAGSHTLQ^R.M                             | N110     |
| 360 | DAF_HUMAN        | K.GSQWSDIEEFCN*R.S                                 | N95      |
| 361 | DCBD1_HUMA<br>N  | K.ELLLN*TSEVTVR.F                                  | N124     |
| 362 | DNER_HUMAN       | R.LVSFEVPQN*TSVK.I                                 | N223     |
| 363 | DNS2A_HUMA<br>N  | K.GHHVSQEPWN*SSITLTSQAGAVFQSF<br>AK.F              | N212     |
| 364 | DNS2A_HUMA<br>N  | K.TVGILPSNCSDIWQVLN^VNQIAFPGP<br>AGPSFN*STEDHSK.W  | N290     |
| 365 | DNS2A_HUMA<br>N  | K.TVGILPSNCSDIWQ^VLNVNQIAFPGP<br>AGPSFN*STEDHSK.W  | N290     |
| 366 | DNS2A_HUMA<br>N  | K.TVGILPSNCSDIWQVLNVN^Q^IAFPGP<br>AGPSFN*STEDHSK.W | N290     |
| 367 | DNS2A_HUMA<br>N  | K.TVGILPSNCSDIWQVLNVNQ^IAFPGP<br>AGPSFN*STEDHSK.W  | N290     |
| 368 | DNS2A_HUMA<br>N  | K.TVGILPSN*CSDIWQVLNVNQ^IAFPGP<br>AGPSFN*STEDHSK.W | N266N290 |
| 369 | DPP2_HUMAN       | R.ALAGLVYN*ASGSEHCYDIYR.L                          | N315     |
| 370 | DSG2_HUMAN       | K.IN*ATDADEPNTLNSK.I                               | N182     |
| 371 | E5RG56_HUM<br>AN | R.YN*LSEVLQGK.L                                    | N93      |
| 372 | E5RIP4_HUMA<br>N | R.GN*VTQHVQGHR.N                                   | N77      |
| 373 | E5RIP4_HUMA<br>N | R.N*LSTCFSSGDLFTAHN^FSEQ^SR.I                      | N87      |
| 374 | E5RIP4_HUMA<br>N | K.ALLNHLDVGVGRGN*VTQHVQGHR.<br>N                   | N77      |
| 375 | E5RIP4_HUMA<br>N | R.NLSTCFSSGDLFTAHN^FSEQ^SR.I                       | N102     |
| 376 | E9PJC7_HUMA<br>N | R.DYN*SSREDSLQDAWDYVQAQVK.C                        | N110     |

|     |                  |                                                                              |       |
|-----|------------------|------------------------------------------------------------------------------|-------|
| 377 | E9PJH8_HUMA<br>N | R.SLSN*STAR.N                                                                | N120  |
| 378 | E9PJL3_HUMA<br>N | K.DLCGPDAGPIGN*ATGQADCK.A                                                    | N56   |
| 379 | ECHA_HUMAN       | K.STKPIVAAIN*GSCLGGGLEVAISCQY<br>R.I                                         | N142  |
| 380 | EDEM3_HUMA<br>N  | K.LLPAFN*TTSGLPYPR.I                                                         | N195  |
| 381 | EF1A1_HUMA<br>N  | R.KDGN*ASGTTLEALDCILPPTRPTDK<br>PLR.L                                        | N222  |
| 382 | EF2_HUMAN        | R.SNTGGQAFPQCVDHWQILPGDPFDN<br>*SSRPSQVVAETR.K                               | N827  |
| 383 | EFNA5_HUMA<br>N  | R.YAVYWN*SSNPR.F                                                             | N37   |
| 384 | EGFR_HUMAN       | K.DSLSIN*ATNIK.H                                                             | N352  |
| 385 | EGFR_HUMAN       | K.N*CTSISGDLHILPVAFR.G                                                       | N361  |
| 386 | EGFR_HUMAN       | K.VCN^GIGIGEFKDSLSIN*ATNIK.H                                                 | N352  |
| 387 | EGFR_HUMAN       | R.KVCN^GIGIGEFKDSLSIN*ATNIK.H                                                | N352  |
| 388 | EGFR_HUMAN       | R.DIVSSDFLSN*MSM#DFQNHGSCQK.<br>C                                            | N175  |
| 389 | EGFR_HUMAN       | R.EFVENSECIQCHPECLPQAMN*ITCTG<br>R.G                                         | N568  |
| 390 | EGFR_HUMAN       | K.YADAGHVCHLCHPN*CTYGCTGPGLE<br>GCPTN^GPK.I                                  | N623  |
| 391 | EGFR_HUMAN       | K.RPAGSVQNPVYHNQPLNPAPSRDPHY<br>QDPHSTAVGNPEYLN^TVQ^PTCVN*ST<br>FDSPAHWAK.G  | N1148 |
| 392 | EGFR_HUMAN       | K.RPAGSVQ^NPVYHNQPLNPAPSRDPH<br>YQDPHSTAVGNPEYLN^TVQ^PTCVN*ST<br>FDSPAHWAK.G | N1148 |
| 393 | EGFR_HUMAN       | R.DIVSSDFLSN*MSMDFQNHGSCQK.C                                                 | N175  |
| 394 | EGFR_HUMAN       | R.DIVSSDFLSN*M#SM#DFQNHGSCQK<br>.C                                           | N175  |
| 395 | EGFR_HUMAN       | R.EFVENSECIQCHPECLPQAM#N*ITCTG<br>R.G                                        | N568  |
| 396 | EGFR_HUMAN       | K.RPAGSVQNPVYHNQPLNPAPSRDPHY<br>QDPHSTAVGNPEYLN^TVQ^PTCVN*STFD<br>SPAHWAK.G  | N1148 |
| 397 | EGFR_HUMAN       | K.RPAGSVQ^NPVYHNQPLNPAPSRDPH<br>YQDPHSTAVGNPEYLN^TVQ^PTCVN*STF<br>DSPAHWAK.G | N1148 |

|     |              |                                                 |          |
|-----|--------------|-------------------------------------------------|----------|
| 398 | ELAV1_HUMAN  | .MSNGYEDHM#AEDCRGDIGRTNLIVNY<br>LPQN*MTQDEL.R.S | N30      |
| 399 | EMB_HUMAN    | K.YVIN*GTYAN*ETK.L                              | N213N218 |
| 400 | EMC1_HUMAN   | R.FINYN*QTVSR.M                                 | N913     |
| 401 | EPHA2_HUMAN  | R.TASVSIN*QTEPPKVR.L                            | N435     |
| 402 | ERAP1_HUMAN  | K.CFDAM#EVDALN*SSHPVSTPVENPA<br>QIR.E           | N414     |
| 403 | ERBB2_HUMAN  | R.GHCWGPPTQCVN*CSQFLR.G                         | N530     |
| 404 | ERLN1_HUMAN  | R.N*YTADYDKTLIFNK.I                             | N108     |
| 405 | ERMP1_HUMAN  | R.DSGIWIN^GFDYTGISHITPHIPEIN*DSI<br>R.A         | N730     |
| 406 | ERO1A_HUMAN  | K.WGHN*ITEFQQR.F                                | N280     |
| 407 | F5GX30_HUMAN | R.LN*ETHIFN*GSNWIMLIYK.G                        | N107N113 |
| 408 | F5GXJ9_HUMAN | K.KLGDCISEDSYPDGN*ITWYR.N                       | N116     |
| 409 | F5GXJ9_HUMAN | K.IIISPEEN*VTLTCTAENQLER.T                      | N429     |
| 410 | F5GXJ9_HUMAN | K.NAIKEGDN*ITLK.C                               | N214     |
| 411 | F8VV56_HUMAN | K.NN*HTASILDR.M                                 | N37      |
| 412 | F8VV56_HUMAN | K.N^N*HTASILDR.M                                | N37      |
| 413 | F8VV56_HUMAN | K.CCGAAN*YTDWEKIPSMK.N                          | N57      |
| 414 | F8VV56_HUMAN | K.CCGAAN*YTDWEKIPSM#SK.N                        | N57      |
| 415 | F8VV56_HUMAN | K.NRVPDSCCIN*VTVGCGINFNEK.A                     | N79      |
| 416 | F8VV56_HUMAN | K.N^RVPDSCCIN*VTVGCGINFNEK.A                    | N79      |
| 417 | F8VV56_HUMAN | R.QQM#ENYPKNN*HTASILDR.M                        | N37      |
| 418 | F8VV56_HUMAN | R.QQM#ENYPKN^N*HTASILDR.M                       | N37      |

|     |              |                                                         |            |
|-----|--------------|---------------------------------------------------------|------------|
| 419 | F8VV56_HUMAN | R.QQMENYPKNN*HTASILDR.M                                 | N37        |
| 420 | F8VZX2_HUMAN | K.AFAMIIDKLEEDISSSM#TN*STAASRPVTLR.L                    | N89        |
| 421 | F8VZX2_HUMAN | K.AFAMIIDKLEEDISSSMTN*STAASRPPVTLR.L                    | N89        |
| 422 | F8WCC9_HUMAN | R.VPDAAN*LSSAWRN*HTVPLR.L                               | N57N64     |
| 423 | F8WCC9_HUMAN | R.VPDAAN*LSSAWR.N                                       | N57        |
| 424 | F8WEW3_HUMAN | K.YFN*YTVK.K                                            | N63        |
| 425 | FBN1_HUMAN   | R.VLPVN*VTDYQCQLVR.Y                                    | N448       |
| 426 | FBN2_HUMAN   | R.SYN*GTCENELPFN*VTKR.M                                 | N1745N1756 |
| 427 | FHL3_HUMAN   | R.KYIQTDSGPYCVPCYDNTFAN*TCAECQQLIGHDSR.E                | N38        |
| 428 | FKB10_HUMAN  | R.YHYN*GTFEDGK.K                                        | N70        |
| 429 | FKB10_HUMAN  | R.YHYN*GTFEDGKK.F                                       | N70        |
| 430 | FKB10_HUMAN  | R.TLSRPSETCN*ETTK.L                                     | N393       |
| 431 | FKB10_HUMAN  | R.YHYN*GTLLDGTSFDTSYSK.G                                | N182       |
| 432 | FKB10_HUMAN  | R.YHYN*GSLMDGTLFDSSYSR.N                                | N294       |
| 433 | FKB10_HUMAN  | R.YHYN*GSLM#DGTLFDSSYSR.N                               | N294       |
| 434 | FKB10_HUMAN  | R.N*HTYNTYIGQGYIIPGMDQGLQGACM#GER.R                     | N310       |
| 435 | FKB10_HUMAN  | R.YHYN*CSLLDGTQLFTSHDYGAPQEATLGANK.V                    | N407       |
| 436 | FKB10_HUMAN  | R.YHYN*CSLLDGTQLFTSHDYGAPQEATLGANKVIEGLDTGLQGMCVGER.R   | N407       |
| 437 | FKB10_HUMAN  | R.YHYN*CSLLDGTQLFTSHDYGAPQEATLGANKVIEGLDTGLQ^GMCVGER.R  | N407       |
| 438 | FKB10_HUMAN  | R.YHYN*CSLLDGTQLFTSHDYGAPQ^EATLGAN^KVIEGLDTGLQGMCVGER.R | N407       |
| 439 | FKB10_HUMAN  | R.YHYN*CSLLDGTQ^LFTSHDYGAPQEATLGANKVIEGLDTGLQ^GMCVGER.R | N407       |
| 440 | FKB10_HUMAN  | R.YHYN*CSLLDGTQ^LFTSHDYGAPQE                            | N407       |

|     |             |                                                                     |       |
|-----|-------------|---------------------------------------------------------------------|-------|
|     | N           | ATLGAN^KVIEGLDTGLQ^GMCVGERR.<br>Q                                   |       |
| 441 | FKB10_HUMAN | R.N*HTYNTYIGQGYIIPGMDQGLQGAC<br>MGER.R                              | N310  |
| 442 | FKB10_HUMAN | R.YHYN*CSLLDGTQ^LFTSHDYGAPQE<br>ATLGANKVIEGLDTGLQGMCVGER.R          | N407  |
| 443 | FKB10_HUMAN | R.YHYN*CSLLDGTQLFTSHDYGAPQEA<br>TLGANKVIEGLDTGLQGM#CVGER.R          | N407  |
| 444 | FKB10_HUMAN | R.N*HTYNTYIGQGYIIPGM#DQGLQGAC<br>M#GER.R                            | N310  |
| 445 | FKB10_HUMAN | R.YHYN*CSLLDGTQ^LFTSHDYGAPQE<br>ATLGANK.V                           | N407  |
| 446 | FKBP9_HUMAN | R.YHYN*GTLDDGTFLDSSYSR.N                                            | N286  |
| 447 | FKBP9_HUMAN | R.YHYN*GTFLDGTFLDSSHR.M                                             | N174  |
| 448 | FLNA_HUMAN  | R.VGEPGHGGDPGLVSAYGAGLEGGVT<br>GNPAEFVVN*TSNAGAGALSVTIDGPSK.<br>V   | N2453 |
| 449 | FLNA_HUMAN  | R.VGEPGHGGDPGLVSAYGAGLEGGVT<br>GN^PAEFVVN*TSNAGAGALSVTIDGPS<br>K.V  | N2453 |
| 450 | FLNA_HUMAN  | R.VGEPGHGGDPGLVSAYGAGLEGGVT<br>GNPAEFVVN*TSN^AGAGALSVTIDGPS<br>K.V  | N2453 |
| 451 | FLNA_HUMAN  | R.VGEPGHGGDPGLVSAYGAGLEGGVT<br>GN^PAEFVVN*TSN^AGAGALSVTIDGPS<br>K.V | N2453 |
| 452 | FLNA_HUMAN  | R.VGEPGHGGDPGLVSAYGAGLEGGVT<br>GNPAEFVVN*TSNAGAGALSVTIDGPSK<br>VK.M | N2453 |
| 453 | FOLR1_HUMAN | K.VSN*YSR.G                                                         | N201  |
| 454 | FOLR1_HUMAN | K.GWN*WTSGFNK.C                                                     | N161  |
| 455 | FOLR1_HUMAN | R.KNACCSTN*TSQEAHK.D                                                | N69   |
| 456 | FOLR1_HUMAN | K.SNWHKGWN*WTSGFNK.C                                                | N161  |
| 457 | FOLR1_HUMAN | K.NACCSTN*TSQEAHKDVSYL.YR.F                                         | N69   |

|     |                  |                                                                                   |          |
|-----|------------------|-----------------------------------------------------------------------------------|----------|
| 458 | FOLR1_HUMA<br>N  | K.N*ACCSTN*TSQEAHKDVSYL <sup>R</sup> .F                                           | N63N69   |
| 459 | FOLR1_HUMA<br>N  | R.KNACCSTN*TSQEAHKDVSYL <sup>R</sup> .F                                           | N69      |
| 460 | FOLR1_HUMA<br>N  | R.KN*ACCSTN*TSQEAHKDVSYL <sup>R</sup> .F                                          | N63N69   |
| 461 | FOLR1_HUMA<br>N  | R.KNACCSTN*TSQ <sup>^</sup> EAHKDVSYL <sup>R</sup> .F                             | N69      |
| 462 | FOLR1_HUMA<br>N  | K.N*ACCSTN <sup>T</sup> TSQ <sup>^</sup> EAHKDVSYL <sup>R</sup> .F                | N63      |
| 463 | FOLR1_HUMA<br>N  | R.KN*ACCSTN <sup>T</sup> TSQ <sup>^</sup> EAHKDVSYL <sup>R</sup> .F               | N63      |
| 464 | FOLR1_HUMA<br>N  | K.NACCSTN*TSQ <sup>^</sup> EAHKDVSYL <sup>R</sup> .F                              | N69      |
| 465 | FOXJ3_HUMA<br>N  | R.SSLN*NSLSDQSLASVNLNSVGSVHSY<br>TPVTSHPEVSQSLTPQQQPQYN <sup>^</sup> LPERD<br>K.Q | N229     |
| 466 | FPRP_HUMAN       | R.AAVPKN*VSVAEGK.E                                                                | N286     |
| 467 | FPRP_HUMAN       | R.YSVLIM#AEKPVGDLSSPN*ETK.Y                                                       | N600     |
| 468 | FPRP_HUMAN       | R.EAATSLSNPIEIDFQTS <sup>G</sup> PIFN*ASVHSD<br>TPSVIR.G                          | N691     |
| 469 | FPRP_HUMAN       | R.EAATSLSN <sup>^</sup> PIEIDFQTS <sup>G</sup> PIFN*ASVHS<br>DTPSVIR.G            | N691     |
| 470 | FSTL1_HUMA<br>N  | K.GSN*YSEILD <sup>K</sup> YFK.N                                                   | N144     |
| 471 | FSTL1_HUMA<br>N  | K.FVEQN*ETAIN*IT <sup>T</sup> YPDQEN <sup>N</sup> K.L                             | N175N180 |
| 472 | FSTL1_HUMA<br>N  | K.FVEQNETAIN*IT <sup>T</sup> YPDQEN <sup>N</sup> <sup>^</sup> KLLR.G              | N180     |
| 473 | FSTL3_HUMA<br>N  | R.AECCASGNIDTAWSN*LTHPGNK.I                                                       | N73      |
| 474 | FSTL3_HUMA<br>N  | R.AAPCPVPSSPGQELCGNN <sup>N</sup> *VTYISSC<br>HMR.Q                               | N215     |
| 475 | FUBP2_HUMA<br>N  | R.GRGGPPGQFHDNAN <sup>^</sup> GGQN*GTVQEI<br>MIPAGK.A                             | N232     |
| 476 | G0XQ39_HUM<br>AN | R.LAVTN*TTM#TGTVLK.M                                                              | N171     |
| 477 | G3P_HUMAN        | K.IISN*ASCTTNCLAPLAK.V                                                            | N149     |
| 478 | G3XAL9_HUM<br>AN | R.DATGNVN*DTIVTEL <sup>T</sup> N*CTSAACK.L                                        | N553N562 |
| 479 | GALNS_HUMA       | K.TGEAN*LTQIYLQEALDFIKR.Q                                                         | N204     |

|     |             |                                            |          |
|-----|-------------|--------------------------------------------|----------|
|     | N           |                                            |          |
| 480 | GALT1_HUMAN |                                            |          |
|     | N           | R.N*VTLPEIF.-                              | N552     |
| 481 | GALT1_HUMAN |                                            |          |
|     | N           | K.INQFNLMASEMIALN*R.S                      | N95      |
| 482 | GDE1_HUMAN  | R.EAVAECLELNHN*LTIFFDVK.G                  | N168     |
| 483 | GILT_HUMAN  | K.SNAPLVN*VTLYYEALCGGCR.A                  | N63      |
| 484 | GNS_HUMAN   | R.GASN*LTWR.S                              | N405     |
| 485 | GNS_HUMAN   | R.GPGIKPN*QTSK.M                           | N362     |
| 486 | GNS_HUMAN   | K.YYN*YTLSIN^GK.A                          | N183     |
| 487 | GNS_HUMAN   | K.TPMTN*SSIQFLDNAFR.K                      | N279     |
| 488 | GNS_HUMAN   | K.YPHNHHVVN*NTLEGN*CSSK.S                  | N111N117 |
| 489 | GNS_HUMAN   | R.ASILTGKYPHNHHVVN*N^TLEGNCSS<br>K.S       | N111     |
| 490 | GNS_HUMAN   | R.ASILTGKYPHNHHVVN*NTLEGN*CSS<br>K.S       | N111N117 |
| 491 | GNS_HUMAN   | R.ASILTGKYPHN^HHVVN*N^TLEGNCSS<br>SK.S     | N111     |
| 492 | GNS_HUMAN   | R.ASILTGKYPHNHHVVN*N^TLEGN*CSS<br>SK.S     | N111N117 |
| 493 | GNS_HUMAN   | R.ASILTGKYPHN^HHVVNN^TLEGN*CSS<br>SK.S     | N117     |
| 494 | GNS_HUMAN   | K.TPM#TN*SSIQFLDNAFR.K                     | N279     |
| 495 | GNS_HUMAN   | R.ASILTGKYPHN^HHVVNN^TLEGN*CSS<br>K.S      | N117     |
| 496 | GOLI4_HUMAN | R.KPDPAEQQN*VTQVAHSPQGYNTAR.<br>E          | N257     |
| 497 | GOLM1_HUMAN |                                            |          |
|     | N           | K.AVLVNN*ITTGER.L                          | N109     |
| 498 | GOLM1_HUMAN |                                            |          |
|     | N           | R.LQQDVLQFQKN*QTNLER.K                     | N144     |
| 499 | GPC1_HUMAN  | R.SFDDHFQHLLN*DSER.T                       | N116     |
| 500 | GPC1_HUMAN  | R.ICPQGYTCCTSEM#EENLAN*R.S                 | N79      |
| 501 | GRN_HUMAN   | K.YGCCPM#PN*ATCCSDHLHCCPQ^DT<br>VCDLIQSK.C | N236     |
| 502 | GRN_HUMAN   | K.YGCCPMPN*ATCCSDHLHCCPQDTVC<br>DLIQSK.C   | N236     |
| 503 | GSLG1_HUMAN |                                            |          |
|     | N           | R.GN*ITEYQCHQYITK.M                        | N210     |
| 504 | GT251_HUMAN |                                            |          |
|     | N           | R.TALWVATDHNM#DN*TSTVLR.E                  | N96      |



|     |              |                                                             |          |
|-----|--------------|-------------------------------------------------------------|----------|
| 505 | GT251_HUMAN  | K.AM#N*TSQVEALGIQMLPGYRDPYHG<br>RPLTK.G                     | N381     |
| 506 | GT251_HUMAN  | R.TALWVATDHNMDN*TSTVLR.E                                    | N96      |
| 507 | GT251_HUMAN  | K.AMN*TSQVEALGIQMLPGYRDPYHGR<br>PLTK.G                      | N381     |
| 508 | GTR1_HUMAN   | K.VIEEFYN*QTWVHR.Y                                          | N45      |
| 509 | H0Y2P0_HUMAN | K.AFN*STLPTMAQMEK.A                                         | N17      |
| 510 | H0Y2P0_HUMAN | K.AFN*STLPTMAQM#EK.A                                        | N17      |
| 511 | H0Y2P0_HUMAN | K.AFN*STLPTM#AQMEK.A                                        | N17      |
| 512 | H0Y2P0_HUMAN | K.AFN*STLPTM#AQM#EK.A                                       | N17      |
| 513 | H0Y4T7_HUMAN | K.AGVVN*GTGAPGQSPGAGR.A                                     | N170     |
| 514 | H0Y6N5_HUMAN | R.N*VTHHVSVTK.Q                                             | N410     |
| 515 | H0Y786_HUMAN | K.NALENYPNFRSVVDPPEIVLAKIN^SV<br>N*Q^SDVK.Y                 | N849     |
| 516 | H0Y997_HUMAN | R.N*ITGLEN*FTLK.I                                           | N165N171 |
| 517 | H0Y997_HUMAN | K.IFIFN*QTGIEAK.K                                           | N277     |
| 518 | H0Y997_HUMAN | K.VNCEERN*ITGLEN*FTLK.I                                     | N165N171 |
| 519 | H0Y9E3_HUMAN | K.ILFYNVVVEN^LDKPSSSELHSIPAPAN<br>*STK.L                    | N98      |
| 520 | H0YCL3_HUMAN | .SPAASN*SSDLFDLM#GSSQATM#TSSQ<br>SM#N*FSM#MSTN^TVGLGLPMSR.S | N6N28    |
| 521 | H0YFA9_HUMAN | R.GPGIKPN*QTSK.R                                            | N182     |
| 522 | H0YFA9_HUMAN | -.YYN*YTLSIN^GK.A                                           | N3       |
| 523 | H0YKH6_HUMAN | R.LWLPVN*LTWADLEDR.D                                        | N19      |
| 524 | H0YKJ9_HUMAN | K.TYN*GTNPDAASR.A                                           | N38      |
| 525 | H0YKJ9_HUMAN | R.ETASNCN*GSLAHPSDLYAEGCEALV                                | N94      |

|     |                  |                                                                            |          |
|-----|------------------|----------------------------------------------------------------------------|----------|
|     | AN               | VK.K                                                                       |          |
| 526 | H0YKJ9_HUM<br>AN | R.QLHCCGIHN*YSDWENTDWFK.E                                                  | N63      |
| 527 | H0YNA7_HUM<br>AN | R.DMN*QTLGDN*ITVK.M                                                        | N107N113 |
| 528 | H0YNA7_HUM<br>AN | R.DM#N*QTLGDN*ITVK.M                                                       | N107N113 |
| 529 | H0YNA7_HUM<br>AN | K.GGAEAMLVVN*NSVLFPPSGN*RSEFP<br>DVK.I                                     | N74N84   |
| 530 | H0YNF6_HUM<br>AN | K.NFIIN*MTCR.F                                                             | N66      |
| 531 | H0YNK6_HUM<br>AN | R.TATVHLQALPAAPFN*ITVTK.L                                                  | N185     |
| 532 | H12_HUMAN        | K.ALAAAGYDVEKN*N^SR.I                                                      | N76      |
| 533 | H3BUA1_HUM<br>AN | R.YNISVIN*GTSPFAYDYDLTHIVAAYQ<br>^ER.N                                     | N31      |
| 534 | H7BYB7_HUM<br>AN | R.LLN*CTAPGPDAAAR.C                                                        | N86      |
| 535 | H7BZ97_HUM<br>AN | R.LWN*STFLEEYSK.L                                                          | N125     |
| 536 | H7BZ97_HUM<br>AN | R.SRLWN*STFLEEYSK.L                                                        | N125     |
| 537 | H7BZ97_HUM<br>AN | K.YQTLN*CSVNVNCVNIR.C                                                      | N94      |
| 538 | H7BZ97_HUM<br>AN | R.KYQTLN*CSVNVNCVNIR.C                                                     | N94      |
| 539 | H7C399_HUMA<br>N | -.GLTLQ^HHM#GSADLN*ATFYGPVK.K                                              | N14      |
| 540 | H7C543_HUMA<br>N | -.KLGDCISEDSYPDGN*ITWYR.N                                                  | N15      |
| 541 | HEMO_HUMA<br>N   | R.SWPAVGN*CSSALR.W                                                         | N187     |
| 542 | HEXB_HUMAN       | K.M#TPNLLHLAPENFYISHSPN*STAGPS<br>CTLLEEAFR.R                              | N84      |
| 543 | HS2ST_HUMA<br>N  | K.YHVLHIN*TTK.N                                                            | N108     |
| 544 | HSP13_HUMA<br>N  | R.N*STIEAANLAGLK.I                                                         | N184     |
| 545 | HXA13_HUMA<br>N  | K.NM#EGAAAAAAAAAAAAAAAAAGAGGG<br>GFPHPAAAAAGGNFSVAAAAAAAAAAAA<br>AAN*QCR.N | N85      |

|     |             |                                                                        |       |
|-----|-------------|------------------------------------------------------------------------|-------|
| 546 | ICAM1_HUMAN | R.AN*LTVVLLR.G                                                         | N145  |
| 547 | ICAM1_HUMAN | R.LNPTVTYGN*DSFSAK.A                                                   | N267  |
| 548 | ICAM1_HUMAN | R.SFSCSATLEVAGQLIHKN*QTR.E                                             | N385  |
| 549 | IGS10_HUMAN | R.N*STVNIPLFR.R                                                        | N999  |
| 550 | IGS10_HUMAN | R.VQVLPN*GTL SIQR.V                                                    | N1705 |
| 551 | IGS10_HUMAN | R.TLN*LTDVIEELAQASTQTLK.S                                              | N1416 |
| 552 | IGSF3_HUMAN | R.VQGN*STLLHITDLQAR.D                                                  | N101  |
| 553 | IKIP_HUMAN  | R.ITEKQDILN*NSLT TLSQDITK.V                                            | N144  |
| 554 | IMB1_HUMAN  | K.NYVLQTLGTETYRPSSASQCVAGIAC<br>AEIPVNQWPELIPQLVANVTNPN*STEH<br>MK.E   | N141  |
| 555 | IMB1_HUMAN  | K.NYVLQTLGTETYRPSSASQCVAGIAC<br>AEIPVNQWPELIPQLVANVTNPN*STEH<br>M#K.E  | N141  |
| 556 | IMB1_HUMAN  | K.NYVLQTLGTETYRPSSASQCVAGIAC<br>AEIPVNQWPELIPQLVAN*VTN^PNSTEH<br>M#K.E | N136  |
| 557 | IMPA3_HUMAN | K.QVALQTFGN*QTTIIPAGGAGYK.V                                            | N259  |
| 558 | IPO5_HUMAN  | R.N*TTAAEEAR.Q                                                         | N51   |
| 559 | ITA1_HUMAN  | R.N*TFNVESTK.K                                                         | N418  |
| 560 | ITA1_HUMAN  | K.SYFSSLN*LTIR.G                                                       | N1102 |
| 561 | ITA1_HUMAN  | R.YN*HTGQVIIYR.M                                                       | N460  |
| 562 | ITA1_HUMAN  | K.QTQVGIVQYGEN*VTHEFNLNK.Y                                             | N217  |
| 563 | ITA1_HUMAN  | R.TIVHYSPNLVFSGIEAIQKDSCE SNHN*<br>ITCK.V                              | N883  |
| 564 | ITA2_HUMAN  | K.TN*MSLGLILTR.N                                                       | N112  |
| 565 | ITA2_HUMAN  | R.TASCSN*VTCWLK.D                                                      | N1057 |
| 566 | ITA2_HUMAN  | K.LNLQSTSTSIPN*VTEM#K.T                                                | N105  |
| 567 | ITA2_HUMAN  | K.TN*M#SLGLILTR.N                                                      | N112  |
| 568 | ITA3_HUMAN  | R.MN*ITVK.N                                                            | N107  |
| 569 | ITA3_HUMAN  | K.N*ITIVTGAPR.H                                                        | N265  |
| 570 | ITA3_HUMAN  | K.LLLSIN*VTNTR.T                                                       | N656  |
| 571 | ITA3_HUMAN  | R.KLLLSIN*VTNTR.T                                                      | N656  |
| 572 | ITA3_HUMAN  | R.VWN*STFIEDYR.D                                                       | N935  |
| 573 | ITA3_HUMAN  | R.VWN*STFIEDYRDFDR.V                                                   | N935  |
| 574 | ITA3_HUMAN  | R.VWN*STFIEDYRDFDRVR.V                                                 | N935  |
| 575 | ITA3_HUMAN  | R.AHCWLECPIDAPVVTN*VTVK.A                                              | N926  |

|     |              |                                                       |          |
|-----|--------------|-------------------------------------------------------|----------|
| 576 | ITA3_HUMAN   | R.SLDAYPILNQAQALEN*HTEVQFQK.E                         | N605     |
| 577 | ITA5_HUMAN   | K.NLN*NSQSDVVSFR.L                                    | N773     |
| 578 | ITA5_HUMAN   | R.VTGLN*CTTNHPINPK.G                                  | N868     |
| 579 | ITA5_HUMAN   | K.GN*LTYGYVTILN*GSDIR.S                               | N297N307 |
| 580 | ITA5_HUMAN   | R.HPGN*FSSLSCDYFAVN*QSR.L                             | N712N724 |
| 581 | ITA5_HUMAN   | R.HPGN*FSSLSCDYFAVNQ^SR.L                             | N712     |
| 582 | ITA5_HUMAN   | K.NALN*LTFAQNVGEGGAYEAELR.V                           | N675     |
| 583 | ITA5_HUMAN   | R.TEKEPLSDPVGTCYLSTDN*FTR.I                           | N182     |
| 584 | ITA5_HUMAN   | K.LSPIHIALN*FSLDPQAPVDSHGLRPAL<br>HYQ^SK.S            | N609     |
| 585 | ITA5_HUMAN   | R.DKLSPIHIALN*FSLDPQAPVDSHGLRP<br>ALHYQSK.S           | N609     |
| 586 | ITAV_HUMAN   | R.SPSHKN*MTISR.G                                      | N554     |
| 587 | ITAV_HUMAN   | R.LSCAFKTEN*QTR.Q                                     | N704     |
| 588 | ITAV_HUMAN   | K.AN*TTQPGIVEGGQVLK.C                                 | N74      |
| 589 | ITAV_HUMAN   | K.ISSLQTTEKN*DTVAGQGER.D                              | N874     |
| 590 | ITAV_HUMAN   | R.TAADTTGLQPILNQFTPAN*ISR.Q                           | N615     |
| 591 | ITAV_HUMAN   | R.ARPVITVNAGLEVYPSILNQDN*K.T                          | N488     |
| 592 | ITAV_HUMAN   | R.ARPVITVNAGLEVYPSILNQDN*KTCS<br>LPGTALK.V            | N488     |
| 593 | ITAV_HUMAN   | R.ARPVITVN^AGLEVYPSILNQDN*KTC<br>SLPGTALK.V           | N488     |
| 594 | ITB1_HUMAN   | K.N^GVN*GTGEN^GRK.C                                   | N406     |
| 595 | ITB1_HUMAN   | K.CHEGN*GTFECGACR.C                                   | N481     |
| 596 | ITB1_HUMAN   | K.DTCTQECSYFN*ITK.V                                   | N669     |
| 597 | ITB1_HUMAN   | K.KDTCTQECSYFN*ITK.V                                  | N669     |
| 598 | ITB1_HUMAN   | R.NPCTSEQN*CTSPFSYK.N                                 | N212     |
| 599 | ITB1_HUMAN   | K.LRNPCTSEQN*CTSPFSYK.N                               | N212     |
| 600 | ITB1_HUMAN   | K.DTCTQECSYFN*ITKVESR.D                               | N669     |
| 601 | ITB1_HUMAN   | K.KDTCTQECSYFN*ITKVESR.D                              | N669     |
| 602 | ITB1_HUMAN   | R.KEN*SSEICSNNGECVCGQCVC.R.K                          | N520     |
| 603 | ITB5_HUMAN   | K.SN*LTVLR.E                                          | N705     |
| 604 | ITB5_HUMAN   | K.FN*KSYNGTVD.-                                       | N791     |
| 605 | ITPR2_HUMAN  | K.SSNYENGEIGESQVKGGEPIEESNILS<br>PVQ^DGTKKPQ^IDSN*K.S | N1174    |
| 606 | J3KN66_HUMAN | K.HLN*SSHPR.S                                         | N415     |
| 607 | J3KRX0_HUMAN | R.DLQAPLQSFSCSN*SSIILSPAVHLDL<br>LSLR.L               | N81      |
| 608 | J3KS10_HUMAN | K.AN*GTTVHVGIHPSK.L                                   | N35      |

|     |              |                                                        |      |
|-----|--------------|--------------------------------------------------------|------|
| 609 | K4DIA7_HUMAN | R.YHQPGHEAVTSAVDQLQQEFHCCGS<br>N*NSQDWR.D              | N159 |
| 610 | K4DIA7_HUMAN | K.RYHQPGHEAVTSAVDQLQQEFHCCG<br>SN*NSQDWR.D             | N159 |
| 611 | K4DIA7_HUMAN | K.RYHQPGHEAVTSAVDQLQQEFHCCG<br>SN*N^SQDWR.D            | N159 |
| 612 | K4DIA7_HUMAN | R.YHQPGHEAVTSAVDQLQQ^EFHCCGS<br>N*NSQDWR.D             | N159 |
| 613 | K4DIA7_HUMAN | R.YHQPGHEAVTSAVDQLQQEFHCCGS<br>N*N^SQDWR.D             | N159 |
| 614 | KIF1C_HUMAN  | K.LQ^N*SSKDR.E                                         | N851 |
| 615 | KIRR1_HUMAN  | K.VGSTN*VSTLVNVHFAPR.I                                 | N297 |
| 616 | KIRR1_HUMAN  | R.IDGGPVILLQAGTPHN*LTCR.A                              | N140 |
| 617 | L1CAM_HUMAN  | R.GYN*VTYWR.E                                          | N849 |
| 618 | L1CAM_HUMAN  | K.VPGN*QTSTTLK.L                                       | N671 |
| 619 | L1CAM_HUMAN  | R.FFPYAN*GTLGIR.D                                      | N479 |
| 620 | L1CAM_HUMAN  | R.THN*LTDLSPHLR.Y                                      | N979 |
| 621 | L1CAM_HUMAN  | K.WYSLGKVPGN*QTSTTLK.L                                 | N671 |
| 622 | L1CAM_HUMAN  | R.LVIHSLDYSQGN*YSCVASTELDVVE<br>SR.A                   | N588 |
| 623 | L1CAM_HUMAN  | R.LLFPTN*SSSHLVALQGQPLVLECIAE<br>GFPTPTIK.W            | N247 |
| 624 | L1CAM_HUMAN  | R.VTMGQN^GNLYFANVLTS DN*HSDYI<br>CHAHFPGTR.T           | N203 |
| 625 | L1CAM_HUMAN  | R.VTMGQNGNLYFAN^VLTS DN*HSDYI<br>CHAHFPGTR.T           | N203 |
| 626 | L1CAM_HUMAN  | R.GSGPASEFTFSTPEGVPGHPEALHLEC<br>QSN*TSLLLR.W          | N931 |
| 627 | L1CAM_HUMAN  | K.VQAVNSQKGPEPQVTIGYSGEDYPQ<br>^AIPELEGIEILN*SSAVLVK.W | N825 |
| 628 | L1CAM_HUMAN  | R.VTYQNHN*K.T                                          | N294 |
| 629 | L1CAM_HUMAN  | R.LVIHSLDYSQ^GN*YSCVASTELDVV                           | N588 |

|     |                 |                                                |            |
|-----|-----------------|------------------------------------------------|------------|
|     | N               | ESR.A                                          |            |
| 630 | L1CAM_HUMA<br>N | R.EGGTM#ALSGISDFGN*ISATAGEN*Y<br>SVVSWVPK.E    | N1022N1030 |
| 631 | L1CAM_HUMA<br>N | R.VTM#GQNGNLYFAN^VLTS DN*HSDY<br>ICHAHFPGTR.T  | N203       |
| 632 | L1CAM_HUMA<br>N | R.GSGPASEFTFSTPEGVPGHPEALHLEC<br>Q^SN*TSLLLR.W | N931       |
| 633 | L1CAM_HUMA<br>N | R.GPWQEQIVSDPFLVVS N*TSTFVPYEI<br>K.V          | N777       |
| 634 | L1CAM_HUMA<br>N | R.VTMGQN^GN^LYFANVLTS DN*HSDY<br>ICHAHFPGTR.T  | N203       |
| 635 | LAMA5_HUMA<br>N | R.AQQLLAN*STALEEAMLQEQR.L                      | N2568      |
| 636 | LAMA5_HUMA<br>N | R.TLSELMSTGHLGLAN*ASAPSGEQLL<br>R.T            | N2303      |
| 637 | LAMA5_HUMA<br>N | K.LVGGPVAGGDPN*QTIR.G                          | N95        |
| 638 | LAMA5_HUMA<br>N | R.TLSELM#SQTGHLGLAN*ASAPSGEQL<br>LR.T          | N2303      |
| 639 | LAMA5_HUMA<br>N | R.VFDLQQNLGSVN*VSTGCAPALQAQT<br>PGLGPR.G       | N3287      |
| 640 | LAMC1_HUMA<br>N | K.LLNN*LTSIK.I                                 | N650       |
| 641 | LAMC1_HUMA<br>N | R.VN*NTLSSQISR.L                               | N1107      |
| 642 | LAMC1_HUMA<br>N | R.IASAVQKN*ATSTK.A                             | N1439      |
| 643 | LAMC1_HUMA<br>N | R.VNDN*KTAAEEALR.K                             | N1380      |
| 644 | LAMC1_HUMA<br>N | R.KIPAIN*QTITEANEK.T                           | N1395      |
| 645 | LAMC1_HUMA<br>N | K.VAAAN*VSVTQPESTGDPNN*MTLLA<br>EEAR.K         | N1161N1175 |
| 646 | LAMC1_HUMA<br>N | K.VAAANVSVTQPESTGDPN^N*M#TLL<br>AEEARK.L       | N1175      |
| 647 | LAMC1_HUMA<br>N | K.VAAAN*VSVTQ^PESTGDPNN*M#TLL<br>AEEARK.L      | N1161N1175 |
| 648 | LAMC1_HUMA<br>N | K.AKVAAAN*VSVTQPESTGDPNN*M#T<br>LLAEEAR.K      | N1161N1175 |
| 649 | LAMC1_HUMA<br>N | R.RVNDN*KTAAEEALR.K                            | N1380      |

|     |             |                                              |              |
|-----|-------------|----------------------------------------------|--------------|
| 650 | LAMP1_HUMAN | R.LLNINPN*K.T                                | N261         |
| 651 | LAMP1_HUMAN | R.GHTLTLN*FTR.N                              | N103         |
| 652 | LAMP1_HUMAN | K.N*MTFDLPSDATVVVLN*R.S                      | N62N76       |
| 653 | LAMP1_HUMAN | K.N*M#TFDLPSDATVVVLN*R.S                     | N62N76       |
| 654 | LAMP1_HUMAN | R.SSCGKEN*TSDPSLVIAFGR.G                     | N84          |
| 655 | LAMP1_HUMAN | K.SGPKN*MTFDLPSDATVVVLNR.S                   | N62          |
| 656 | LAMP1_HUMAN | K.SGPKN*MTFDLPSDATVVVLN*R.S                  | N62N76       |
| 657 | LAMP1_HUMAN | K.SGPKN*M#TFDLPSDATVVVLNR.S                  | N62          |
| 658 | LAMP1_HUMAN | K.SGPKN*M#TFDLPSDATVVVLN*R.S                 | N62N76       |
| 659 | LAMP1_HUMAN | R.YSVQLMSFVYN*LSDTHLFPN*ASSK.<br>E           | N121N130     |
| 660 | LAMP1_HUMAN | R.YSVQLM#SFVYN*LSDTHLFPN*ASSK.<br>E          | N121N130     |
| 661 | LAMP1_HUMAN | K.SPSVDKYNVSGTNGTCLLASMGLQ^LN*<br>LTYER.K    | N241         |
| 662 | LAMP1_HUMAN | K.SPSVDKYN*VSGTN*GTCLLASMGLQ<br>LN*LTyer.K   | N223N228N241 |
| 663 | LAMP1_HUMAN | K.SPSVDKYNVSGTN*GTCLLASMGLQ^LN*<br>LTYER.K   | N228N241     |
| 664 | LAMP1_HUMAN | K.SPSVDKYN*VSGTN*GTCLLASMGLQ<br>^LN*LTyer.K  | N223N228N241 |
| 665 | LAMP1_HUMAN | K.SPSVDKYN*VSGTN*GTCLLASM#GL<br>QLN*LTyer.K  | N223N228N241 |
| 666 | LAMP1_HUMAN | K.SPSVDKYN*VSGTN*GTCLLASM#GL<br>Q^LN*LTyer.K | N223N228N241 |
| 667 | LAMP1_HUMAN | K.SPSVDKYN*VSGTN*GTCLLASMGLQ<br>LN*LTyerK.D  | N223N228N241 |
| 668 | LAMP1_HUMAN | K.SPSVDKYN*VSGTN*GTCLLASMGLQ<br>^LN*LTyerK.D | N223N228N241 |
| 669 | LAMP1_HUMAN | K.SPSVDKYN*VSGTN*GTCLLASM#GL<br>Q^LNLTYERK.D | N223N228     |
| 670 | LAMP1_HUMAN | K.SPSVDKYN*VSGTN*GTCLLASM#GL                 | N223N228N241 |

|     |            |                                 |          |
|-----|------------|---------------------------------|----------|
|     | N          | QLN*LTYERK.D                    |          |
| 671 | LAMP1_HUMA | R.CVSGTQVHMNNVTVTLHDATIQAAYLS   |          |
|     | N          | N*SSFSR.G                       | N181     |
| 672 | LAMP1_HUMA | R.CVSGTQVHMNNVTVTLHDATIQA^AYL   |          |
|     | N          | SN*SSFSR.G                      | N181     |
| 673 | LAMP1_HUMA | R.CVSGTQVHMNN*VTVTLHDATIQAAYL   |          |
|     | N          | SN*SSFSR.G                      | N165N181 |
| 674 | LAMP1_HUMA | R.CVSGTQVHM#NN*VTVTLHDATIQAAY   |          |
|     | N          | LSN*SSFSR.G                     | N165N181 |
| 675 | LAMP1_HUMA | R.CVSGTQVHM#NN*VTVTLHDATIQA^A   |          |
|     | N          | YLSN*SSFSR.G                    | N165N181 |
| 676 | LAMP1_HUMA | K.DN*TTVTR.L                    | N249     |
|     | N          |                                 |          |
| 677 | LAMP1_HUMA | K.EN*TSDPSLVIAFGR.G             | N84      |
|     | N          |                                 |          |
| 678 | LAMP1_HUMA | K.SPSVDKYN*VSGTNGTCLLASMGLQ^    |          |
|     | N          | LN*LTYERK.D                     | N223N241 |
| 679 | LAMP1_HUMA | K.SPSVDKYN*VSGTNGTCLLASM#GLQ    |          |
|     | N          | ^LN*LTYERK.D                    | N223N241 |
| 680 | LAMP1_HUMA | K.N*MTFDLPSDATVVVLR.S           | N62      |
|     | N          |                                 |          |
| 681 | LAMP1_HUMA | K.SPSVDKYN*VSGTNGTCLLASMGLQ^    |          |
|     | N          | LN*LTYERK                       | N223N241 |
| 682 | LAMP1_HUMA | K.SPSVDKYNVSGTN*GTCLLASMGLQ^    |          |
|     | N          | LN*LTYERK.D                     | N228N241 |
| 683 | LAMP2_HUMA | K.WQMN*FTVR.Y                   | N49      |
|     | N          |                                 |          |
| 684 | LAMP2_HUMA | K.WQM#N*FTVR.Y                  | N49      |
|     | N          |                                 |          |
| 685 | LAMP2_HUMA | R.YETTN*KTYK.T                  | N58      |
|     | N          |                                 |          |
| 686 | LAMP2_HUMA | K.IAVQFGPGFSWIAN*FTK.A          | N101     |
|     | N          |                                 |          |
| 687 | LAMP2_HUMA | K.VASVININPN*TTHSTGSCR.S        | N257     |
|     | N          | K.EKPEAGTYSVN^NGNDTCLLATMGLQ    |          |
| 688 | LAMP2_HUMA | LNITQDKVASVIN^IN^PN*TTHSTGSCR.  |          |
|     | N          | S                               | N257     |
|     | N          | K.EKPEAGTYSVN^NGNDTCLLATMGLQ    |          |
| 689 | LAMP2_HUMA | LNITQ^DKVASVIN^IN^PN*TTHSTGSCR. |          |
|     | N          | S                               | N226     |



|     |             |                                                                         |          |
|-----|-------------|-------------------------------------------------------------------------|----------|
| 690 | LAMP2_HUMAN | K.EKPEAGTYSVN^N^GNDTCLLATMGL<br>QLNITQ^DKVASVIN^IN^PN*TTHSTGSC<br>R.S   | N226     |
| 691 | LAMP2_HUMAN | K.EKPEAGTYSVNNNGNDTCLLATM#GLQ<br>LNITQDKVASVIN^IN^PN*TTHSTGSCR.<br>S    | N257     |
| 692 | LAMP2_HUMAN | K.EKPEAGTYSVN^N^GNDTCLLATM#GL<br>QLNITQ^DKVASVIN^IN^PN*TTHSTGSC<br>R.S  | N226     |
| 693 | LAMP2_HUMAN | K.EKPEAGTYSVN^N^GN*DTCLLATM#<br>GLQ^LNITQDKVASVININ^PN*TTHSTGS<br>CR.S  | N229N240 |
| 694 | LAMP2_HUMAN | K.EKPEAGTYSVN^N^GN*DTCLLATM#<br>GLQ^LNITQDKVASVIN^IN^PN*TTHSTG<br>SCR.S | N229N240 |
| 695 | LAMP2_HUMAN | R.LN*SSTIK.Y                                                            | N275     |
| 696 | LAT1_HUMAN  | K.SADGSAPAGEGEGVTLQRN*ITLLN^G<br>VAIIVGTIIGSGIFVTPTGVLK.E               | N49      |
| 697 | LCAP_HUMAN  | R.SALLEFACTHNLGN*CSTTAMK.L                                              | N834     |
| 698 | LCAP_HUMAN  | R.SALLEFACTHNLGN*CSTTAM#K.L                                             | N834     |
| 699 | LEG1_HUMAN  | K.DSNN*LCLHFNPR.F                                                       | N41      |
| 700 | LG3BP_HUMAN | R.DAGVVCTN*ETR.S                                                        | N125     |
| 701 | LG3BP_HUMAN | K.AAIPSALDTN*SSK.S                                                      | N551     |
| 702 | LG3BP_HUMAN | R.ALGFEN*ATQALGR.A                                                      | N69      |
| 703 | LG3BP_HUMAN | K.GLN*LTEDTYKPR.I                                                       | N398     |
| 704 | LG3BP_HUMAN | R.TVIRPFYLTN*SSGVD.-                                                    | N580     |
| 705 | LG3BP_HUMAN | R.YKGLN*LTEDTYKPR.I                                                     | N398     |
| 706 | LGMN_HUMAN  | K.SHTN*TSHVM#QYGN*K.T                                                   | N263N272 |
| 707 | LIMA1_HUMAN | K.ELSLVN^KN*K.S                                                         | N29      |
| 708 | LIPL_HUMAN  | R.TPEDTAEDTCHLIPGVAESVATCHFN*<br>HSSK.T                                 | N70      |
| 709 | LMAN2_HUMAN | R.VFPYISVMVNN*GSLSYDHDKDGR.W                                            | N183     |

|     |            |                                        |          |
|-----|------------|----------------------------------------|----------|
|     | N          |                                        |          |
| 710 | LMAN2_HUMA |                                        |          |
|     | N          | R.VFPYISVM#VNN*GSLSYDHSKDGR.W          | N183     |
| 711 | LRP1_HUMAN | R.FGTCSQLCN*NTK.G                      | N3839    |
| 712 | LRP1_HUMAN | R.VNRFN*STEYQVVTR.V                    | N446     |
| 713 | LRP1_HUMAN | R.AFIN*GTGVETVVSADLPNAHGLAVD<br>WVSR.N | N1645    |
| 714 | LRRF2_HUMA |                                        |          |
|     | N          | R.NSASATPLSGN*SSR.R                    | N322     |
| 715 | LUZP1_HUMA |                                        |          |
|     | N          | R.GHVLGN*GSQVTQAANS GCSK.A             | N548     |
| 716 | LY6K_HUMAN | R.YCNLEGPIN*SSVFK.E                    | N129     |
| 717 | LYAG_HUMA  |                                        |          |
|     | N          | R.GVFITN*ETGQPLIGK.V                   | N470     |
| 718 | M0QYR6_HUM |                                        |          |
|     | AN         | K.GN*STHGCSSEETFLIDCR.G                | N197     |
| 719 | M0QYR6_HUM | R.GCGYLPGCPGSGNFHN^N*DTFHFLK.          |          |
|     | AN         | C                                      | N159     |
| 720 | M0QYV1_HUM |                                        |          |
|     | AN         | K.TNALN*VSQ^KM#IEMFVRTK.H              | N59      |
| 721 | M0QZG6_HUM |                                        |          |
|     | AN         | R.WWHQQTN*ATQEVVR.D                    | N142     |
| 722 | MET_HUMAN  | R.FINFFVGNTIN*SSYFPDHPLHSISVR.R        | N202     |
| 723 | MET_HUMAN  | K.AN*LSGGVWK.D                         | N106     |
| 724 | MET_HUMAN  | R.N*FTVACQHR.S                         | N785     |
| 725 | MET_HUMAN  | R.MVINVHEAGR N*FTVACQHR.S              | N785     |
| 726 | MINP1_HUMA |                                        |          |
|     | N          | K.FLTEVEKN*ATALYHVEAFK.T               | N242     |
| 727 | MPRD_HUMA  |                                        |          |
|     | N          | R.LKPLFN*K.S                           | N57      |
| 728 | MPRD_HUMA  |                                        |          |
|     | N          | R.EAGN*HTSGAGLVQINK.S                  | N83      |
| 729 | MPRD_HUMA  |                                        |          |
|     | N          | R.LN*ETHIFNGSN^WIMLIYK.G               | N107     |
| 730 | MPRD_HUMA  |                                        |          |
|     | N          | R.LN*ETHIFN*GSNWIM#LIYK.G              | N107N113 |
| 731 | MPRI_HUMAN | K.MN*FTGGDTCHK.V                       | N1312    |
| 732 | MPRI_HUMAN | R.MSVINFE CN*KTAGNDGK.G                | N435     |
| 733 | MPRI_HUMAN | K.TN*ITLVCKPGDLESAPVLR.T               | N581     |
| 734 | MPRI_HUMAN | K.GYPCGGN*KTASSVIELTCTK.T              | N2085    |
| 735 | MPRI_HUMAN | R.SLLEFN*TTVSCDQQGTNHR.V               | N112     |

|     |                 |                                        |              |
|-----|-----------------|----------------------------------------|--------------|
| 736 | MPRI_HUMAN      | K.IKTN*ITLVCKPGDLESAPVLR.T             | N581         |
| 737 | MPRI_HUMAN      | R.AACAVKQPQEVQMVN*GTITNPIN^GK.<br>S    | N2136        |
| 738 | MPRI_HUMAN      | R.DPNSGFVFNLN^PLNSSQGYN*VSGIG<br>K.I   | N957         |
| 739 | MPRI_HUMAN      | K.TGPVVEDSGSLLLEYVN*GSACTTSD<br>GR.Q   | N871         |
| 740 | MPRI_HUMAN      | K.M#N*FTGGDTCHK.V                      | N1312        |
| 741 | MPRI_HUMAN      | R.M#SVINFECN*KTAGNDGK.G                | N435         |
| 742 | MPRI_HUMAN      | R.N*GSSIVDLSPLIHR.T                    | N1656        |
| 743 | MPZL1_HUMA<br>N | K.EIFVAN*GTQGK.L                       | N50          |
| 744 | MRC2_HUMAN      | R.TSN*ISKPGTLER.G                      | N140         |
| 745 | MRC2_HUMAN      | R.WNDSPCN*QSLPSICK.K                   | N497         |
| 746 | MRC2_HUMAN      | R.WNDSPCN*QSLPSICKK.A                  | N497         |
| 747 | MRC2_HUMAN      | R.N*ASLAYVPDPYTQAFLTQAAR.G             | N1157        |
| 748 | MRC2_HUMAN      | K.GTDPSLSPSPAALPPAPGTELSYLN*GT<br>FR.L | N1134        |
| 749 | MSLN_HUMA<br>N  | R.KWN*VTSLETLK.A                       | N388         |
| 750 | MSLN_HUMA<br>N  | R.LAFQNM#N*GSEYFVK.I                   | N496         |
| 751 | MSLN_HUMA<br>N  | R.LAFQNMN*GSEYFVK.I                    | N496         |
| 752 | MUC16_HUMA<br>N | R.KFN*TTER.V                           | N12414       |
| 753 | MUC16_HUMA<br>N | K.N*TSVGPLYSGCR.L                      | N12272       |
| 754 | MUC16_HUMA<br>N | R.N*GTQLQN*FTLDR.S                     | N14417N14423 |
| 755 | MUC16_HUMA<br>N | R.KFN*ITESVLQGLLKPLFK.S                | N13193       |
| 756 | MUC16_HUMA<br>N | R.VLQGLLGPLFKN*SSVGPLYSGCR.L           | N13053       |
| 757 | MUC16_HUMA<br>N | R.VLQGLLGPIFKN*TSVGPLYSGCR.L           | N12430       |
| 758 | MUC16_HUMA<br>N | R.VLQSLGPMFKN*TSVGPLYSGCR.L            | N12741       |
| 759 | MUC16_HUMA<br>N | R.VLQSLGPM#FKN*TSVGPLYSGCR.L           | N12741       |
| 760 | MUC16_HUMA      | R.VLQGLLRPVFKN*TSVGPLYSGCR.L           | N13521       |

|     |             |                                                      |              |
|-----|-------------|------------------------------------------------------|--------------|
|     | N           |                                                      |              |
| 761 | MUC16_HUMAN | R.GM#THSEQ^RTSPSLSPQ^VN*GTPSRN<br>^YPATSM#VSGLSSPR.T | N110         |
| 762 | MUC16_HUMAN | R.VLQGLLRPLFKN*TSVGPLYSGCR.L                         | N13832       |
| 763 | MUC18_HUMAN | K.CGLSQSQGN*LSHVDWFSVHK.E                            | N56          |
| 764 | MUC18_HUMAN | R.CVASVPSIPGLN*R.T                                   | N418         |
| 765 | MYCT_HUMAN  | R.ITFKPIAPSGQN*ATCTR.Y                               | N433         |
| 766 | NEGR1_HUMAN | K.GAWLN*R.S                                          | N73          |
| 767 | NEGR1_HUMAN | R.SILTVTN*VTQEHFGN*YTCVAANK.L                        | N286N294     |
| 768 | NEGR1_HUMAN | R.SILTVTNVTQEHFGN*YTCVAAN^K.L                        | N294         |
| 769 | NICA_HUMAN  | K.IYIPLN*K.T                                         | N45          |
| 770 | NICA_HUMAN  | R.KIYIPLN*K.T                                        | N45          |
| 771 | NICA_HUMAN  | K.AN*N^SWFQSILR.Q                                    | N530         |
| 772 | NICA_HUMAN  | R.ARN*ISGVVLADHSGAFHNK.Y                             | N435         |
| 773 | NICA_HUMAN  | R.TSLELWM#HTDPVSQKN*ESVR.N                           | N387         |
| 774 | NICA_HUMAN  | R.ALYELAGGTN*FSDTVQADPQTVTR.L                        | N506         |
| 775 | NICA_HUMAN  | R.ALYELAGGTN*FSDTVQ^ADPQTVTR.<br>L                   | N506         |
| 776 | NICA_HUMAN  | R.SYLGDGPLQ^HYIAVSSPTN*TTYVVQ<br>YALAN*LTGTVVN*LTR.E | N562N573N580 |
| 777 | NICA_HUMAN  | R.TSLELWMHTDPVSQKN*ESVR.N                            | N387         |
| 778 | NICA_HUMAN  | R.SYLGDGPLQHYIAVSSPTNTTYVVQ^Y<br>ALAN*LTGTVVN*LTR.E  | N573N580     |
| 779 | NOTC2_HUMAN | R.DGYEPCVNEGM#CVTYHN*GTGYCK.<br>C                    | N46          |
| 780 | NPC1_HUMAN  | K.NYKNPN*LTISFTAER.S                                 | N598         |
| 781 | NPC1_HUMAN  | R.VDN*ITDQFCN*ASVVDPAVCR.C                           | N961N968     |
| 782 | NPC1_HUMAN  | R.VDNITDQ^FCN*ASVVDPAVCR.C                           | N968         |
| 783 | NPC1_HUMAN  | K.GQ^NM#VCGGM#GCNNDSLVQQIFNA<br>AQLDN*YTR.I          | N931         |
| 784 | NPC1_HUMAN  | K.GQ^NM#VCGGM#GCNNDSLVQQIFNA<br>AQ^LDN*YTR.I         | N931         |
| 785 | NPTN_HUMAN  | K.AN*ATIEVK.A                                        | N229         |
| 786 | NPTN_HUMAN  | R.KN*ASNMEYR.I                                       | N197         |

|     |             |                                       |          |
|-----|-------------|---------------------------------------|----------|
| 787 | NPTN_HUMAN  | R.KKEN^GM#PMDIVN*TSGR.F               | N284     |
| 788 | NPTN_HUMAN  | R.KN*ASN#EYR.I                        | N197     |
| 789 | NPTN_HUMAN  | R.KKEN^GM#PM#DIVN*TSGR.F              | N284     |
| 790 | NPTX1_HUMAN | R.LN*SSSQTNSLK.D                      | N154     |
| 791 | NRP1_HUMAN  | K.RGPECSQN*YTTPSGVIK.S                | N150     |
| 792 | OSMR_HUMAN  | K.NVGPN*TTSTVISTDAFRPGVR.Y            | N580     |
| 793 | OSTM1_HUMAN | R.AAGN*TSESQSCAR.S                    | N135     |
| 794 | OSTM1_HUMAN | R.ELLLDFAN*SSAELTGCLVR.S              | N93      |
| 795 | P3H1_HUMAN  | K.LLN*GSQR.V                          | N467     |
| 796 | P3H1_HUMAN  | K.VPLQSAHLYYN*VTEK.V                  | N540     |
| 797 | P3H1_HUMAN  | K.LGQEGKVPLQSAHLYYN*VTEK.V            | N540     |
| 798 | P3H2_HUMAN  | R.EGGPLYEN*ITFVYNSEQLN*GTQR.V         | N449N460 |
| 799 | P4HA1_HUMAN | K.DMSDGFISN*LTIQR.Q                   | N113     |
| 800 | P4HA2_HUMAN | K.RLNTDWPALDVLQDSAAGFIAN*L<br>SVQR.Q  | N115     |
| 801 | P4HA2_HUMAN | K.TLTN*Q^TEAELATPEGIYERPVDYLPE<br>R.D | N264     |
| 802 | P4HTM_HUMAN | K.LVAN*ESVPFETSCR.Y                   | N348     |
| 803 | PBIP1_HUMAN | K.LQGLENWGQDPGVSAN*ASK.A              | N455     |
| 804 | PCFT_HUMAN  | R.FSADLGYN*GTR.Q                      | N58      |
| 805 | PCYOX_HUMAN | K.LLHALGGDDFLGMLN*R.T                 | N196     |
| 806 | PCYOX_HUMAN | K.LLHALGGDDFLGM#LN*R.T                | N196     |
| 807 | PDIA3_HUMAN | K.VDCTANTN*TCNK.Y                     | N90      |
| 808 | PDS5B_HUMAN | R.WLLGMKNN*HSK.S                      | N842     |
| 809 | PDXL2_HUMAN | R.SLEEIGIQN*YSTTSSCQAR.A              | N480     |
| 810 | PDXL2_HUMAN | R.RSLEEIGIQN*YSTTSSCQAR.A             | N480     |
| 811 | PGBM_HUMAN  | R.SLTQGSIVGDLAPVN*GTSQGK.F            | N3780    |
| 812 | PGBM_HUMAN  | R.ACTEAEFACHSYN*ECVALEYR.C            | N210     |

|     |                 |                                             |       |
|-----|-----------------|---------------------------------------------|-------|
|     | N               |                                             |       |
| 813 | PGBM_HUMA<br>N  | R.IQGEEIVFHDLN*LTAHGISHCPTCR.D              | N3836 |
| 814 | PGBM_HUMA<br>N  | R.NLHQSN*TSR.A                              | N1755 |
| 815 | PGBM_HUMA<br>N  | R.ALVN*FTR.S                                | N89   |
| 816 | PGBM_HUMA<br>N  | R.NLHQSN*TSRAELLVTEAPSKPITVTV<br>EEQR.S     | N1755 |
| 817 | PGLT1_HUMA<br>N | K.FLSYN*VTR.R                               | N373  |
| 818 | PGLT1_HUMA<br>N | R.SLENYEPCSSQ^N*CSCYHGVIEEDLTP<br>FR.G      | N53   |
| 819 | PGLT1_HUMA<br>N | R.SLENYEPCSSQN*CSCYHGVIEEDLTPF<br>R.G       | N53   |
| 820 | PIGS_HUMAN      | K.TYN*ASVLPVRVEVDMVR.V                      | N370  |
| 821 | PIN1_HUMAN      | R.VYYFNHITN*ASQWERPSGNSSSGGK<br>NGQGEPAR.V  | N30   |
| 822 | PIN1_HUMAN      | R.VYYFNHITN*ASQWERPSGNSSSGGK<br>NGQ^GEPAR.V | N30   |
| 823 | PLGT2_HUMA<br>N | K.N*STAVWR.G                                | N302  |
| 824 | PLGT3_HUMA<br>N | R.YFYLQAVNSEGQN*LTR.S                       | N61   |
| 825 | PLGT3_HUMA<br>N | R.KVN*GTPSPIIISWCGSLDSR.D                   | N251  |
| 826 | PLGT3_HUMA<br>N | R.GVTNDLLSIQGNTGPSWIN*KTER.A                | N306  |
| 827 | PLOD1_HUMA<br>N | R.YN*CSIR.A                                 | N686  |
| 828 | PLOD1_HUMA<br>N | R.EQIN*ITLDHR.C                             | N197  |
| 829 | PLOD1_HUMA<br>N | R.FLGSGGFIGYAPN*LSK.L                       | N163  |
| 830 | PLOD1_HUMA<br>N | K.YIHQN*YTK.A                               | N538  |
| 831 | PLOD2_HUMA<br>N | K.YFN*YTVK.V                                | N63   |
| 832 | PLOD2_HUMA<br>N | R.YN*CSIESPR.K                              | N696  |
| 833 | PLOD2_HUMA      | R.EAIN*ITLDHK.C                             | N209  |

|     |            |                               |            |
|-----|------------|-------------------------------|------------|
|     | N          |                               |            |
| 834 | PLOD2_HUMA |                               |            |
|     | N          | R.LTHLHEGLPVKN*GTR.Y          | N725       |
| 835 | PLOD3_HUMA |                               |            |
|     | N          | R.SAEFFN*YTVR.T               | N63        |
| 836 | PLOD3_HUMA | R.YDTEHLHPDLWQ^IFDNPVDWKEQ^Y  | N548       |
|     | N          | IHEN*YSR.A                    |            |
| 837 | PLXB2_HUMA |                               |            |
|     | N          | R.ALSN*ISLR.L                 | N127       |
| 838 | PLXB2_HUMA |                               |            |
|     | N          | K.LHVTLYN*CSFGR.S             | N759       |
| 839 | PLXB2_HUMA |                               |            |
|     | N          | K.SCVAVTSAQPQN*M#SR.R         | N528       |
| 840 | PLXB2_HUMA |                               |            |
|     | N          | K.LSHDAN*ETLPLHLYVK.S         | N733       |
| 841 | PLXB2_HUMA |                               |            |
|     | N          | R.TEAGAFEYVPDPTFEN*FTGGVK.K   | N1099      |
| 842 | PLXB2_HUMA |                               |            |
|     | N          | R.TEAGAFEYVPDPTFEN*FTGGVKK.Q  | N1099      |
| 843 | PLXB2_HUMA | R.GGLN*LTAVTVAAEN^NHTVAFLGTS  |            |
|     | N          | DGR.I                         | N391       |
| 844 | PLXB2_HUMA | R.GGLN*LTAVTVAAENN*HTVAFLGTS  |            |
|     | N          | DGR.I                         | N391N402   |
| 845 | PLXD1_HUMA | K.VLN*STLITCSPGALSN*ASAPVDFFI |            |
|     | N          | N^GR.A                        | N1118N1132 |
| 846 | PO210_HUMA |                               |            |
|     | N          | K.GPTN*NTCVVR.T               | N1441      |
| 847 | PO210_HUMA |                               |            |
|     | N          | R.VN*FTLEASEGCYR.W            | N44        |
| 848 | PO210_HUMA |                               |            |
|     | N          | R.EGSGYFFLN*TSTADVVK.V        | N926       |
| 849 | PO210_HUMA |                               |            |
|     | N          | R.ATRVN*FTLEASEGCYR.W         | N44        |
| 850 | PO210_HUMA |                               |            |
|     | N          | R.IREGSGYFFLN*TSTADVVK.V      | N926       |
| 851 | PO210_HUMA |                               |            |
|     | N          | R.IETVLPAEFFEVLSQQN*GSYHR.I   | N405       |
| 852 | PO210_HUMA |                               |            |
|     | N          | R.DDFVQIGKGPTN*NTCVVR.T       | N1441      |
| 853 | PO210_HUMA |                               |            |
|     | N          | R.LPN*STIYVVEPGYLGFTVHPGDR.W  | N337       |

|     |              |                                |        |
|-----|--------------|--------------------------------|--------|
| 854 | PODXL_HUMAN  | K.QLVLN*LTGNTLCAGGASDEK.L      | N360   |
| 855 | PODXL_HUMAN  | K.QLVLN*LTGNTLCAGGASDEKLISLIC  | N360   |
| 856 | PPBT_HUMAN   | R.SRCN*TTQGNEVTSILR.W          | N140   |
| 857 | PPIA_HUMAN   | K.HTGPGILSMANAGPNTN*GSQFFICTA  | N108   |
| 858 | PPIA_HUMAN   | K.HTGPGILSMAN^AGPNTN*GSQFFICT  | N108   |
| 859 | PPIA_HUMAN   | K.HTGPGILSMANAGPN^TN*GSQFFICT  | N108   |
| 860 | PPIA_HUMAN   | K.HTGPGILSM#ANAGPNTN*GSQFFICT  | N108   |
| 861 | PPIA_HUMAN   | K.HTGPGILSM#ANAGPN^TN*GSQFFICT | N108   |
| 862 | PPIC_HUMAN   | K.VIDGMTVVHSIELQATDGHDRPLTN*   | N190   |
| 863 | PPIC_HUMAN   | K.VIDGM#TVVHSIELQATDGHDRPLTN*  | N190   |
| 864 | PPIC_HUMAN   | K.VIDGM#TVVHSIELQ^ATDGHDRPLTN* | N190   |
| 865 | PPIC_HUMAN   | K.VIDGMTVVHSIELQATDGHDRPLTN*   | N190   |
| 866 | PROF1_HUMAN  | CSIIN^SGK.I                    |        |
| 867 | PRS8_HUMAN   | K.STGGAPTFN*VTVTK.T            | N100   |
| 868 | PTK7_HUMAN   | R.KM#N*LTR.G                   | N337   |
| 869 | PTK7_HUMAN   | R.SAN*ASFNIK.W                 | N116   |
| 870 | PTPRF_HUMAN  | R.RQDVN*ITVATVPSWLK.K          | N405   |
| 871 | PTPRK_HUMAN  | R.KVEVEPLN*STAVHVVYWK.L        | N721   |
| 872 | PXDC2_HUMAN  | R.IAVDWESLGYN*ITR.C            | N416   |
| 873 | PXDN_HUMAN   | R.VN*LSFDFPFYGHFLR.E           | N160   |
| 874 | PXDN_HUMAN   | R.ILCDNADN*ITR.V               | N1280  |
| 875 | Q5TB19_HUMAN | R.VYCN*LSAAHTFEDLKNEIKNPEIR.E  | N1178  |
| 876 | Q69YM1_HUMAN | R.KLELSDNIISGGLEVLAEKCPN*LTYL  | N89N94 |
| 877 | QCR2_HUMAN   | N*LSGNK.I                      |        |
|     |              | K.M#LSAFN*ATSGK.A              | N13    |
|     |              | K.ATAAPAGAPPQ^PQDLEFTKLPNGLVI  | N54    |



|     |             |                                                           |       |
|-----|-------------|-----------------------------------------------------------|-------|
|     |             | ASLEN*YSPVSR.I                                            |       |
| 878 | QCR2_HUMAN  | K.ATAAPAGAPPQPQDLEFTKLPNGLVIA<br>SLEN*YSPVSR.I            | N54   |
| 879 | QCR2_HUMAN  | K.ATAAPAGAPPQPQ^DLEFTKLPNGLVI<br>ASLEN*YSPVSR.I           | N54   |
| 880 | QCR2_HUMAN  | K.ATAAPAGAPPQPQDLEFTKLPN^GLVI<br>ASLEN*YSPVSR.I           | N54   |
| 881 | RAE1L_HUMAN | R.SN*GTNTSAPQ^DIYAVNGIAFHPVHG<br>TLATVGS DGR.F            | N263  |
| 882 | RAE1L_HUMAN | R.SNGTN*TSAPQDIYAVN^GIAFHPVHG<br>TLATVGS DGR.F            | N266  |
| 883 | RAE1L_HUMAN | R.SN*GTNTSAPQDIYAVN^GIAFHPVHG<br>TLATVGS DGR.F            | N263  |
| 884 | RAI14_HUMAN | K.LM#QLTN*VSRAKAEDALSEMK.S                                | N689  |
| 885 | RAI14_HUMAN | R.RAELVCLN*NTEISENSSDLSQK.L                               | N470  |
| 886 | RCC2_HUMAN  | K.AAAAAWEEPSSGN*GTAR.A                                    | N18   |
| 887 | RCN1_HUMAN  | R.VVRPDELGERPPEDN*QSFQYDHEAF<br>LGK.E                     | N53   |
| 888 | RCN1_HUMAN  | R.VVRPDELGERPPEDN*Q^SFQYDHEA<br>FLGK.E                    | N53   |
| 889 | RCN1_HUMAN  | R.VVRPDELGERPPEDN*Q^SFQYDHEA<br>FLGKEDSK.T                | N53   |
| 890 | RFA1_HUMAN  | K.IGNPVPYNEGLGQPQVAPPAPAASPA<br>ASSRPQPQ^N*GSSGM#GSTVSK.A | N146  |
| 891 | RIF1_HUMAN  | R.KTSTECASSTENSFVSSSSVSN*TTVA<br>GTPPYPTSR.R              | N1204 |
| 892 | RL26_HUMAN  | K.AN*GTTVHVGIHPK.V                                        | N91   |
| 893 | RL4_HUMAN   | R.SGQGAFGN*M#CR.G                                         | N94   |
| 894 | RPN2_HUMAN  | R.SNLDPSNVDSL FYAAQASQALSGCEIS<br>ISN*ETK.D               | N106  |
| 895 | RS7_HUMAN   | R.ELN*ITA AK.E                                            | N44   |
| 896 | S39A6_HUMAN | R.KTN*ESVSEPR.K                                           | N241  |
| 897 | S39A6_HUMAN | R.NTNENPQECFN*ASK.L                                       | N266  |
| 898 | S39A6_HUMAN | K.LLTSHGMGIQVPLN*ATEFN YLCPAII<br>NQIDAR.S                | N283  |
| 899 | S39A6_HUMAN | K.LLTSHGM#GIQVPLN*ATEFN YLCPAII<br>NQIDAR.S               | N283  |
| 900 | S39AA_HUMAN | R.KDLNEDDHHHECLN*VTQLLK.Y                                 | N339  |

|     |             |                                                          |      |
|-----|-------------|----------------------------------------------------------|------|
| 901 | SAP_HUMAN   | K.TCDWLPKPN*MSASCK.E                                     | N101 |
| 902 | SAP_HUMAN   | K.TCDWLPKPN*M#SASCK.E                                    | N101 |
| 903 | SAP_HUMAN   | R.NLEKN*STKQEILAALEK.G                                   | N426 |
| 904 | SAP_HUMAN   | K.LIDNN*KTEKEILDAFDK.M                                   | N332 |
| 905 | SAP_HUMAN   | R.TN*STFVQALVEHVKEECDRLGPGM#<br>ADICK.N                  | N215 |
| 906 | SAP_HUMAN   | R.TN*STFVQALVEHVKEECDR.L                                 | N215 |
| 907 | SAP_HUMAN   | K.SLPCDICKDVVTAAGDM#LKDN*ATE<br>EEILVYLEK.T              | N80  |
| 908 | SAP_HUMAN   | R.TN*STFVQALVEHVK.E                                      | N215 |
| 909 | SAP_HUMAN   | R.TN*STFVQ^ALVEHVKEECDRLGPGM<br>#ADICK.N                 | N215 |
| 910 | SAP_HUMAN   | K.SLPCDICKDVVTAAGDMLKDN*ATEE<br>EILVYLEK.T               | N80  |
| 911 | SCAR3_HUMAN | R.N*VTILR.G                                              | N451 |
| 912 | SCAR3_HUMAN | K.IVTDWQN*YTR.L                                          | N257 |
| 913 | SCAR3_HUMAN | K.ALNN*CSFCHEAGQLGPEIR.K                                 | N115 |
| 914 | SCAR3_HUMAN | R.M#ASHEIEIGTIFTNIN*ATDNHVHSM#<br>LK.Y                   | N365 |
| 915 | SE1L1_HUMAN | R.EASIVGEN*ETYPR.A                                       | N608 |
| 916 | SE1L1_HUMAN | K.MYSEGSDIVPQSN*ETALHYFK.K                               | N431 |
| 917 | SE1L1_HUMAN | K.M#YSEGSDIVPQSN*ETALHYFK.K                              | N431 |
| 918 | SE1L1_HUMAN | R.AFDYFN^LAANAGNSHAM#AFLGKM#<br>YSEGSDIVQ^SN*ETALHYFKK.A | N431 |
| 919 | SEM3C_HUMAN | R.VIQTFN*R.T                                             | N123 |
| 920 | SGO2_HUMAN  | K.QITN^MYPVQ^QN*ESKVN^K.K                                | N704 |
| 921 | SIL1_HUMAN  | R.LINKFN*SSSSLEEK.I                                      | N193 |
| 922 | SL7A1_HUMAN | R.LCLNN*DTK.E                                            | N235 |
| 923 | SL7A1_HUMAN | K.NWQLTEEDFGN*TSGR.L                                     | N226 |
| 924 | SMC4_HUMAN  | R.FSCIIGPN*GSGK.S                                        | N115 |
| 925 | SO2A1_HUMAN | K.QLIYLN*CSCVTGGSASAK.T                                  | N491 |

|     |             |                                                |      |
|-----|-------------|------------------------------------------------|------|
| 926 | SORT_HUMAN  | R.HLYTTTGGGETDFTN*VTSLR.G                      | N406 |
| 927 | SRSF3_HUMAN | K.VYVGNLGNNGN*KTELER.A                         | N22  |
| 928 | SRSF3_HUMAN | K.VYVGNLGNNGN*K.T                              | N22  |
| 929 | SSRB_HUMAN  | R.IAPASN*VSHTVVLRLPK.A                         | N88  |
| 930 | SSRB_HUMAN  | K.AGYFN*FTSATITYLAQEDGPVVGST<br>SAPGQGGILAQR.E | N104 |
| 931 | STT3A_HUMAN | R.TILVDNNTWN*NTHISR.V                          | N548 |
| 932 | STT3A_HUMAN | R.TILVDN*NTWNN^THISR.V                         | N544 |
| 933 | STT3A_HUMAN | K.VMSWWDYGYQITAMAN*R.T                         | N537 |
| 934 | STT3A_HUMAN | R.TILVDNNTWN*N^THISR.V                         | N548 |
| 935 | STT3A_HUMAN | R.TILVDNN^TWN*NTHISR.V                         | N548 |
| 936 | STT3B_HUMAN | K.AMSSN*ETAAYK.I                               | N641 |
| 937 | STT3B_HUMAN | K.AM#SSN*ETAAYK.I                              | N641 |
| 938 | STT3B_HUMAN | R.VMSWWDYGYQIAGMAN*R.T                         | N616 |
| 939 | STT3B_HUMAN | R.VM#SWWDYGYQIAGMAN*R.T                        | N616 |
| 940 | STT3B_HUMAN | R.VMSWWDYGYQIAGM#AN*R.T                        | N616 |
| 941 | STT3B_HUMAN | R.VM#SWWDYGYQIAGM#AN*R.T                       | N616 |
| 942 | STT3B_HUMAN | R.TTLVDNNTWN*NSHIALVGK.A                       | N627 |
| 943 | STT3B_HUMAN | R.TTLVDNNTWN*N^SHIALVGK.A                      | N627 |
| 944 | STT3B_HUMAN | R.TTLVDNN^TWN*NSHIALVGK.A                      | N627 |
| 945 | STT3B_HUMAN | R.VM#SWWDYGYQ^IAGM#AN*R.T                      | N616 |
| 946 | SYEP_HUMAN  | K.TGQEYKPGNPPAEIGQNISSN*SSASIL<br>ESK.S        | N815 |
| 947 | T132A_HUMAN | R.VQQVGHYPPAN*SSLSSR.S                         | N71  |

|     |             |                                                     |      |
|-----|-------------|-----------------------------------------------------|------|
|     | N           |                                                     |      |
| 948 | TBA1C_HUMAN | R.ECISIHVGQAGVQIGN*ACWELYCLEH<br>GIQPDGQM#PSDK.T    | N18  |
|     |             | -                                                   |      |
| 949 | TBA1C_HUMAN | .M#RECISIHVGQAGVQIGN*ACWELYCL<br>EHGIQPDGQM#PSDK.T  | N18  |
| 950 | TBA1C_HUMAN | R.ECISIHVGQAGVQIGN*ACWELYCLEH<br>GIQPDGQMPSDK.T     | N18  |
|     |             | -                                                   |      |
| 951 | TBA1C_HUMAN | .MRECISIHVGQAGVQIGN*ACWELYCL<br>EHGIQPDGQMPSDK.T    | N18  |
| 952 | TBA1C_HUMAN | R.ECISIHVGQ^AGVQ^IGN*ACWELYCL<br>EHGIQ^PDGQMPSDK.T  | N18  |
| 953 | TBA4A_HUMAN | K.AYHEQLSVAEITN*ACFEPANQM#VK.<br>C                  | N293 |
| 954 | TBA4A_HUMAN | R.AVCMLSN*TTAIAEAWAR.L                              | N380 |
| 955 | TBB5_HUMAN  | K.N*SSYFVEWIPNNVK.T                                 | N337 |
| 956 | TBB6_HUMAN  | K.N*SSYFVEWIPNNVK.V                                 | N337 |
| 957 | TCPW_HUMAN  | K.RVEDAFILICN*VSLEYEKTEVNSGFF<br>YK.T               | N234 |
| 958 | TCPZ_HUMAN  | K.RVEDAYILTCN*VSLEYEKTEVNSGFF<br>YK.S               | N234 |
| 959 | TEST_HUMAN  | K.HIQPICLQASTFEFEN*R.T                              | N167 |
| 960 | TFR1_HUMAN  | K.QNN^GAFN*ETLFR.N                                  | N727 |
| 961 | TFR1_HUMAN  | R.KQNNGAFN*ETLFR.N                                  | N727 |
| 962 | TFR1_HUMAN  | R.KQNN^GAFN*ETLFR.N                                 | N727 |
| 963 | TFR1_HUMAN  | R.KQN^NGAFN*ETLFR.N                                 | N727 |
| 964 | TFR1_HUMAN  | R.KQN^N^GAFN*ETLFR.N                                | N727 |
| 965 | TFR1_HUMAN  | K.DFEDLYTPVN*GSIVIVR.A                              | N251 |
| 966 | TFR1_HUMAN  | K.KDFEDLYTPVN*GSIVIVR.A                             | N251 |
| 967 | THY1_HUMAN  | K.VLYLSAFTSKDEGTYTCALHHS<br>GHSP<br>PISSQN*VTVLR.D  | N119 |
| 968 | THY1_HUMAN  | R.SRTN*FTSK.Y                                       | N79  |
| 969 | THY1_HUMAN  | K.DEGTYTCALHHS<br>GHSP<br>PISSQN*VTVL<br>R.D        | N119 |
| 970 | TIF1B_HUMAN | R.LLPCLHSACSACLGPAAPAAAN*SSGD<br>GGAAGDGTVVDCPVCK.Q | N101 |
| 971 | TIMP1_HUMAN | R.SHN*RSEEF<br>LIAGK.L                              | N101 |
| 972 | TKT_HUMAN   | R.M#AAISESNIN*LCGSHCGV<br>SIGEDGPS                  | N411 |

|     |             |                                                    |           |
|-----|-------------|----------------------------------------------------|-----------|
|     |             | QMALEDLAMFR.S                                      |           |
| 973 | TKT_HUMAN   | R.MAAISESNIN*LCGSHCGVSI GEDGPS<br>QM#ALEDLAM#FR.S  | N411      |
| 974 | TKT_HUMAN   | R.M#AAISESNIN*LCGSHCGVSI GEDGPS<br>QM#ALEDLAMFR.S  | N411      |
| 975 | TKT_HUMAN   | R.M#AAISESNIN*LCGSHCGVSI GEDGPS<br>QM#ALEDLAM#FR.S | N411      |
| 976 | TKT_HUMAN   | R.M#AAISESNIN*LCGSHCGVSI GEDGP<br>SQ^MALEDLAMFR.S  | N411      |
| 977 | TLN1_HUMAN  | R.M#VAAATN^N*LCEAANA AVQ^GHAS<br>Q^EK.L            | N2406     |
| 978 | TM2D1_HUMAN | R.LSITN*ETFR.K                                     | N197      |
| 979 | TM2D1_HUMAN | K.INDATQEPVN*CTN*YTAHVSCFPAPN<br>*ITCK.D           | N72N75N87 |
| 980 | TM2D1_HUMAN | K.DSSGN*ETHFTGNEVGFFKPISCR.N                       | N96       |
| 981 | TM2D1_HUMAN | K.INDATQEPVN*CTNYTAHVSCFPAPN*<br>ITCK.D            | N72N87    |
| 982 | TM87A_HUMAN | R.N*TTIFLK.F                                       | N62       |
| 983 | TM87A_HUMAN | K.LFQN*CSELFK.T                                    | N127      |
| 984 | TM9S3_HUMAN | R.IVDVN*LTSEGK.V                                   | N174      |
| 985 | TMED4_HUMAN | R.FTFTSHTPGDHQICLHSN*STR.M                         | N117      |
| 986 | TMED9_HUMAN | R.FTFTSHTPGEHQICLHSN*STK.F                         | N125      |
| 987 | TMTC3_HUMAN | R.AN*ESRLEEADQLYR.Q                                | N541      |
| 988 | TMX3_HUMAN  | K.LVALAVIDEKN*TSVEHTR.L                            | N258      |
| 989 | TNR3_HUMAN  | K.AGHFQN*TSSPSAR.C                                 | N177      |
| 990 | TOR4A_HUMAN | R.FVLQN*ASR.A                                      | N314      |
| 991 | TPBG_HUMAN  | K.VLHN*GTLAELQGLPHIR.V                             | N275      |
| 992 | TPBG_HUMAN  | R.RPPLAELAALN*LSGSRLDEV R.A                        | N124      |
| 993 | TSN13_HUMAN | R.SVNPN*DTCLASCVK.S                                | N137      |
| 994 | TSP1_HUMAN  | K.VVN*STTGPGELHR.N                                 | N1067     |
| 995 | TSP1_HUMAN  | K.KVSCPIMPCSN*ATVPDGECCPR.C                        | N360      |

|      |             |                                                                                     |          |
|------|-------------|-------------------------------------------------------------------------------------|----------|
| 996  | TSP1_HUMAN  | K.KVSCPIM#PCSN*ATVPDGECCPR.C                                                        | N360     |
| 997  | TSP1_HUMAN  | R.NKGCSSSTSVLLTLDNNVVN*GSSPAI                                                       | N248     |
| 998  | TTYH3_HUMAN | R.VWDTAVGLN*HTAEPQLTLER.Q                                                           | N144     |
| 999  | TTYH3_HUMAN | R.VQEVLN*GTEVNLQHLTALVDCR.S                                                         | N351     |
| 1000 | U2AF2_HUMAN | K.N*ATLVSPSTINQTPVTLQVPGLMSS<br>QVQ^MGGHPTEVLCLMN^M#VLPEELL<br>DDEEYEEIVEDVRDECSK.Y | N341     |
| 1001 | UBQL1_HUMAN | K.TQNRPDHSAQQTNTAGSNVTTSSSTP<br>NSNSTSGSATSNPFGGLGGLAGLSSL<br>GLNTTN*FSELQSQM#QR.Q  | N167     |
| 1002 | UBQL1_HUMAN | K.TQNRPDHSAQQTNTAGSNVTTSSSTP<br>NSNSTSGSATSNPFGGLGGLAGLSSL<br>GLN*TTNFSELQSQMQR.Q   | N164     |
| 1003 | UFO_HUMAN   | R.VACTSSQGPSSWTHWLPVETPEGVPL<br>GPPEN*ISATR.N                                       | N339     |
| 1004 | VASN_HUMAN  | R.LHEITN*ETFR.G                                                                     | N117     |
| 1005 | WNT5A_HUMAN | R.FNSPTTQDLVYIDPSPDYCVRN*ESTG<br>SLGTQGR.L                                          | N312     |
| 1006 | WNT5A_HUMAN | R.WN*CSTVDNTSVFGR.V                                                                 | N114     |
| 1007 | WNT5A_HUMAN | R.N*ESTGSLGTQGR.L                                                                   | N312     |
| 1008 | WNT5A_HUMAN | R.FNSPTTQ^DLVYIDPSPDYCVRN*ESTG<br>SLGTQ^GR.L                                        | N312     |
| 1009 | XYLK_HUMAN  | R.TEIKPVATEQLLSTFLTVGNN*TCFYG<br>K.C                                                | N194     |
| 1010 | XYLK_HUMAN  | R.TEIKPVATEQLLSTFLTVGN*N*TCFY<br>GK.C                                               | N193N194 |
| 1011 | YBOX1_HUMAN | R.SVGDGETVEFDVVEGEKGAEAAAN*VT<br>GPGGVPVQGSK.Y                                      | N124     |

N\*: N-linked glycosylation site, N^/Q^: deamidation of N/Q into D/E, M#: oxidation of methionine.

**Table S3** Phosphopeptides enriched by DZMOF-FDP from HeLa cell proteins tryptic digest

| No. | Protein          | Peptide sequence                                                               |
|-----|------------------|--------------------------------------------------------------------------------|
| 1   | 4EBP1_HUMAN      | R.RVVLGDGVQLPPGDYST[pT]PGG[pT]LFSTTPG<br>GTR.I                                 |
| 2   | 4EBP1_HUMAN      | R.RVVLGDGVQLPPGDYSTTPGG[pT]LF[pS]TTPG<br>GTR.I                                 |
| 3   | 4EBP1_HUMAN      | R.RVVLGDGVQLPPGDY[pS]TTPGGTLFSTTPGG[<br>pT]R.I                                 |
| 4   | 4EBP1_HUMAN      | R.RVVLGDGVQLPPGDYSTTPGGTLFS[pT][pT]PG<br>GTR.I                                 |
| 5   | A0A024QZP7_HUMAN | K.IGEGT[pY]GVVYK.G                                                             |
| 6   | A0A024R368_HUMAN | R.GSM#E[pS]LALSNA[pT]GLSADGGAKR.Q                                              |
| 7   | A0A024R4E5_HUMAN | K.VATLN[pS]EEESDPPTYK.D                                                        |
| 8   | A0A024RA28_HUMAN | R.GFGDGYNGYGGGPGGGNFGG[pS]PGYGGGR.<br>G                                        |
| 9   | A0A024RCR6_HUMAN | R.ASPEPQRENA[pS]PAPGTTAEEAMSR.G                                                |
| 10  | A0A024RCR6_HUMAN | R.APPQTHLPSGASSGTGSASATHGGG[pS]PPGTR<br>.G                                     |
| 11  | A0A075B6F3_HUMAN | K.I[pT]EMI[pT]VVQ[pT][pY][pS]TLSN[pS][pT]IEG<br>IDIMAIKFRNIYQGVK.K             |
| 12  | A0A075B6G6_HUMAN | R.M#VDVPV[pT]STGVQTDAV[pS]GEAAEEE[pT]<br>PAVFIR.K                              |
| 13  | A0A075B730_HUMAN | R.QV[pS]ASELHTSGILGPETLR.D                                                     |
| 14  | A0A075B730_HUMAN | R.RQVSA[pS]ELHTSGILGPETLR.D                                                    |
| 15  | A0A075B730_HUMAN | R.RQV[pS]ASELHTSGILGPETLR.D                                                    |
| 16  | A0A087WSZ7_HUMAN | R.SDSYDL[pS]PK.S                                                               |
| 17  | A0A087WTA8_HUMAN | R.[pT]GHPG[pT]VGPAGIRGPQGHQGPAGPPGPP<br>GPPGPPGV[pS]GGGYDFG[pY]DGDF[pY]R.A     |
| 18  | A0A087WTD7_HUMAN | K.SGSLDSELSV[pS]PK.R                                                           |
| 19  | A0A087WTH8_HUMAN | R.YLVDGTKPNAG[pS]EEI[pS][pS]EDDELVEEK.K                                        |
| 20  | A0A087WTM1_HUMAN | R.MYLQQDELEEEEDERGP[pT]PPVR.G                                                  |
| 21  | A0A087WTP3_HUMAN | K.VQI[pS]PDSGGLPER.S                                                           |
| 22  | A0A087WTU9_HUMAN | K.VSAVAGPADQK[pT]GLP[pT]VP[pS][pS]A[pY]S<br>HR.E                               |
| 23  | A0A087WTW0_HUMAN | R.SNDGAYSLVLAGG[pY]EDDVDHGNFF[pT][pY]<br>[pT]GSGGRDLSGNK.R                     |
| 24  | A0A087WU58_HUMAN | R.AVR[pT]M#QNLFPPEE[pS]TSANLSLSTSSSLIFV<br>CM#[pY]SSP.-                        |
| 25  | A0A087WU74_HUMAN | R.LWAQDGESEPPKD[pS]DGEDPETAAVGCR.G                                             |
| 26  | A0A087WUT0_HUMAN | R.GFGDSFGRLG[pS]AMIGGFAGRIG[pS][pS]NMG<br>PVG[pS]GI[pS]GGMGSM#NSVTGGM#GM#GLDR. |

M

27 A0A087WUT6\_HUMAN K.QSFDDND[pS]EELEDKDSK.S

28 A0A087WUT6\_HUMAN K.NKPGPNIE[pS]GNEDDDASFK.I

29 A0A087WUT6\_HUMAN K.VEM[pY][pS]GSDDDDDFNKLPK.K

30 A0A087WUT6\_HUMAN K.VEM[pY]SG[pS]DDDDDFNKLPK.K

31 A0A087WUZ3\_HUMAN R.RPP[pS]PEPSTK.V

32 A0A087WUZ3\_HUMAN R.AQTLPTSVVTITSES[pS]PGKR.E

33 A0A087WV21\_HUMAN R.LGIM#[pS]SEEVAGGR.E

34 A0A087WVF1\_HUMAN K.VEELIESEAPPKASEQE[pT]AK.E

-

35 A0A087WVF6\_HUMAN .Q[pS]DHGNGLGRGTRG[pS]GC[pS]GG[pS]LVAD  
WGGGAAAAAVALALAPAL[pS][pT]MR.R

36 A0A087WW66\_HUMAN R.TVG[pT]PIASVPGSTNTGTVPGSEKSDSMETE  
EK.T

37 A0A087WW88\_HUMAN K.ATI[pS]DEEIER.Q

38 A0A087WWF4\_HUMAN K.NWEDEDFYD[pS]DDDTFLDR.T

39 A0A087WWP4\_HUMAN R.SL[pS]PGGAALGYR.D

40 A0A087WWP4\_HUMAN R.HCAP[pS]PDR[pS]PELSSSR.D

41 A0A087WWP4\_HUMAN R.DR[pT]PPLLYR.D

-

42 A0A087WWR2\_HUMAN .M#KM#P[pT]M#VPLSLLSVPQLSGAGGGGGEAG  
AGGGAAAVAAGGVVTTTA[pS]GKR.I

43 A0A087W XK5\_HUMAN R.QNS[pS]FTEKTNEIR.R

44 A0A087W XV6\_HUMAN R.QAPGVGAVGGG[pS]PEREEVGAG[pY]NSEDEY  
EAAAAR.I

45 A0A087W Y61\_HUMAN R.VSLEPHQPG[pT]PESK.K

46 A0A087W Y61\_HUMAN R.TQPDGTSVPGIPA[pS]PISQR.L

47 A0A087W Y61\_HUMAN K.APVPSTCSSTFPEEL[pS]PPSHQAK.R

48 A0A087W YK2\_HUMAN R.GRFQVI[pT]IPQQQ[pS]AKM#[pT][pS]FGIEHI[pS]  
]VFSETNHSSEEAFIK.T

49 A0A087W YK6\_HUMAN R.FIIGSVSEDN[pS]EDEISNLVK.L

50 A0A087W YT3\_HUMAN K.LNWLSVDFNNWKDWEDD[pS]DEDMSNFDR.F

51 A0A087W YT3\_HUMAN K.LNWLSVDFNNWKDWEDD[pS]DEDM#SNFDR.  
F

52 A0A087W YT3\_HUMAN K.DWEDD[pS]DEDMSNFDR.F

53 A0A087W Z62\_HUMAN K.KFGLHV[pS]R.M

-

54 A0A087W ZP5\_HUMAN .EQLVVAG[pT]IIIQNIGAM#SSYLLIIKTELPAAIA  
EFL[pT]GD[pY][pS]R.-

55 A0A087W ZR1\_HUMAN K.M#M#SAAAIANGGGVASGSLVATLQSLGA[pT]  
GL[pS]GL[pT]KFILG[pS]IGSAIAAVIAR.F



56 A0A087WZR1\_HUMAN K.M#M#[pS]AAAIANGGGVA[pS]G[pS]LVA[pT]L  
 QSLGATGLSGLTK.F

57 A0A087WZT0\_HUMAN R.AAFT[pT]PDHAPLSPQSSVASSGSEQTEEQGSS  
 R.N

58 A0A087X0K9\_HUMAN K.AIPV[pS]PSAVEEDEDEDEDGHTVVATAR.G

59 A0A087X0K9\_HUMAN K.VQIPVSRPDPEPV[pS]DNEEDS[pY]DEEIHDP  
 S

60 A0A087X1E1\_HUMAN K.GDMGDPM#[pT]GEKGGIGLPLPGANGM#K  
 GEK.G

61 A0A087X1F3\_HUMAN R.DPGK[pS]PVLVR.I

62 A0A087X1X7\_HUMAN R.LNVLEKS[pS]PGHR.A

63 A0A087X1X7\_HUMAN R.ATAPQTQHV[pS]PMR.Q

64 A0A087X1X7\_HUMAN R.ATAPQTQHV[pS]PM#R.Q

65 A0A087X1X7\_HUMAN K.KPATPAEDEDDDDIDLFG[pS]DNEEEDK.E

66 A0A087X1X7\_HUMAN K.KPATPAEDEDDDDIDLFG[pS]DNEEEDKEAAQ  
 LR.E

67 A0A087X1X7\_HUMAN K.KPA[pT]PAEDEDDDDIDLFG[pS]DNEEEDKEA  
 AQLR.E

68 A0A087X1X7\_HUMAN K.KPATPAEDEDDDDIDLFG[pS]DNEEEDKEAAQ  
 LREER.L

69 A0A087X1X7\_HUMAN K.KPA[pT]PAEDEDDDDIDLFG[pS]DNEEEDKEA  
 AQLREER.L

70 A0A087X1X7\_HUMAN R.QVEPPAKKPATPAEDEDDDDIDLFG[pS]DNEEE  
 DKEAAQLR.E

71 A0A087X1X7\_HUMAN R.QVEPPAKKPA[pT]PAEDEDDDDIDLFG[pS]DNE  
 EEDKEAAQLR.E

72 A0A087X2D4\_HUMAN R.VL[pT]Q[pT]SSGGFCGNDGFM#HM#TLA[pS]LP  
 FGGVGA[pS]GM#GRYHGK.F

73 A0A088AWL3\_HUMAN R.SM#[pT]NEAAAA[pS]AAAAAA[pT]EPPPPPLPP  
 PPEPISTEPVETSR.W

74 A0A090HNM7\_HUMAN R.NAPAAVDEGSI[pS]PR.T

75 A0A096LNZ0\_HUMAN K.LGGAVPFAPPEV[pS]PEQAK.T

76 A0A0A0MQR4\_HUMAN R.FAELPEFRPEEVLP[pS]PTLQSLAT[pS]PR.A

77 A0A0A0MQS2\_HUMAN K.ITFITSFGG[pS]DEEAAAAAAAAAAAAASGVTTGKP  
 PAPPQPGGPAPGR.N

78 A0A0A0MR02\_HUMAN K.LTFDFFF[pS]PNTGKK.S

79 A0A0A0MR74\_HUMAN R.VPGERP[pS]ANVPPLGVHGHGDP[pS]DP[pT]GL  
 VR.G

80 A0A0A0MRA3\_HUMAN K.DHM#TVSWKPPADDGGSPI[pT]G[pY]LLEKRE  
 TQAVNWT.V

81 A0A0A0MRA3\_HUMAN R.VM#AENEYGIGEPTETTEPVKASEAPSPD[pS]

LNIMDI[pT]K.S  
 82 A0A0A0MRA3\_HUMAN K.YTLTIQNVL[pS]AA[pS]LTLVVKVLDTPGPPTN  
 ITVQDVTK.E  
 83 A0A0A0MRA8\_HUMAN R.DDIV[pS]GRLPCSFVTLALLGS[pY][pT]VQ[pS]E  
 LGDYDPDECG[pS]DYI[pS]EFRFAPNH[pT]K.E  
 84 A0A0A0MRI1\_HUMAN K.QDD[pS]PPRPIIGPALPPGFIK.S  
 85 A0A0A0MRJ7\_HUMAN K.Q[pS]N[pS][pS]KILVGR.W  
 86 A0A0A0MRJ7\_HUMAN K.ADKPL[pS]IHPQGIRYSKL[pS]EGASYLDHTFP  
 AEK.M  
 87 A0A0A0MRL6\_HUMAN R.TL[pS]PTPSAEGYQDVR.D  
 88 A0A0A0MRN5\_HUMAN R.KVEEEG[pS]PGDPDHEASTQGR.T  
 89 A0A0A0MRS7\_HUMAN K.FPSLPRSPASSANSNGNFNHSPHSSGGS[pS]GVG  
 V[pS]R.H  
 90 A0A0A0MRT2\_HUMAN K.QGPVSQSATQQPVTADKQQGHEPV[pS]PR.S  
 91 A0A0A0MRT8\_HUMAN R.IAA[pS]ALSDIAK.H  
 92 A0A0A0MRX8\_HUMAN K.TISIDENMEPSP[pT]GDFYP[pS]PSSPAAGSR.T  
 93 A0A0A0MSC1\_HUMAN K.GIE[pT]YLIIA[pS]KPEVKK[pT]ATQNGLNG[pS]  
 ALPNGAPA[pS][pS]K.S  
 94 A0A0A0MSK5\_HUMAN R.LQQQHSEQPPLQP[pS]PVMTR.R  
 95 A0A0A0MSK5\_HUMAN K.VNFSEEGE[pT]EEDDQDSSHSSVTTVK.A  
 96 A0A0A0MSK5\_HUMAN K.SELGNQSPSTS[pS]R.Q  
 97 A0A0A0MSN9\_HUMAN R.SGAHSSA[pS]PPR.S  
 98 A0A0A0MSN9\_HUMAN R.SI[pS]ADDDLQESSR.R  
 99 A0A0A0MSW3\_HUMAN R.ITPPAAKPG[pS]PQAK.S  
 100 A0A0A0MSZ1\_HUMAN R.KKSS[pT]VPSSNTASGGM#TR.R  
 101 A0A0A0MT60\_HUMAN R.RPSQEQSA[pS]ASSGQPQAPLNR.E  
 102 A0A0A0MT60\_HUMAN R.RPSQEQ[pS]ASASSGQPQAPLNR.E  
 103 A0A0A0MTC1\_HUMAN R.EAAEPLSEPKEDQEAELL[pS]EPEEESER.H  
 104 A0A0A0MTC1\_HUMAN R.MIRLLSLVDSAGQRDETGNNSVQTVFQGTLAA  
 [pT]K.R  
 105 A0A0A0MTE2\_HUMAN K.ATLSSTGLDLMSESGEGEI[pS]PQREVS.R  
 106 A0A0A0MTE2\_HUMAN K.EVAATEEDVTRLP[pS]PTSPFSSLSQDQAATSK.  
 A  
 107 A0A0A0MTE2\_HUMAN K.EVAATEEDVTRLPSP[pT]SPFSSLSQDQAATSK.  
 A  
 108 A0A0A0MTE2\_HUMAN K.EVAATEEDVTRLP[pS]P[pT]SPFSSLSQDQAAT  
 SK.A  
 109 A0A0A0MTE2\_HUMAN R.VTTEIQLPSQ[pS]PVEEQSPASLSSLR.S  
 110 A0A0A0MTE2\_HUMAN R.SH[pS]PSASQSGSQLR.N  
 111 A0A0A0MTE2\_HUMAN K.EVAATEEDVTRLPSP[pT][pS]PFSSLSQDQAAT  
 SK.A

112 A0A0A0MTP7\_HUMAN K.TEELIE[pS]PKLESSEGEIITVDR.Q  
113 A0A0A0MTP7\_HUMAN R.AETASQSQR[pS]PISDNSGCDAPGNSNPSLSVP  
SSAESEK.Q  
114 A0A0A0MTP7\_HUMAN R.AETASQSQRSPISDN[pS]GCDAPGNSNPSLSVP  
SSAESEK.Q  
115 A0A0A6YYC7\_HUMAN R.RS[pS]PSARPPDVPGQQPQAAK.S  
116 A0A0A6YYG7\_HUMAN K.E[pS]RSPQQSAALPR.R  
117 A0A0A6YYG7\_HUMAN R.MN[pT]CVPHPRGAFM#LEPEGM#[pS]PMEPAG  
VSPMPGTQKDTGR.T  
118 A0A0A6YYI3\_HUMAN R.VGG[pS]DEEASGIPSR.T  
119 A0A0B4J1R3\_HUMAN R.RR[pT]AG[pS]PGAELLQAASGER.H  
120 A0A0B4J203\_HUMAN R.MGLEVIPV[pT]STTNKITAEDCTMEV[pT]PGAE  
IQDGR.F  
121 A0A0B4J210\_HUMAN R.SLPTTVPE[pS]PNYR.N  
122 A0A0B4J210\_HUMAN R.AV[pT]PVPTKTEEVSNLK.T  
123 A0A0B4J210\_HUMAN K.GLSA[pS]LPDLSENWIEVK.K  
124 A0A0B4J210\_HUMAN K.NTFTAWSDEE[pS]DYEIDDRDVNK.I  
125 A0A0B4J210\_HUMAN R.KNTFTAW[pS]DEESDYEIDDRDVNK.I  
126 A0A0B4J210\_HUMAN K.LFGAPEPSTIAR[pS]LPTTVPE[pS]PNYR.N  
R.ESPRLQLPGAEGPAI[pS]DGEEGGGEPGAGGG  
AAGAAGARR.D  
127 A0A0B4J210\_HUMAN K.LFGAPEPS[pT]IARSLPTTVPE[pS]PNYR.N  
R.ESPRLQLPGAEGPAI[pS]DGEEGGGEPGAGGG  
AAGAAGARR.R  
128 A0A0B4J210\_HUMAN K.NTFTAW[pS]DEE[pS]DYEIDDRDVNK.I  
129 A0A0B4J210\_HUMAN K.IDLQGPEVG[pY]FSQMKIISNVVP[pS][pY]K.T  
130 A0A0C4DFR4\_HUMAN R.EASRPPEEPSAP[pS]PTLPAQFK.Q  
131 A0A0C4DFX9\_HUMAN R.IPNYQL[pS]PTKLPSINK.S  
132 A0A0C4DG07\_HUMAN R.[pS]AGEEEDGPVLTDEQK.S  
133 A0A0C4DG62\_HUMAN K.LKLT[pY]EEK.C  
134 A0A0C4DG71\_HUMAN K.AALGLQD[pS]DDEDAAVDIDEQIESMFNSK.K  
135 A0A0C4DG89\_HUMAN K.AALGLQD[pS]DDEDAAVDIDEQIESM#FNSK.K  
136 A0A0C4DG89\_HUMAN K.AASLGSSQS[pS]RTYAGGTASATK.V  
137 A0A0C4DGB5\_HUMAN K.KEGITGPPADSSKPIGPDDAIDALSSDFTCG[pS]  
PTAAGK.K  
138 A0A0C4DGB5\_HUMAN -.M#[pS]ATVVDAVNAAPLSGSKEM#SLEEPK.K  
139 A0A0C4DGD2\_HUMAN R.DGTAPPPQSPGSPGTGQDEEW[pS]DEESPRK.A  
140 A0A0C4DGG1\_HUMAN R.DGTAPPPQSPGSPGTGQDEEW[pS]DEESPR.K  
141 A0A0C4DGG1\_HUMAN R.SQSDLDDQH DYDSVA[pS]DEDTDQEPLR.S  
142 A0A0C4DGN6\_HUMAN R.SQSDLDDQH[pY]DSVA[pS]DEDTDQEPLR.S  
143 A0A0C4DGN6\_HUMAN R.SQSDLDDQH DYD[pS]VA[pS]DEDTDQEPLR.S  
144 A0A0C4DGN6\_HUMAN R.SQSDLDDQH DYD[pS]VA[pS]DEDTDQEPLR.S  
145 A0A0C4DGN6\_HUMAN R.SQSDLDDQH DYD[pS]VA[pS]DEDTDQEPLR.S

146 A0A0C4DGP3\_HUMAN -.MPVL[pS]EDSGLHETLALLT[pS]QLRPDSNHK.E  
-

147 A0A0C4DGQ5\_HUMAN .MFLVN[pS]FLKGGGGGGGGGGGLGGGLGNVLG  
GLISGAGGGGGGGGGGGGGGGGGGGGGG[pT]AMR  
.I

148 A0A0C4DGQ5\_HUMAN K.GGGGGGGGGGGGLGGGLGNVLGGLISGAGGG  
GGGGGGGGGGGGGGGGGGGGG[pT]AMR.I

149 A0A0C4DGQ6\_HUMAN R.TYEQIKVDENENCSSLG[pS]PSEPPQTLDLVR.A

150 A0A0C4DGX4\_HUMAN K.MYVQ[pT]VLDVHKKYNALVM#SAFNNDAGF  
VAALDK.A

151 A0A0C4DGY1\_HUMAN K.CM#ISGWGNTQEGNA[pT]KPELLQKA[pS]VGII  
DQK.T  
-

152 A0A0D9SEU5\_HUMAN .M#AAATADPGAGNPQPGDSSGGGAGGGGLP[pS]  
PGEQELSRRLQR.L

153 A0A0D9SEV0\_HUMAN R.TPESQPD[pT]PPGTPLVSQDEKR.D

154 A0A0D9SF58\_HUMAN R.VENSPQVDG[pS]PPGLEGLLGIGEK.G

155 A0A0D9SG79\_HUMAN K.VNSKSGPEGD[pS]K.M

156 A0A0G2JHC2\_HUMAN R.EAQGNSSAGVEAAEQRPVEDGERGM#KPTEG  
WKW[pT]LNSR.K

157 A0A0G2JJ82\_HUMAN R.KAGHCPNPGI[pS]LGAVR.T

158 A0A0G2JJB9\_HUMAN K.LSVPT[pS]DEEDEVPAKPR.G

159 A0A0G2JM93\_HUMAN K.TIVQ[pT]LGPIVQYPGSNAGPPSAPRGPPM#API  
II[pS]QR.T

160 A0A0G2JMS7\_HUMAN R.MVEPENAVTITPLRPEDDY[pS]PR.E

161 A0A0G2JMS7\_HUMAN K.M#AESPCSPSGQQPP[pS]PP[pS]PDEL PANVK.Q

162 A0A0G2JMS7\_HUMAN R.AFAAVPTSHPPEDAPAQPPTPGPAA[pS]PEQLS  
FR.E

163 A0A0G2JMS7\_HUMAN R.LAEAPSPAPTPSPTPVEDLGPQTSTSPGRL[pS]P  
DFAEELR.S

164 A0A0G2JMS7\_HUMAN R.LAEAPSPAPTPSPTPVEDLGPQTST[pS]PGRL[pS]  
]PDFAEELR.S

165 A0A0G2JMS7\_HUMAN R.LALDGETLGEEEQEDEQPPWASPSP[pT]SR.Q

166 A0A0G2JMS7\_HUMAN R.AFAAVPTSHPPEDAPAQPPTPGPAASPEQL[pS]  
FR.E

167 A0A0G2JMS7\_HUMAN R.AFAAVPTSHPPEDAPAQPP[pT]PGPAASPEQLS  
FR.E

168 A0A0G2JMS7\_HUMAN R.RSEACPCQPSG[pS]PLPAEEEEK.R

169 A0A0G2JMS7\_HUMAN R.M#VEPENAVTITPLRPEDDY[pS]PR.E

170 A0A0G2JMS7\_HUMAN K.MAESPCSPSGQQPP[pS]PP[pS]PDEL PANVK.Q

171 A0A0G2JNB1\_HUMAN R.ALTSSALHGGEMGG[pS]E[pS]GDLKGGM#TNC

172 A0A0G2JNH7\_HUMAN TLPHR.S  
 R.SFASFPETQA[pS]GAGGA[pS]LVAAVG[pT]CV  
 AHAEPEEDGVGGQAGG[pS]PPRLHCNGEGK.W  
 173 A0A0G2JQF2\_HUMAN K.[pS]LRAFVGEVGARSAAPGGGSVAAAAAAMG  
 AALGSMVGLM#TYGR.R  
 174 A0A0J9YVR0\_HUMAN R.SS[pS]PVQVEEEPVR.L  
 175 A0A0J9YWD5\_HUMAN R.TVTCVTVVEPEAPP[pS]PDVLQAATHR.V  
 176 A0A0J9YWU8\_HUMAN R.TGKPMPAVSNGGLWM#ESLRTTGLEA[pS]GG  
 VPGK.K  
 177 A0A0J9YWY6\_HUMAN K.NPCAM#FAAGEIKTPTGEGLLD[pS]PSKTM#[pS]  
 JIK.E  
 178 A0A0J9YXN7\_HUMAN K.SMVM#GTKDTM#STGLTGAANVAKGAMQTG  
 LN[pT][pT]QNIATGTK.D  
 179 A0A0R4J2E8\_HUMAN R.D[pS]QGHGRDL[pS]AAGIGLLAAATQ[pS]L[pS]  
 M#PASLGR.M  
 180 A0A0R4J2E8\_HUMAN R.SY[pS]PDGKESPSDKK.S  
 181 A0A0R4J2E8\_HUMAN R.[pS]YSPDGKESPSDKK.S  
 182 A0A0U1RQI6\_HUMAN R.SR[pS]DIDVNAAAGAK.A  
 183 A0A0U1RQJ5\_HUMAN R.SLSN[pS]NPDISGTPTSPDDEV.R.S  
 184 A0A0U1RQJ8\_HUMAN K.LAAPSVSHV[pS]PR.K  
 185 A0A0U1RQS4\_HUMAN R.RSTVFL[pS]VGAIEGSAPGADLP[pS]LQPSR.S  
 186 A0A0U1RR34\_HUMAN R.GRL[pT]P[pS]PDIIVL[pS]DNEAS[pS]PR.S  
 187 A0A0U1RRK2\_HUMAN K.EGMNPSYDEYAD[pS]DEDQHDAYLER.M  
 188 A0A0U1RRK2\_HUMAN K.EGM#NPSYDEYAD[pS]DEDQHDAYLER.M  
 189 A0A140T947\_HUMAN R.LLED[pS]EES[pS]EETVSR.A  
 190 A0A140T963\_HUMAN R.KAV[pS]KLYA[pS]K.A  
 -  
 191 A0A140T9B9\_HUMAN .ILREAQLY[pS]VDV[pT]LDPDTAYPSLILSDNLR  
 QVR.Y  
 192 A0A140T9M2\_HUMAN K.CLQ[pT][pT]EEPPSRTAGAM#M#QFTAPIPGAT  
 GPFKLSQK.T  
 193 A0A140TA73\_HUMAN R.GPAGEAGA[pS]PPVRR.V  
 194 A0A140TA73\_HUMAN R.GLGPP[pS]PPAPPRGPAGEAGA[pS]PPVRR.V  
 -  
 195 A0A1B0GTN9\_HUMAN .APNPHM#[pS]KQDRNQR[pS]SMVSETSTAGTA  
 STLEAKPGPK.I  
 196 A0A1B0GTU4\_HUMAN K.TGSS[pS]PPGGPPKPGSQLDSMLGSLQSDLNK.  
 L  
 197 A0A1B0GTU4\_HUMAN K.TG[pS]SSPPGGPPKPGSQLDSM#LGSQSDLNK.  
 L  
 198 A0A1B0GTU4\_HUMAN R.FIHQQPQSS[pS]PVYGSSAK.T

199 A0A1B0GU03\_HUMAN R.[pT]M#[pS]EVGGSVEDLIAKGPVSK[pY]SQA  
AV[pT]EGPIPEVLK.N  
200 A0A1B0GU09\_HUMAN K.RPQLYGM#GSNPH[pS]QPQQSSPYPGG[pS]Y  
PPGPQR.Y  
201 A0A1B0GU63\_HUMAN R.QV[pT][pT]V[pS]EDLSYLTQTSTTVNSFQM#TS[  
pT]PPAWG[pS]RFPV[pS]PPQGRAM#R.L  
202 A0A1B0GU83\_HUMAN R.SRGGPDQAWAVM#TSSGVCSSWP[pS]PPQLSSF  
SGSCAPRAPPGLGCLLLA.-  
203 A0A1B0GUA3\_HUMAN K.INNLNK[pS]ALK.Y  
204 A0A1B0GV32\_HUMAN R.ESP[pS]VKR.M  
205 A0A1B0GV32\_HUMAN R.N[pS]M#SPGVTHRPPSAGGLM#GGDLTSGAGT  
SANGYGNPR.N  
206 A0A1B0GV47\_HUMAN R.KLS[pS]SDAPAQDTGSSAAAVETDASR.T  
207 A0A1B0GV47\_HUMAN K.ELSPPLPSKIGSI[pS]RQ[pS][pS]LSEK.K  
208 A0A1B0GV68\_HUMAN K.VSAGEPGSHP[pS]PAPR.R  
209 A0A1B0GVN4\_HUMAN K.TISIDENMEPSPTGDFYP[pS]PSSPAAGSR.T  
210 A0A1B0GVN4\_HUMAN M.Q[pY][pS]AM#DEFHPFIEALLPHVRAIA[pY]TW  
FNLQARK.R  
211 A0A1B0GVY1\_HUMAN R.SL[pS]SPTVTLSAPLEGAK.D  
212 A0A1B0GVZ8\_HUMAN -.ICVKTELLGEETPMAADEG[pS]AEK.Q  
213 A0A1B0GW05\_HUMAN R.ASQSPLRGA[pS]DVGAGEPGER.A  
214 A0A1B0GWA2\_HUMAN K.SCQGPRM#STGPDIIHFIMGSEG[pT]LGVITEA  
TIK.I  
215 A0A1C7CYX9\_HUMAN K.NLGSG[pS]PKPR.Q  
216 A0A1C7CYX9\_HUMAN K.TVTPAS[pS]AKTSPAKQAPPVR.N  
-  
217 A0A1W2PNY7\_HUMAN .ASSNIHANHL[pS]LDA[pS]SSSSSSSSSSSSSSSSSS  
SSSVHEPK.M  
218 A0A1W2PPB7\_HUMAN K.HLLAM#GADVQEGANSM[pT]ALIVAVKGG[p  
Y]TQSVK.E  
219 A0A1W2PPS1\_HUMAN R.AKSPQPVEEEDHFD[pT]VVCLDTYNCDLH  
FK.I  
220 A0A1W2PPS1\_HUMAN R.AK[pS]PQPVEEEDHFD[pT]VVCLDTYNCDLH  
FK.I  
221 A0A1W2PPX9\_HUMAN R.AH[pT]PLNTPDPSTK.L  
222 A0A1W2PPZ5\_HUMAN K.KKEPAITSQN[pS]PEAR.E  
223 A0A1W2PQ43\_HUMAN R.IDI[pS]PSTLR.K  
224 A0A1W2PQ43\_HUMAN R.RIDI[pS]PSTLR.K  
225 A0A1W2PQ43\_HUMAN K.DLFDY[pS]PPLHK.N  
226 A0A1W2PQ43\_HUMAN K.LKDLDY[pS]PPLHK.N  
227 A0A1W2PQ43\_HUMAN K.LKDLDY[pY]SPPLHK.N

228 A0A1W2PQ43\_HUMAN K.KAEGEPQEE[pS]PLKSK.S  
 229 A0A1W2PQ43\_HUMAN K.FND[pS]EGDDTEETEDYR.Q  
 230 A0A1W2PQ43\_HUMAN K.QKFND[pS]EGDDTEETEDYR.Q  
 231 A0A1W2PQ43\_HUMAN R.AEGEWEDQEALDYF[pS]DKESGK.Q  
 232 A0A1W2PQ43\_HUMAN K.GRAEGEWEDQEALDYFSDKE[pS]GK.Q  
 233 A0A1W2PQ43\_HUMAN K.KAEGEPQEE[SPLK][pS]K.S  
 234 A0A1W2PQA1\_HUMAN K.EPVEKG[pS]AQM#DPPQM#GPAPTEAVQK.G  
 -  
 235 A0A1W2PRT1\_HUMAN .NSTNLSPTQFPADADAVATEPA[pT]AVLA[pS]Q  
 PQ[pS]KEHFR[pS]LEER.K  
 236 A0A1W2PRV5\_HUMAN R.RGTGQ[pS]DD[pS]DIWDDTALIK.A  
 237 A0A1W2PRV5\_HUMAN R.GTGQ[pS]DD[pS]DIWDDTALIK.A  
 238 A0A1W2PRV5\_HUMAN R.RGTGQ[pS]DDSDIWDDTALIK.A  
 239 A0A1W2PS38\_HUMAN R.GLTLIPAAPSGSSSASPITS[pS]RP[pS]SWRR.-  
 240 A0A1W2PS85\_HUMAN K.LKTEKEPDATPP[pS]PR.T  
 241 A0A286YEX4\_HUMAN R.NWTEDEMEGGIS[pS]PVKK.T  
 242 A0A286YEX5\_HUMAN K.[pS]QRYSGAYGASVSDEELK.R  
 243 A0A2C9F2M6\_HUMAN K.L[pS]CDDI[pT]FNQL[pY]QFVAGWTLLG[pS]DL  
 ILIVIS[pY][pS]FILKVVL.R.I  
 244 A0A2R8Y443\_HUMAN R.IYQ[pY]IQSR.F  
 245 A0A2R8Y4F5\_HUMAN K.LEKSTKPIVAAINGSCLGGGLEVGVPAAALDM#  
 ML[pT]GR.S  
 246 A0A2R8Y4N5\_HUMAN K.QQLEEEENFSRPQIDENPLDDN[pS]JEEEMEDA  
 PK.Q  
 247 A0A2R8Y4Z1\_HUMAN R.[pS]VTLTNTSMSTTSGEAGSPAAAM#HQETEG  
 A[pS]LHVNV[pT]DDMGLV[pS]R.S  
 R.F[pT]VE[pS]P[pS][pT]VTSGGGHHDPAAGLQPL  
 248 A0A2R8Y575\_HUMAN HVP[pS][pS]PEAAGQEEEGGGEGQ[pT]PRPLED[  
 pT][pT]R.E  
 K.DSFIENSSNCTSGS[pS]KPN[pS]P[pS]ISPSILSN  
 249 A0A2R8Y5A6\_HUMAN TEHK.R  
 R.WET[pT]MGEA[pS]A[pS]IPTTVGSLPSSKSFLG  
 250 A0A2R8Y5N2\_HUMAN M#K.A  
 K.VEDP[pT]FLNQLQSGVNR.W  
 251 A0A2R8Y5T0\_HUMAN R.LVGS[pS]LR.A  
 252 A0A2R8Y5V0\_HUMAN -.MFSN[pS]DEAVINK.K  
 253 A0A2R8Y677\_HUMAN -.IDG[pS]PALK.Q  
 254 A0A2R8Y717\_HUMAN R.SVSEIN[pS]DDELSGK.G  
 255 A0A2R8Y7M0\_HUMAN K.QTDPS[pT]PQQESSKPLGGIQPSSQTIQPK.V  
 256 A0A2R8Y7W5\_HUMAN K.GGGGAGGTGVFKSGWLYKGNFNS[pT]VNNTV  
 257 A0A2R8YD85\_HUMAN TVR.S

258 A0A2R8YD85\_HUMAN K.HAN[pS]VD[pT]SFSKDVLSIAAFSSIAISTVNH  
 ADSRASLA[pS]LD[pS]NP[pS][pT]NEK.S  
 259 A0A2R8YDE6\_HUMAN R.[pY]DHG[pT]FFPMGDEGA[pS]SQIGRAAGTGF[  
 pT]VNVAVNGPRMGDAD[pY]LAAWHR.L  
 260 A0A2R8YFN5\_HUMAN R.TQSS[pS]CEDLPSTTQPK.G  
 261 A0A2U3TZI4\_HUMAN K.EAMA[pS][pS]KSPEKSPENLVCSQNSEAGYINV  
 ASLK.E  
 262 A0A3B3IRT3\_HUMAN R.TS[pS][pT]CSNESLSVGGTSVTPR.R  
 263 A0A3B3IRT8\_HUMAN K.VEMGTSSQNDVDMSWIPQETLNQINKA[pS]PR  
 .R  
 264 A0A3B3IRT8\_HUMAN K.VEM#GTSSQNDVDMSWIPQETLNQINKA[pS]P  
 R.R  
 265 A0A3B3IRW6\_HUMAN K.GQDTVAIEGF[pT]DEEDTE[pS]GGEGQYR.E  
 266 A0A3B3IS06\_HUMAN R.KL[pS]GDQPAAR.T  
 267 A0A3B3IS06\_HUMAN R.AASAPAKE[pS]PR.K  
 268 A0A3B3IS06\_HUMAN R.AALAPAKE[pS]PR.K  
 269 A0A3B3IS06\_HUMAN K.TVANLLSGK[pS]PR.K  
 270 A0A3B3IS06\_HUMAN K.TSQVGAASAPAKE[pS]PR.K  
 271 A0A3B3IS06\_HUMAN K.LGAGEGGEASV[pS]PEKTSTTSK.G  
 272 A0A3B3IS06\_HUMAN K.SLGNILQAKPTS[pS]PAKGPPQK.A  
 273 A0A3B3IS06\_HUMAN K.KLGAGEGGEA[pS]VSPEKTSTTSK.G  
 274 A0A3B3IS06\_HUMAN K.KQEGPATQVDSAVGTLPAT[pS]PQSTSVQAK.  
 G  
 275 A0A3B3IS06\_HUMAN K.KQEGPATQVDSAVGTLPATSPQ[pS]TSVQAK.  
 G  
 276 A0A3B3IS06\_HUMAN R.TETLVEETAAESSEDDVVAPSQSLLSGYM#[pT]  
 PGLTPANSQASK.A  
 277 A0A3B3ISD8\_HUMAN R.GVCFRGE[pS]CM#YLHGDIKDM#CGLQTLHPM  
 #DAAQREEHM#R.A  
 278 A0A3B3ISP1\_HUMAN K.RLSSGFGGGGGGGSGGGGGSGGGGGGLGSS  
 SHPL[pS][pS]LL[pS]M#WR.G  
 -  
 279 A0A3B3ISV3\_HUMAN .QKGDPGFQGMPGIGG[pS]PGITG[pS]KGDM#GPP  
 GVPGFQGPK.G  
 280 A0A3B3ISX8\_HUMAN R.IA[pS]DEEIQGTK.D  
 281 A0A3B3ITD8\_HUMAN K.YGLQD[pS]DEEEEHPSK.T  
 282 A0A3B3ITD8\_HUMAN K.GPQNQVGAG[pT][pT]TGLFGSSPA[pT][pS][pS]  
 A[pT]GLF[pS][pS][pS][pT][pT]N[pS]GFAYGQNK.T  
 -  
 283 A0A3B3ITS2\_HUMAN .M#M#CEVM#PTI[pS]EAEGPPGGGGGHGSGSPSQ  
 PDADSHFEQLM#VSMLEERDR.L



-

284 A0A3B3ITT1\_HUMAN .M#LLPLLRSSCFP[pS]SSPGGGGGSGGGGGGGDP  
GAESRPAAQLQR.G

285 A0A3B3ITW1\_HUMAN R.GEPNVS[pY]ICSR.Y

286 A0A3B3ITZ9\_HUMAN R.ER[pS]PALK.S

287 A0A3B3ITZ9\_HUMAN R.ASAVSEL[pS]PR.E

288 A0A3B3ITZ9\_HUMAN R.IDI[pS]PSTFR.K

289 A0A3B3ITZ9\_HUMAN R.RIDI[pS]PSTFR.K

290 A0A3B3ITZ9\_HUMAN R.ER[pS]PALKSPLQSVVVR.R  
K.ELEIMILNDSASAAS[pS]M#EV[pT]DRIA[pS]LE  
QRVQM#QEDDIQLLK.S

291 A0A3B3IU69\_HUMAN

292 A0A3B3IUA7\_HUMAN R.ASAP[pS]PNAQVACDHCLK.E

293 A0A494BZU5\_HUMAN M.MVVLLGA[pT]TLVLVAVAPWVLSAAAGGKN  
LK.S

-

294 A0A494C084\_HUMAN .MMLKDMED[pT]DDDDDDDDDDDDDDDEDNSLF  
PTREPR.S

295 A0A494C0H2\_HUMAN R.HPGLGELGQGPDSYGSPSFRS[pT]PEAPYA[pS]  
L[pT]EIE.-

296 A0A494C0K5\_HUMAN R.NLSPSQEEAGLEDGVSGEISD[pT]ELEQTDSCA  
EPLSEGR.K

297 A0A494C0K5\_HUMAN R.NLSP[pS]QEEAGLEDGV[pS]GEISDTELEQTDS  
CAEPLSEGR.K

298 A0A494C0K5\_HUMAN R.NLSPSQEEAGLEDGVSGEI[pS]DTELEQTDSCA  
EPLSEGR.K

299 A0A494C0Z5\_HUMAN R.KSM#VQHYRNVHAVVFV[pY]DM#TNM#ASF  
H[pS]LPSWIEECK.Q

300 A0A494C108\_HUMAN R.AFVED[pS]EDEDGAGEGGSSLLQK.R

301 A0A494C1A5\_HUMAN R.EEA[pS]DDDMEGDEAVVR.C

302 A0A494C1K3\_HUMAN K.ESTSSK[pS]PPR.K

303 A0A494C1K3\_HUMAN K.EST[pS]SKSPPR.K

304 A0A494C1K3\_HUMAN R.SPGSN[pS]KVPEIEVTVEGPNNNNPQTS AVR.T

305 A0A499FHX9\_HUMAN K.DGDSYDP[pY]DFSDTEEEMPQVH[pT]PK.T

306 A0A499FHX9\_HUMAN K.DGDSYDP[pY]DFSDTEEEM#PQVH[pT]PK.T

307 A0A499FHX9\_HUMAN K.DGDSYDP[pY]DFSD[pT]EEEM#PQVHTPK.T

308 A0A4W8VX11\_HUMAN K.NVR[pS]DI[pS]DQEEDEE[pS]EGCPVSINLSK.A  
R.MPGPMAEK[pT]G[pS]GGV[pS]GLLGGRQ[pT][p  
T]GV[pS]MAVGLLG[pS]VGEG[pT]IFEHVSGLSGR  
.R

309 A0A590UJ96\_HUMAN

310 A0A590UJS4\_HUMAN K.AITSLGGG[pS]PK.N

311 A0A590UJS4\_HUMAN K.GVNSGRLVACI[pT]TLFLFSK.I

312 A0A590UJS4\_HUMAN R.[pS]SDMDQQEDMISGVENSNV[pS]ENDIPFNV  
Q[pY]PGQ[pT][pS]K.T  
313 A0A590UJT3\_HUMAN K.YLLGDAPV[pS]PSSQK.L  
314 A0A590UJV0\_HUMAN R.[pY]M#IDIFVHGDLKPGQ[pS]PAIPPLPTEQA[p  
S]RPTPA[pS]PALEEKEGEK.K  
315 A0A5F9ZHN2\_HUMAN K.SPGVEKPIVKPTAGAGPQE[pT]NM#KEPLA[pT]  
LVDO[pS]PE[pS]LK.R  
316 A0A5H1ZRP4\_HUMAN R.KP[pS]PAQAAETPALELPLPSVPAPAPL.-  
317 A0A5H1ZRP4\_HUMAN R.A[pS]GV[pS]AAAPGERAGDGAP[pS]RAVAGAS  
AMFAGLQDLGVANGEDLK.E  
318 A0A669KB10\_HUMAN R.ADAPDAGAQS[pS]JELPSYHQNDVSLDR.G  
319 A0A669KB10\_HUMAN R.ADAPDAGAQ[pS]DSELPSYHQNDVSLDR.G  
320 A0A6I8PIV6\_HUMAN K.HMN[pS][pS]EQAHPATM#LLDTLEEGAFVL  
ADNLLEP[pT]R.V  
321 A0A6Q8PFE5\_HUMAN K.EGITGPPADSSKPIGPDDAIDALSSDFTCG[pS]P  
TAAGK.K  
322 A0A6Q8PFJ0\_HUMAN R.LSPSP[pT]SQR.S  
323 A0A6Q8PFJ0\_HUMAN R.LRLSP[pS]PTSQR.S  
324 A0A6Q8PFJ0\_HUMAN R.LRL[pS]P[pS]PTSQR.S  
325 A0A6Q8PFJ0\_HUMAN R.SGAQASS[pT]PLSPTR.I  
326 A0A6Q8PFJ0\_HUMAN R.SGAQASSTPL[pS]PTR.I  
327 A0A6Q8PFJ0\_HUMAN R.SGAQASS[pT]PL[pS]PTR.I  
328 A0A6Q8PFJ0\_HUMAN R.AS[pS]HSSQTQGGGSVTK.K  
329 A0A6Q8PFJ0\_HUMAN R.ASSH[pS]SQTQGGGSVTK.K  
330 A0A6Q8PFJ0\_HUMAN R.SVGGSGGG[pS]FGDNLVTR.S  
331 A0A6Q8PFJ0\_HUMAN R.AS[pS]H[pS]SQTQGGGSVTK.K  
332 A0A6Q8PFJ0\_HUMAN R.LSP[pS]PTSQR.S  
333 A0A6Q8PFJ0\_HUMAN R.ASSHSSQTQGGG[pS]VTK.K  
334 A0A6Q8PFJ0\_HUMAN R.ASSHSSQ[pT]QGGGSVTK.K  
335 A0A6Q8PFJ0\_HUMAN R.A[pS]SHSSQTQGGGSVTK.K  
336 A0A6Q8PGF4\_HUMAN K.TIET[pS]PSLSR.M  
337 A0A6Q8PGK1\_HUMAN R.QL[pS]SGVSEIR.H  
338 A0A6Q8PGN3\_HUMAN K.AEDEEELLRV[pS]GGVDM#[pS][pS]HQEV[pS]C  
SPVSAQLLSVLQGLLHLEPTLRS[pS]QLLWEALE[  
pS]LVNR.A  
339 A0A6Q8PHH2\_HUMAN R.LSQSSQDS[pS]PVRNLQSFSGTEEPAYSTR.R  
340 A0A6Q8PHH2\_HUMAN R.LSQSSQD[pS]SPVRNLQSFSGTEEPAYSTR.R  
341 A0A7I2V258\_HUMAN R.STAQQELDGKPA[pS]PTPVIVASHTANKEEK.S  
342 A0A7I2V2H8\_HUMAN K.A[pS]VGAM#GGGVGA[pS][pS][pS]GGGPGGSG  
GGGSGGPGAGT[pS]FPPPGVKLGRE[pY].-  
343 A0A7I2V2H8\_HUMAN K.ASVGAM#GGGVGA[pS][pS][pS]GGGPGG[pS]G

344 A0A7I2V2K5\_HUMAN GGG[pS]GGPGAGTSFPPPVGKLGRE[pY].-  
 K.VQGEAVSNIQENTQTPTVQEE[pS]EEEEVDETG  
 VEVK.D  
 345 A0A7I2V2K5\_HUMAN K.VQGEAVSNIQENTQ[pT]PTVQEE[pS]EEEEVDE  
 TGVEVK.D  
 346 A0A7I2V2K5\_HUMAN K.FKVQGEAVSNIQENTQTP[pT]VQEESEEEEEVDE  
 TGVEVK.D  
 347 A0A7I2V2K5\_HUMAN K.FKVQGEAVSNIQENTQTPTVQEE[pS]EEEEVDE  
 TGVEVK.D  
 348 A0A7I2V2L6\_HUMAN K.SE[pS]PKEPEQLR.K  
 349 A0A7I2V2R3\_HUMAN R.SSG[pS]PYGGGYGSGGGSGGYGSR.R  
 350 A0A7I2V2U7\_HUMAN K.VVVSP[pT]K.K  
 351 A0A7I2V2U7\_HUMAN K.KVVVSP[pT]K.K  
 352 A0A7I2V2U7\_HUMAN R.LELQGPRG[pS]PNAR.S  
 353 A0A7I2V2X6\_HUMAN R.TVIIEQSWG[pS]PK.V  
 -  
 354 A0A7I2V306\_HUMAN .[pS]GM#PFIDVP[pT]PISSASSEAASAVVSPSTDS  
 GLEFSSQTT[pS]K.E  
 355 A0A7I2V326\_HUMAN K.SS[pS]PAPADIAQTVQEDLR.-  
 356 A0A7I2V326\_HUMAN K.[pS]SSPAPADIAQTVQEDLR.-  
 357 A0A7I2V326\_HUMAN K.S[pS]SPAPADIAQTVQEDLR.-  
 358 A0A7I2V349\_HUMAN K.M#APPPKEVEED[pS]EDEEM[pS]EDEEDDS[pS]  
 GEEVVIPQKK.G  
 359 A0A7I2V349\_HUMAN K.M#APPPKEVEED[pS]EDEEM[pS]EDEEDD[pS]S  
 GEEVVIPQKK.G  
 360 A0A7I2V351\_HUMAN R.NVSSFPDDAT[pS]PLQENR.N  
 361 A0A7I2V3E2\_HUMAN K.NLEELEEKST[pT]PPPAEPVSLPQEPPK.A  
 -  
 362 A0A7I2V3K8\_HUMAN .HVW[pS]AGCVLAELLLGQPIFPGDSGVDQLVEII  
 KV[pS]PRNSI.-  
 363 A0A7I2V3M5\_HUMAN R.GGL[pS]PANDTGAK.K  
 -  
 364 A0A7I2V3V6\_HUMAN .M#CG[pT]LLILDPEAGLRLFRSVALTGMMVCL  
 M.-  
 365 A0A7I2V4I5\_HUMAN K.KEV[pS]PEVVR.S  
 366 A0A7I2V4J2\_HUMAN R.FGQAATMEGIGAIGG[pT]PPAFNR.A  
 367 A0A7I2V4J2\_HUMAN R.FGQAATM#EGIGAIGG[pT]PPAFNR.A  
 368 A0A7I2V5M7\_HUMAN K.SS[pS]PAPADIAQTVQEDLR.T  
 369 A0A7I2V5M7\_HUMAN R.YQDEVFGGFVTEPQEE[pS]EEVEEPEER.Q  
 370 A0A7I2V5M7\_HUMAN K.[pS]SSPAPADIAQTVQEDLR.T  
 371 A0A7I2V5M7\_HUMAN K.S[pS]SPAPADIAQTVQEDLR.T

372 A0A7I2V5S2\_HUMAN K.CGSGPVHISGQHLVAVEEDAE[pS]EDEEEEDV  
K.L

373 A0A7I2V5S2\_HUMAN K.CGSGPVHI[pS]GQHLVAVEEDAEESEDEEEEDV  
K.L

374 A0A7I2V647\_HUMAN K.ST[pT]PPPAEPVSLPQEPPKPR.V

375 A0A7I2V647\_HUMAN K.NLEELEEK[pS]TTPPAEPVSLPQEPPKPR.V

376 A0A7I2V647\_HUMAN K.NLEELEEKST[pT]PPPAEPVSLPQEPPKPR.V

377 A0A7I2V647\_HUMAN K.NLEELEEKs[pT]TTPPAEPVSLPQEPPKPR.V

378 A0A7I2V657\_HUMAN K.LVSFHDD[pS]DEDLLHI.-

379 A0A7I2V657\_HUMAN K.ALSSLHGDDQD[pS]EDEVLTIPK.V

380 A0A7I2V657\_HUMAN K.ALS[pS]LHGDDQDSEDEVLTIPK.V

381 A0A7I2Y1C3\_HUMAN K.WLREAE[ps]DHN.-  
-

382 A0A7I2YQL3\_HUMAN .ILNVNNGVPGGAAAA[pS][pS]A[pT]VAAA[pS]A  
TTAASSSLATPELGS[pS]LK.K  
-

383 A0A7P0T8C1\_HUMAN .GINV[pT][pT]AV[pS]EV[pS]VPPKG[pT]SAAWAIL  
PLLLLVM#AAVGGYLM#WR.N  
-

384 A0A7P0T8F1\_HUMAN .M[pS]QD[pT]EVDMKEVELNELEPEKQPM#NAA[  
pS]GAAM#SLAGAEK.N

385 A0A7P0T937\_HUMAN K.AEEDILNR[pS]PR.N

386 A0A7P0T937\_HUMAN K.QK[pS]DAEEDGGTVSQEEEDRKPK.A

387 A0A7P0TAY5\_HUMAN K.[pT]IDLVA YGDINGFSAM#AKTVGLP[pT]AMA  
AK.M

388 A0A7P0TB85\_HUMAN K.MFEAV[pS][pS]EQNPVIIAVVAVAGTIILVFM#  
VFGFIIGRRHCGY[pS]K.A

389 A0A7P0TBF8\_HUMAN M.[pS]QD[pT]EVDMKEVELNELEPEKQPM#NAAS  
GAAM#SLAGAEK.N

390 A0A804F729\_HUMAN R.LDID[pS]PPITAR.N

391 A0A804F729\_HUMAN R.GERLLTPGACSSSEVPSAVPSRSGG[pS]PGH[pT]  
VFSSER.S

392 A0A804HI84\_HUMAN M.AAEEGVA[pS]AA[pS]AGG[pS]WGTAAM#GRV  
LPM#LLVPVPAEAMGQLGSRAQLR.T

393 A0A804HIQ1\_HUMAN K.RLLPVVRAPNIDGSDLH[pS]AVII[pT]WINM#[p  
S][pT][pS]NK.T

394 A0A804HIV2\_HUMAN -.STPWRV[pY]HLI[pS]VMILGRVIMQIIK.D

395 A0A804HJE2\_HUMAN K.[pS]DQL[pT]PHSQASVTQNITVVPVSTGLMTA  
GVSC[pS]QR.W

396 A0A804HJH1\_HUMAN R.VKESSIIAPAPAEDVD[pT]PPR.K

397 A0A804HK06\_HUMAN K.RPG[pT]SQAGYTN YGDIAVATTEDNLSSSY[pS]

|     |                                                                            |
|-----|----------------------------------------------------------------------------|
|     | AVALDK.A                                                                   |
| 398 | A0A804HKE7_HUMAN K.DMESP[pT]KLDVTLAK.D                                     |
| 399 | A0A804HKE7_HUMAN K.DME[pS]PTKLDVTLAK.D                                     |
| 400 | A0A804HKE7_HUMAN K.DM#E[pS]PTKLDVTLAK.D                                    |
| 401 | A0A804HKE7_HUMAN K.DM#ESP[pT]KLDVTLAK.D                                    |
| 402 | A0A804HKE7_HUMAN K.VG[pS]LDNVGHLPAAGAVK.T                                  |
| 403 | A0A804HKE7_HUMAN K.KC[pS]LPAEEDSVLEK.L                                     |
| 404 | A0A804HKE7_HUMAN K.TTTAAAVASTGPS[pS]RSPSTLLPK.K                            |
| 405 | A0A804HKE7_HUMAN K.DMSPLSETEMALGKDV[pT]PPPETEVLIIK.N                       |
| 406 | A0A804HKE7_HUMAN K.TTTAAAVASTGP[pS]SRSPSTLLPK.K                            |
| 407 | A0A804HKJ8_HUMAN R.KAGR[pS]DSSSSGGGGSPSEASGLGLDFED[pS]<br>VWKPEVNPDIK.S    |
| 408 | A2A2M0_HUMAN R.TFQQIQEEEDDDYPGSY[pS]PQDPSAGPLLTEE<br>LIK.A                 |
| 409 | A2A2V1_HUMAN K.[pT]NM#KHM#AGAAAAGAVVGGGLGGYM#LG[<br>pS]AMSRPIIHFSGSDYEDR.Y |
| 410 | A2IBA6_HUMAN R.FNQDLKVAAl[pS]LM#FS[pT]G[pS]LIGPRYK.<br>L                   |
| 411 | A2MG_HUMAN K.WI[pT]KQQNAQGGF[pS][pS][pT]QDTVVALHA<br>LSKYGAA[pT]F[pT]R.T   |
| 412 | A6NGQ3_HUMAN R.EVQAEVGA[pS]ATLSCEVAQDQM#EVTWYK.<br>D                       |
| 413 | A6NNK5_HUMAN K.M#VIQGPS[pS]PQGEAMVTDVLEDQKEGR.S                            |
| 414 | A6NNK5_HUMAN K.M#VIQGPS[pS]PQGEAM#VTDVLEDQKEGR.S                           |
| 415 | A6NNK5_HUMAN R.[pS]DSPEIPFQAAAGPSDGLDASSPGNSFVGLR.<br>V                    |
| 416 | A6NNK5_HUMAN R.[pS]DSPEIPFQAAAGPSDGLDAS[pS]PGNSFVG<br>LR.V                 |
| 417 | A6NNK5_HUMAN R.R[pS]DSPEIPFQAAAGPSDGLDASSPGNSFVGL<br>R.V                   |
| 418 | A6NNK5_HUMAN K.EQL[pS]AQELMESGLQIQKSPEPEVLSTQEDLF<br>DQSNK.T               |
| 419 | ACACB_HUMAN R.QLM#TNFILGSFDDY[pS][pS]DEDSVAGSSRES<br>TRK.G                 |
| 420 | ACINU_HUMAN R.TAQVP[pS]PPR.G                                               |
| 421 | ACINU_HUMAN R.LQPERG[pS]PK.K                                               |
| 422 | ACINU_HUMAN R.TAQVP[pS]PPRGK.I                                             |
| 423 | ACINU_HUMAN R.DSSTSYPETKDPSSGQEVAl[pT]PPVPQLQVCEP<br>K.E                   |
| 424 | ACLY_HUMAN K.AKPAMPQDSVP[pS]PR.S                                           |
| 425 | ACLY_HUMAN R.TA[pS]FSESRADEVAPAK.K                                         |

426 ACLY\_HUMAN R.TA[pS]FSESRRADEVAPAKK.A  
427 ACLY\_HUMAN R.[pT]ASFSESRRADEVAPAK.K  
428 ACLY\_HUMAN R.[pT]ASFSESRRADEVAPAKK.A  
429 ADA30\_HUMAN K.VCSLE[pY]AGSVSTLLDTNILAPATW[pS]AHEL  
GHAVGM#SHDEQYCQCRGR.L  
430 ADT2\_HUMAN K.GMLPDPKNTHIVISWM#IAQ[pT]V[pT]AVAGL  
TSYPFDTVR.R  
431 AEDO\_HUMAN K.ATLQPLPPNLPPV[pT][pY]M#HIYE[pT]DGF[pS]  
LGVFLLK.S  
432 AFAP1\_HUMAN K.SGTSSPQ[pS]PVFR.H  
433 AGAP2\_HUMAN K.GSKSSAGTGASVSAAATAAAAAGGGG[pS][pT]A  
STSGGVGAGAGARGK.L  
434 AGAP7\_HUMAN K.WPSLACTLACTPISSSK[pS]DGLSKDM#DTGLGD  
SICFSPSISSTTIPK.L  
435 AGFG1\_HUMAN K.GTPSQ[pS]PVVGR.S  
436 AHNK\_HUMAN K.DIDIS[pS]PEFK.I  
437 AHNK\_HUMAN K.GGVTG[pS]PEASISGSK.G  
438 AHNK\_HUMAN R.EGAKDIDIS[pS]PEFK.I  
439 AHNK\_HUMAN R.LPSGSGAA[pS]PTGSAVDIR.A  
440 AHNK\_HUMAN K.ASLG[pS]LEGEAEAEASSPK.G  
441 AHNK\_HUMAN K.ASLGSLEGEAEAEAS[pS]PK.G  
442 AHNK\_HUMAN K.GGVTG[pS]PEASISGSKGDLK.S  
443 AHNK\_HUMAN R.LK[pS]EDGVEGDLGETQSR.T  
444 AHNK\_HUMAN K.TVIRLPSGSGAA[pS]PTGSAVDIR.A  
445 AHNK\_HUMAN K.[pT]VIRLPSGSGAASPTGSAVDIR.A  
446 AHNK\_HUMAN K.TVIRLP[pS]GSGAA[pS]PTGSAVDIR.A  
447 AHNK\_HUMAN R.SN[pS]FSDEREFSGPSTPTGTLEFEGGEVSLEGG  
K.V  
448 AHNK\_HUMAN R.SNSF[pS]DEREF[pS]GPSTPTGTLEFEGGEVSLE  
GGK.V  
449 AHNK\_HUMAN K.GGV[pT]GSPEASISGSKGDLK.S  
450 AHNK\_HUMAN K.ASLGSLEGEAEAEA[pS]SPK GK.F  
451 AHNK\_HUMAN K.TVIRLPSG[pS]GAASPTGSAVDIR.A  
452 AHNK\_HUMAN R.SNSF[pS]DEREFSGPSTPTGTLEFEGGEVSLEGG  
K.V  
453 AHNK\_HUMAN R.[pS]NSFSDEREFSGPSTPTGTLEFEGGEVSLEGG  
K.V  
454 AHNK\_HUMAN K.VDVK[pS]PK.T  
455 AHNK\_HUMAN K.GKGGVTG[pS]PEASISGSK.G  
456 AHNK\_HUMAN K.ASLG[pS]LEGEAEAEAS[pS]PK.G  
457 AHNK\_HUMAN K.ASLG[pS]LEGEAEAEAS[pS]PK GK.F

458 AHNK\_HUMAN K.A[pS]LGSLEGEAEAEAS[pS]PKGK.F  
459 AHNK\_HUMAN K.TVIRLP[pS]GSGAASPTG[pS]AVDIR.A  
460 AHNK2\_HUMAN R.DAHDV[pS]PTSTDTEAQLTVER.Q  
461 AHNK2\_HUMAN K.[pY]QVTVPRAALAPELALEIP[pS]G[pS]QADIPL  
PK.T  
462 AHNK2\_HUMAN R.DAHDVSPTS[pT]DTEAQLTVER.Q  
463 AHNK2\_HUMAN K.VEAEVSLP[pS]M#QGDLK[pT]TDISIEPPSAQLE  
VQAGQVDLK.L  
464 AHNK2\_HUMAN R.DAHDVSPT[pS]TDTEAQLTVER.Q  
465 AKA12\_HUMAN K.GLAEVQQDGEAEEGAT[pS]DGEK.K  
466 AKA12\_HUMAN K.EVSSLEG[pS]PPPCLGQEEAVCTK.I  
467 AKA12\_HUMAN K.GLAEVQQDGEAEEGAT[pS]DGEKKR.E  
468 AKA12\_HUMAN K.LKETCVSGEDPTQGADL[pS]PDEK.V  
469 AKAP2\_HUMAN R.QVLQSTQ[pS]PR.T  
470 AKAP2\_HUMAN R.DALGDSLQVPVSPS[pS]TTSSR.C  
471 AKAP2\_HUMAN K.VKPPPSP[pT]TEGPSLQPDLAPEEAAGTQRPK.N  
472 AKAP2\_HUMAN K.GQK[pS]PGALETPSAAGSQGNTASQGK.E  
473 AKT2\_HUMAN R.YFDDEFTAQSITI[pT]PPDRYDSLGLLELDQR.T  
474 AKTS1\_HUMAN R.LN[pT]SDFQK.L  
475 ALG3\_HUMAN R.SG[pS]AAQAEG LCK.Q  
476 AMER3\_HUMAN R.GPDMLEQKQSSS[pS]P[pS]M[pT]TIHGLPYSAS  
TQDQRCR.D  
477 AN32B\_HUMAN R.KRE[pT]DDEGEDD.-  
478 ANCHR\_HUMAN R.VTLQDYRLPD[pS]DDDEDEETAIQR.V  
479 ANKL2\_HUMAN R.SG[pT]PVPPP[pS]AAAAPA[pS]GEM#TM#DALL  
AR.L  
480 ANM3\_HUMAN R.GAVENEEDLPEL[pS]D[pS]GDEAAWEDEDDAD  
LPHGK.Q  
481 ANM5\_HUMAN R.IKL[pY]AVEKNPNNAVVTLENWQFEEWGSQV[p  
T]VVS[pS]DMR.E  
482 APC4\_HUMAN K.IKEEVL[pS]ESEAENQQAGAAALAPEIVIK.V  
483 APLP1\_HUMAN R.AQPAIG[pS]LAGG[pS]PGAAEAPG[pS]AQVAGL  
CGRLTLHR.D  
484 ARAP1\_HUMAN R.LFPEFDD[pS]DYDEVPEEGPGAPAR.V  
485 ARAP3\_HUMAN R.LDFTAWNA AIGGAAGGGG[pT]GLQEQQM#[pS  
]RGDIPIVDACI[pS]FVTQHGLR.L  
486 ARGL1\_HUMAN R.AS[pS]PPDRIDIFGR.T  
487 ARM12\_HUMAN K.QDEYAK[pS]MILH[pS]ITRCV[pY]LLEAEA[pS]  
AC[pT][pT]DDIVLLG[pY]M#LDDK.D  
488 ARMX3\_HUMAN R.YNDW[pS]DDDDDSNESK.S  
489 ARMX4\_HUMAN K.AM#VGAEPETQSESKVVAGTLVM[pT]EAV[pT]

LTEVKAK.A  
 490 ASPH\_HUMAN K.SSGNSSSSGSGSGSTSAGSS[pS]PGAR.R  
 491 ASPH\_HUMAN K.SSGNSSSSGSGSGSTSAGSS[pS]PGARR.E  
 492 ASTN1\_HUMAN K.VETETVLSFVDDII[pS]GAKSPCAM#PSQVPDK.  
 Q  
 493 ASTN1\_HUMAN R.DPKVLTFFPE[pY]ITSL[pS]D[pS]G[pT]KHM#AA  
 GVR.M  
 494 ATG4B\_HUMAN R.FFD[pS]EDEDFEILSL.-  
 495 ATN1\_HUMAN R.SEEI[pS]ESESEETNAPK.K  
 496 ATPF2\_HUMAN R.LLNRPAGGP[pS]A[pS]MSPGP[pT]IP[pS]PARAY  
 APP[pT]ERK.R  
 497 ATRX\_HUMAN K.LTPVSL[pS]NSPIKGADCQEVQDKDGYK.S  
 498 ATRX\_HUMAN K.SSGSSR[pS]K.R  
 499 ATRX\_HUMAN R.RPTETNPVTSN[pS]DEECNETVKEK.Q  
 500 ATRX\_HUMAN K.LTPVSLSN[pS]PIKGADCQEVQDKDGYK.S  
 501 ATX2L\_HUMAN K.STSTPT[pS]PGPR.T  
 502 ATX2L\_HUMAN K.EKEVDGLLTSEPMG[pS]PVSSK.T  
 503 ATX2L\_HUMAN K.EKEVDGLLTSEPMGSPV[pS]SK.T  
 504 ATX2L\_HUMAN K.TLSSP[pS]NRPSGETSVPPPPAVGR.M  
 505 ATX2L\_HUMAN K.TLS[pS]PSNRPSGETSVPPPPAVGR.M  
 506 B0QY63\_HUMAN R.YSQGDDDDGSSSSGSSVAGSQSTLTKD[pS]PLR  
 .T  
 507 B0YIW6\_HUMAN K.APGFGGFGSSAVSGGSTAAMITE[pT]IITDKP  
 KVAPAPARPSGPSK.A  
 508 B1AK63\_HUMAN R.EPGSGTESD[pT][pS]PDFHNQENEPSQEDPEDL  
 DGSVQGVKPK.A  
 509 B2R5W2\_HUMAN K.MESEGGADD[pS]AEEGDLLDDDDNEDRGDDQ  
 LELIK.D  
 510 B2R5W2\_HUMAN K.MESEGGADD[pS]AEEGDLLDDDDNEDRGDDQ  
 LELIKDDEK.E  
 511 B2R5W2\_HUMAN K.M#ESEGGADD[pS]AEEGDLLDDDDNEDRGDD  
 QLELIKDDEK.E  
 512 B3A2\_HUMAN R.A[pS]KGAQAGTQVEEAEAEAVAVA[pS]G[pT]A  
 GGDDGGASGRPLPK.A  
 513 B3A4\_HUMAN R.WDP[pT]ARIPPPK.C  
 514 B4DJX4\_HUMAN K.ERPI[pS]MINEA[pS]NYNV[pT][pS]D[pY]AVHP  
 M#SPVGRTSR.A  
 515 B4DQA8\_HUMAN R.MFE[pT]M#AIEIEQLLARLTGVNDKM#AEYTN  
 SAGVPSLNAALMH[pT]LQR.H  
 516 B4DY08\_HUMAN K.NDK[pS]EEEQSSSSVK.K  
 517 B4DY08\_HUMAN K.MESEGGADD[pS]AEEGDLLDDDDNEDRGDDQ



VK.T  
518 B4DY08\_HUMAN K.M#ESEGGADD[pS]AEEGDLLDDDDNEDRGDD  
QVK.T  
519 B4E135\_HUMAN R.TEEETPKESLTEAEVA[pT]EKEGEDGDQP[pT]T  
PPKPLK.T  
520 B5MC51\_HUMAN K.LS[pT]PQKK.-  
521 B7Z3B9\_HUMAN R.[pS]Y[pS]HDVLPKVSPSSTEADGELYVFNTPSG  
T[pS][pS]VE[pT]QM#R.H  
522 B7Z6W2\_HUMAN R.AQQRE[pT][pS]FATM#G[pT]EG[pS]LILSF.-  
523 B8ZZQ6\_HUMAN R.DAPANGNANEENGEQEADNEVDEEEEEEGGEE  
EEEEEGDEDEGDEDEEAE[pS]A[pT]GKR.A  
524 BAG3\_HUMAN R.SQ[pS]PAASDCSSSSSSASLPSSGR.S  
525 BAG3\_HUMAN K.VPPAPVPCPPSPGPSAVPS[pS]PK.S  
526 BAG3\_HUMAN K.VPPAPVPCPPSPGPSAVP[pS]SPK.S  
527 BARH2\_HUMAN M.[pT]M#EGA[pS]G[pS][pS]FGID[pT]IL[pS]SASSG  
SPGMM#NGDFRPLGEAR.T  
528 BASP1\_HUMAN K.ETPAATEAPSS[pT]PK.A  
529 BASP1\_HUMAN K.KTEAPAAPAAQE[pT]KSDGAPASDSKPGSSEA  
APSSK.E  
530 BASP1\_HUMAN K.KTEAPAAPAAQETK[pS]DGAPASDSKPGSSEA  
APSSK.E  
531 BAZ1A\_HUMAN K.LSSSF[pS]SR.G  
532 BAZ2B\_HUMAN K.TTSSVKSPSM#SL[pT]GH[pS][pT]PR.N  
533 BCL9L\_HUMAN R.EAPG[pS]PPLSPR.G  
534 BCOR\_HUMAN R.[pS][pS][pS]CPRM#GG[pT]DAVI[pT]NV[pS]G[pS]  
]V[pS][pS]AGRPA[pS]A[pS]PAPNANADG[pT]K[pT]  
][pS]R.S  
535 BCR\_HUMAN R.ASASRPQPAPADGADPPPAAEPEARPDGEG[pS]  
PGK.A  
536 BD1L1\_HUMAN K.SPETG[pT]AGGSSTASYSAGR.G  
537 BGP11\_HUMAN R.GKPRLGGGSLGG[pS]PAAVVWLHVHVGATGRD  
AV[pS]PR.E  
538 BI2L1\_HUMAN K.LLEENETEAVTVPTPSP[pT]PVR.S  
539 BIN1\_HUMAN R.VNHEPEPAGGATPGATLPK[pS]PSQLR.K  
540 BIN1\_HUMAN K.GNKSPSPPDG[pS]PAATPEIR.V  
541 BIN1\_HUMAN K.GNK[pS]PSPPDGSPAATPEIR.V  
542 BORG4\_HUMAN K.AGPDLPSPSHALEDEGWAAAAP[pS]PGSAR.S  
543 BORG4\_HUMAN K.AGPDLPSPSHALEDEGWAAAAPSPG[pS]AR.S  
544 BRD3\_HUMAN R.SE[pS]PPPLSDPK.Q  
545 BRE1A\_HUMAN K.ALVVPEPEPDS[pS]NQER.K  
546 BRWD3\_HUMAN R.EPR[pT]GIK.R

547 BSN\_HUMAN K.QFLNAE[pS]AYMDPM#KQNGGPL[pT]PG[pT][pS]P[pT]QLAAPV[pS]F[pS]TPT[pS][pS]D[pS][pS]GGRVIPDVR.V

548 BYST\_HUMAN R.M#PQDG[pS]DDEDEEWPTLEK.A

549 BYST\_HUMAN R.MPQDG[pS]DDEDEEWPTLEK.A

550 C2CD3\_HUMAN K.ELAANSSRS[pT][pT]PRGK.D

551 C2D1A\_HUMAN R.V[pT]LEGPSATAPAS[pS]PGLAKPQM#PPGPC[pS]PGPLAQLQ[pS]RQR.D

552 C9IZN0\_HUMAN K.[pT][pS]FSTTTLLPPIK.V

553 C9J019\_HUMAN R.SWDSSSPVDRPEPEEAASPT[pT]R.T

554 C9J019\_HUMAN R.SQDATFSPG[pS]EQAEEKSPGPIVSR.T

-

555 C9J1H7\_HUMAN .MAPPPKEVEED[pS]EDEEM[pS]EDEEDDS[pS]GEVVIPQKK.G

-

556 C9J1H7\_HUMAN .MAPPPKEVEED[pS]EDEEM[pS]EDEEDD[pS]SGEVVIPQKK.G

557 C9J813\_HUMAN K.RG[pS]IGENQIKDEK.I

558 C9JAT8\_HUMAN M.E[pS]KDEVSDTDSGILQSGPDSVSPMK.E

559 C9JC88\_HUMAN R.ASEIDQVVPAAQS[pS]PINCEKR.E

560 C9JE09\_HUMAN M.TS[pS][pS]PAGLEG[pS]DLSSINTM#M#SAVMSVGKVTENGGSPQGIK.S

561 C9JEJ2\_HUMAN R.WPFSGK[pT]SPPCSPANLSR.H

562 C9JGN4\_HUMAN R.RPP[pS]PDVIVL[pS]DNEQPS[pS]PR.V

563 C9JLB1\_HUMAN K.VVV[pS]PTK.K

564 C9JLB1\_HUMAN K.VVVSP[pT]KK.V

565 C9JLB1\_HUMAN K.KVVV[pS]PTK.K

566 C9JLB1\_HUMAN K.KVVV[pS]PTKK.V

567 C9JLB1\_HUMAN K.KVVVSP[pT]KK.V

568 C9JLB1\_HUMAN K.KED[pS]DEEEDDD[pS]EEDEEDDEDEDEDEDEI  
EPAAMK.A

569 C9JLB1\_HUMAN K.KED[pS]DEEEDDD[pS]EEDEEDDEDEDEDEDEI  
EPAAM#K.A

-

570 C9JLB1\_HUMAN .M#APPKKEVEED[pS]EDEEM[pS]EDEEDDS[pS]GEEVVIPQKK.G

-

571 C9JLB1\_HUMAN .M#APPKKEVEED[pS]EDEEM[pS]EDEEDD[pS]SGEEVVIPQKK.G

572 C9JLB1\_HUMAN K.NAKKED[pS]DEEEDDD[pS]EEDEEDDEDEDEDED  
EDEIEPAAMK.A

573 C9JLB1\_HUMAN K.AAAAAPA[pS]EDEDDEDDEDDEDDEDDDDDEEDD  
[pS]EEEAMETTPAK.G  
574 C9JLB1\_HUMAN K.NAKKED[pS]DEEEDDD[pS]EEDEEDDEDEDED  
EDEIEPAAM#K.A  
575 C9JLB1\_HUMAN K.AAAAAPA[pS]EDEDDEDDEDDEDDEDDDDDEEDD  
[pS]EEEAM#ETTPAK.G  
576 C9JLK0\_HUMAN K.NHARVTVVCEPED[pY]VVVSTEMQSSE[pS]KD  
TSLETR.R  
577 C9JMN4\_HUMAN K.MDA[pS]LG NFLFAR.S  
578 C9JQE8\_HUMAN R.EG[pT]PPPPPPSR.D  
579 C9JSQ1\_HUMAN R.L[pS]EM#[pT]EAEQQQLIDDHFLFDKPVSPLL[p  
T]AAGM#A.-  
580 C9JW69\_HUMAN K.RR[pS]PPADAIPK.S  
581 C9JW69\_HUMAN K.SGQV[pY][pS]FGCNDEGALGRDTSVEGSEMVP  
GKVELQEK.V  
582 C9JZ58\_HUMAN R.HCPEPRRGENCCA[pS]EVMAEMEFPCPCPGW[  
pS]AMAR.S  
583 C9JZE8\_HUMAN K.ELHGFEKTTACGRCI[pS]GMFVFL[pT][pY]VLG  
VAWLGVFGFSAVPVFM#FY.-  
584 C9JZI7\_HUMAN R.EFITGDVEPTDAESEWH[pS]ENEEEEKLAGDM  
#K.S  
585 CA052\_HUMAN R.LLPEGEETLE[pS]DDEKDEHTSK.K  
586 CA216\_HUMAN R.SPPEGAEIPGAEPEKM#GGAGTVCSPLEDNGY  
AS[pS][pS]LSIDSR.S  
587 CACB1\_HUMAN R.QNRLGSSKSGDNSSSSLGDVVTG[pT]R.R  
588 CAF1B\_HUMAN R.GS[pS]PGPRPVEGTPASR.T  
589 CALM1\_HUMAN R.[pS]LGQNPTEAELQDM#INEVDADGNGTIDFPE  
FL[pT]MM#AR.K  
590 CALX\_HUMAN K.QK[pS]DAEEDGG[pT]VSQEEEDRKPK.A  
591 CALX\_HUMAN K.QK[pS]DAEEDGGTV[pS]QEEEDRKPK.A  
592 CAMP2\_HUMAN K.LNQS[pS]PDNVTDTK.G  
593 CAN15\_HUMAN R.VQGCFPS[pS]ASAPVGV TALT VLER.A  
R.CRKIRPVSAFISG[pS]PQDM#E[pS]QLGNLGI PP  
594 CARL3\_HUMAN GWF[pS]GLGG[pS]QP[pT]A[pS]G[pS]WEG LSELP  
THGYK.L  
R.SSGALGLPP[pS]LLGAKD[pT]EHEE[pS]SNDDL  
595 CASZ1\_HUMAN VDFSALSSK.N  
K.ESEALPEKEGEELGEGERPEEDAAALEL[pS][pS]  
596 CAVN1\_HUMAN ]DEAVEVEEVIEESR.A  
K.APEPLGPADQSELGPEQLEAEVGE[pS][pS]DEE  
597 CAVN3\_HUMAN PVESR.A

598 CBPA5\_HUMAN -.M#QGTPGGGTRPGP[pS]PVDRR.T  
599 CBX1\_HUMAN R.KADSD[pS]EDKGEESKPK.K  
600 CBX1\_HUMAN R.KAD[pS]DSEDKGEESKPK.K  
601 CBX2\_HUMAN R.HATATKGV PATNPAPGKGTG SGLIGA[pS]GA[p  
T]M#P[pT]D[pT]SK.S  
602 CCD43\_HUMAN K.AALLAQYADVTDEEDEADEKDDSGAT[pT]MN  
IGSDK.L  
603 CCD80\_HUMAN K.KSVADLLG[pS]FEGK.R  
604 CCD80\_HUMAN R.F[pT]M#LLAMWL VCGSEPHPHATIRGSHGGR.  
K  
605 CCD86\_HUMAN R.LGGLRPE[pS]PESLTSVSR.T  
606 CCD86\_HUMAN R.LQQGAGLESPQGQPEPGAA[pS]PQR.Q  
607 CCD86\_HUMAN R.ALVEFESNPEETREPG[pS]PPSVQR.A  
608 CCD86\_HUMAN R.ALVEFESNPEETREPGSPP[pS]VQR.A  
609 CCD86\_HUMAN R.LQQGAGLESPQGQPEPGAA[pS]PQRQDLHLE  
SPQR.Q  
610 CCD86\_HUMAN R.RLGGLRPE[pS]PESLTSVSR.T  
611 CCD86\_HUMAN R.LQQGAGLESPQGQPEPGAA[pS]PQRQDLHLE  
SPQRQPEYSPEPR.C  
612 CCD86\_HUMAN R.LQQGAGLE[pS]PQGQPEPGAASPQRQDLHLE  
SPQRQPE[pY]SPE[pS]PR.C  
613 CCNL1\_HUMAN K.GLNPDGTPALSTLGGFSPA[pS]KP[pS]SPR.E  
-  
614 CCNL1\_HUMAN .M#A[pS]GPH[pS][pT]A[pT]AAAAA[pS][pS]AAP[p  
S]AGG[pS][pS][pS]G[pT][pT]TTTTTTTGGILIGDR.  
L  
615 CCNL1\_HUMAN K.AEEK[pS]PISINVK.T  
616 CCNY\_HUMAN R.[pS]ASADNLTLP.R.W  
617 CDAC1\_HUMAN R.[pS]CDGTGAM#YFVGC GYN AFPVGSEYADFP  
HMDDK.Q  
618 CDV3\_HUMAN R.AA[pS]AAGAAGSAGGSSGAAGAAGGGAGAG  
TRPGDGGTASAGAAGPGAA[pT]KAV[pT]K.D  
619 CDYL\_HUMAN R.TAVDGFQSE[pS]PEKLDPVEQQQEDTVAPEVA  
AEKPVGALLGPGAER.A  
620 CEBPB\_HUMAN R.AYLG YQAVPSGSSG[pS]LSTSSSSSPPGTPSPAD  
AK.A  
621 CEBPB\_HUMAN R.AYLG YQAVPSGSSGSL[pS]TSSSSSPPGTPSPAD  
AK.A  
622 CF223\_HUMAN R.SPGQV[pT]PR.G  
623 CGRE1\_HUMAN R.QE[pT]QEAPGPR.E  
624 CHAP1\_HUMAN R.GG[pS]PDLWK.S

625 CHAP1\_HUMAN R.KT[pS]PASLDFPESQK.S  
626 CHAP1\_HUMAN K.LAPVP[pS]PEPQKPAPV[pS]PESVK.A  
627 CHAP1\_HUMAN R.KP[pS]PSESPEPWKPFPAVSPEPR.R  
628 CHAP1\_HUMAN K.LAPVP[pS]PEPQKPAPVSPE[pS]VK.A  
629 CHD3\_HUMAN R.IGEKM#ETEADAP[pS]PAPSLGER.L  
630 CHIP\_HUMAN R.LGAGGG[pS]PEKSPSAQELK.E  
631 CHRC1\_HUMAN R.VIM#K[pS][pS]PEV[pS][pS]INQEALVL[pT]AKA[  
pT]ELFVQCLATY[pS][pY]R.H  
632 CHSP1\_HUMAN R.TF[pS]ATVR.A  
633 CIR1\_HUMAN R.NLTANDPSQEYVA[pS]EGEEDPEVEFLK.S  
634 CMAS1\_HUMAN M.HHVRQLMM#PICPM#ALN[pS]TTSSSTTFGAF  
R.I  
635 CNNM3\_HUMAN K.TTTAAGSSHSRPGVPVEG[pS]PGRNPGV.-  
636 CO2A1\_HUMAN R.GF[pT]GLQGLPGPPGP[pS]GDQGA[pS]GPAGPS  
GPRGPPGPVGP[pS]GK.D  
637 CO3A1\_HUMAN R.GMPGSPGGPGSDGKPGPPGSQGESGRPGPPGP[  
pS]GPR.G  
638 CO3A1\_HUMAN R.GM#PGSPGGPG[pS]DGKPGPPGSQGESGRPGPP  
GPSGPRGQPGVM#GFPGPK.G  
639 CO3A1\_HUMAN R.GM#PG[pS]PGGPG[pS]DGKPGPPG[pS]QGE[pS]  
GRPGPPGPSGPRGQPGVM#GFPGPK.G  
640 CO5\_HUMAN R.IVACASYKPSREESSSGSSHAVM#DI[pS]LPTGI  
SANEEDLK.A  
641 CO5\_HUMAN R.E[pT]VL[pT]FIDPEGSEVDM#VEEIDHIGII[pS]FP  
DFK.I  
642 CO9A2\_HUMAN K.DG[pT]PGTPGM#KGSAGQAGQPG[pS]PGHQGL  
AGVPGQPGTK.G  
643 COCA1\_HUMAN K.AALVIQQ[pS]GFSVFVVGADVD[pY]NELANI  
ASKP[pS]ER.H  
644 COCA1\_HUMAN R.QHAL[pS]VGPQTTLSVRDLSADTEYQISVSA  
M#KGM#T[pS][pS]EPI[pS]IMEK.T  
645 COHA1\_HUMAN R.GSSSS[pS]H[pS][pS][pS]VRRGSSYSSSM#STGG  
GGAGSLGAGGAFGEAAGDR.G  
646 COHA1\_HUMAN R.GSSSSSHSSSVRRG[pS][pS]Y[pS][pS]SM#STGG  
GGAGSLGAGGAFGEAAGDR.G  
647 COHA1\_HUMAN R.GSS[pS][pS][pS]H[pS]SSVRRGSSYSSSM#STGG  
GGAGSLGAGGAFGEAAGDR.G  
648 COQA1\_HUMAN K.SVDQA[pS]SRK.-  
649 CORA1\_HUMAN K.G[pY]QGQLGEM#GVPGDPGPPGTPGPKG[pS]R  
G[pS]LGPTGAPGR.M  
650 CORA1\_HUMAN M.GAG[pS]ARGAR.G

651 CORA1\_HUMAN R.[pT]GAKGAKGYQGQLGEM#GVPGDPGPPG[pT]  
]PGPK.G  
652 CP2S1\_HUMAN R.CLVETFQG[pT]EGRPFDP[pS]LLLAQATSNVVC  
SLLFGLRFSYEDK.E  
653 CPSF2\_HUMAN K.EADID[pS][pS]DE[pS]DIEEDIDQPSAHK.T  
654 CPSM\_HUMAN K.EIGF[pS]DK.Q  
655 CR063\_HUMAN K.NT[pS]VLGSPK.R  
656 CRLF2\_HUMAN R.M#LDPQ[pT]EEKEASGG[pS]LQLPHQPLQGGD  
VV[pT]IGGFTFVM#NDR[pS][pY]VAL.-  
657 CRTC3\_HUMAN R.SQLSFLPTEAQAQV[pS]PPPPYPAPQELTQPLL  
QQPR.A  
658 CS024\_HUMAN R.YGLLANTEDPTEMA[pS]LD[pS]DEETVFESR.N  
659 CSKI1\_HUMAN R.A[pS]DLAG[pS]VD[pT]G[pS]AGSVKSIAAM#LE  
L[pS][pS]IGGGGRAAR.R  
660 CSN3\_HUMAN R.AL[pY]FYEQAIT[pT]PAM#AV[pS]HIM#LE[pS]Y  
KKYILVSLILGK.V  
661 CSPG2\_HUMAN K.AVTADGFP[pT]V[pS]VMLPLH[pS]EQNK[pS]SP  
DPTSTLSNTVS[pY]ERSTDGSFQDR.F  
662 CSRP1\_HUMAN K.GFGFGQGAGALVH[pS]E.-  
663 CTNA1\_HUMAN R.SRT[pS]VQTEDDQLIAGQSAR.A  
664 CTNA1\_HUMAN R.TPEELDD[pS]DFETEDFDVR.S  
665 CTNA1\_HUMAN R.DLIYKQLQQAVTGISNAAQATA[pS]DDASQHQ  
GGGGGELAYALNNFDK.Q  
666 CTR9\_HUMAN K.GGEFDEFVNDD[pT]DDDLPIK.K  
667 CTR9\_HUMAN K.KGGEFDEFVNDD[pT]DDDLPIK.K  
668 D3DPS3\_HUMAN R.LSASTASEL[pS]PK.S  
669 D3DPS3\_HUMAN K.QLPLEPESP[pS]GQVGPRPAPPQEE[pS]PSSEAK  
.S  
670 D3DPS3\_HUMAN K.QLPLEPESPSGQVGPRPAPPQEESP[pS]SEAK.S  
671 D3DPS3\_HUMAN K.QLPLEPESP[pS]GQVGPRPAPPQEESP[pS]SEAK  
.S  
672 D3DPS3\_HUMAN K.QLPLEPE[pS]PSGQVGPRPAPPQEE[pS]PSSEAK  
.S  
673 D6R8Y0\_HUMAN R.QTP[pS]PDVVLR.G  
674 D6R9B7\_HUMAN R.SKLLPTSLQNEFIPKEVLLSL[pT]YAANAGPCPE  
.-  
675 D6R9Q7\_HUMAN M.ANM#NSDSRHLGTSEVDHERDPGPMNIQFEP[  
pS]DLR.S  
676 D6RB95\_HUMAN R.[pY]AGLLLGCAWGQSLAFSGAALGCSWLGY[p  
S]SAFASCSLR.L  
677 D6RE79\_HUMAN R.[pS]LPVLGLGLLLY[pS]FAAAVVVPCL[pS][pS]

678 D6RGJ8\_HUMAN VVAGYG[pS]PGQKG[pT]VMG[pT]LR.S  
 R.TCEERPAEDG[pS]DEEDPDSMEAPTR.I  
 679 DBNL\_HUMAN R.YQEQGGEA[pS]PQRTWEQQQEVVSR.N  
 680 DC1L1\_HUMAN R.KPVTVSPTTPT[pS]PTEGEAS.-  
 681 DC1L1\_HUMAN R.DFQEYVEPGEDFPA[pS]PQRR.N  
 R.SGELGLPGAPES[pS][pT]A[pS]APGEPSPSPPC  
 682 DCA10\_HUMAN R.R  
 R.VRQEFEFNMTA[pT]HHFSVDLNASRSLSQVAM  
 #DLHEAVSM#K.L  
 683 DCST2\_HUMAN K.DSLGDDID[pS]EKD[pS]LNIVMDQGDTPLEEDL  
 K.K  
 684 DDHD2\_HUMAN R.ELPQM#M#DEVGRILCNLCGVVPGGVVCFPP[p  
 S]YEYLR.Q  
 685 DDX11\_HUMAN K.NEEP[pS]EEEIDAPKPK.K  
 686 DDX21\_HUMAN K.VTKNEEP[pS]EEEIDAPKPK.K  
 687 DDX21\_HUMAN R.YMAENPTAGVVQEEEEEDNLEYD[pS]DGNPIAP  
 TKK.I  
 688 DDX42\_HUMAN R.YM#AENPTAGVVQEEEEEDNLEYD[pS]DGNPIA  
 PTKK.I  
 689 DDX42\_HUMAN K.RANFDEENAYFEDEEEDSSNVDLPYIPAENSP[  
 pT]R.Q  
 690 DDX42\_HUMAN K.LTVEN[pS]PKQEAGISEGQGTAGEEEEEK.K  
 691 DENR\_HUMAN R.SS[pS]FSDTLEESSPIAAIFDTENLEK.I  
 692 DESP\_HUMAN K.WV[pS]VM#ERPKTCDHPIR.F  
 693 DET1\_HUMAN R.SISASKA[pS]PPGDLQNP.K.R  
 694 DFFA\_HUMAN R.SI[pS]ASKASPPGDLQNP.K.R  
 695 DFFA\_HUMAN R.SISASKA[pS]PPGDLQNP.K.R  
 696 DFFA\_HUMAN R.INEIKSEEVPAFGVA[pS]PPPLTDTPTTANAEG  
 DLPTTMGGPLPPHLALK.A  
 697 DHX9\_HUMAN R.QEAIPLDLED[pS]PPV[pS]DSEEQQESAR.A  
 698 DIDO1\_HUMAN R.SS[pS]PAGETEGDREPQARPGEGTAPLPPPGQK.  
 V  
 699 DIDO1\_HUMAN K.TAPRQEAIPLDLED[pS]PPVSD[pS]JEEQQESAR.A  
 700 DIDO1\_HUMAN K.AGLESGAEPGDGD[pS]DTTK.K  
 701 DKC1\_HUMAN M.M#ALGAAGA[pT]RVFVAM#VAAALGGHPLL  
 G  
 702 DKK1\_HUMAN VSA[pT]LNSVLNSNAIK.N  
 K.IMKNGEMPPEH[pS]PSSSDPM#ACNSPQSPAV  
 703 DLX5\_HUMAN WEPQGS[pS]R.S  
 704 DNAI3\_HUMAN R.HCAVS[pS]IENGHKK.V  
 705 DOC2A\_HUMAN K.HWSDCLQQPDAALERWHTLT[pS]ELPPAAGA  
 LSSA.-

706 DPH2\_HUMAN .M#ESM#F[pS]SPAEEAALQRETGVPGLL[pT]PLPD  
 LDGVYELER.V  
 707 DPYD\_HUMAN K.SL[pS]VNEMTLSTLK.E  
 708 DREB\_HUMAN R.LS[pS]PVLHR.L  
 709 DREB\_HUMAN R.MAPTPIP[pT]RSPSDSSTASTPVAEQIER.A  
 710 DREB\_HUMAN R.MAPTPIPTRSP[pS]DSSTASTPVAEQIER.A  
 711 DREB\_HUMAN R.M#APTPIPTR[pS]PSDSSTASTPVAEQIER.A  
 712 DREB\_HUMAN K.EGTQASEGYFSQ[pS]QEEEFQAQSEELCAK.A  
 713 DREB\_HUMAN R.MAPTPIPTR[pS]PSDSSTASTPVAEQIER.A  
 714 DTX2\_HUMAN R.VQQALAGM[pT][pS]VLM#[pS]AIGLPVCL[pS]R  
 APQPT[pS]PPA[pS]RLA[pS]K.S  
 715 DTX3L\_HUMAN R.DSLPG[pY]ESFG[pT]IVIT[pY]SM#KAGIQ[pT]E  
 EHPNPGKR.Y  
 716 DUS3L\_HUMAN R.QENCGAQQVPAGPGTS[pT]PPS[pS]PVR.T  
 717 DUS4\_HUMAN K.RLM#NRDENGGGAGGSGSHGTLGLP[pS]GGK.  
 C  
 718 DYH3\_HUMAN K.TSLTFPGSRPM#SPEQQLDVMLQQEMEM#E[pS  
 ]KEKKPSESDLER.Y  
 719 DYN2\_HUMAN K.EALNIIGDISTSTVSTPVPPPVDWTWLSASSHS  
 P[pT]PQR.R  
 720 DYN2\_HUMAN K.EALNIIGDISTSTVSTPVPPPVD[pT]WLSASS  
 HSPTPQR.R  
 721 E2QRB3\_HUMAN R.VIRCM#[pT]NTPVVVREGA[pT]VYA[pT]GTHA  
 QVEDGR.L  
 722 E5RFN4\_HUMAN R.IN[pS]AHGSDKSK.D  
 -  
 723 E5RG79\_HUMAN .METCDSPPISRQENGQ[pS][pT][pS]KLCGTTQLD  
 NEVPEK.V  
 724 E5RJW4\_HUMAN R.EISNSDGTRPVGMLGKAT[pS][pT]SDM#LLKLA  
 R.T  
 725 E7EM62\_HUMAN R.DGGSVDAIAALLCVGLM#NAH[pS]M#GIGG  
 GLFLTI[pY]NST[pT]R.K  
 726 E7EMZ9\_HUMAN R.QVSDLGSKGEHPEGDPGEVPAPSPQERGEHLN  
 [pT]EQ[pS]HEVQPGVPPPPLPK.E  
 727 E7EN72\_HUMAN R.M#SFIAPNLSIIIGAS[pT]AAKIMGVAGGL[pT]N  
 LSKMPACNIM#LLGAQR.K  
 728 E7EPM4\_HUMAN R.SSPTTSEGTSM#PTSTPGEGSTPLTSM#PD[pS][p  
 T]TPVVSSEAR.T  
 729 E7EQL5\_HUMAN R.EAEALLQSMGLTPESPIVPPPMSPS[pS]K.S  
 730 E7EQL5\_HUMAN R.EAEALLQSMGLTPESPIVPPPM#SPS[pS]K.S



731 E7EQL5\_HUMAN R.EAEALLQSMGLTPESPIVPPPMSP[pS]SK.S  
732 E7ERS3\_HUMAN R.GPTS[pS]PCEEEGDEGEEDR[pT]SDLRDEASSV  
TR.E  
733 E7ERW7\_HUMAN K.ASVLSQM#SFASQSMP[pT]IPALAL[pS]VAGIP  
GLDEAN[pT][pS]PR.L  
734 E7ERW7\_HUMAN R.G[pS]ICD[pS]CFDIGHLWNGDSKKM#EDASAY  
L[pT]LP[pS]YR.H  
735 E7EQU4\_HUMAN R.[pS]FSKEVEER.S  
736 E7EQU4\_HUMAN R.SF[pS]KEVEER.S  
737 E7EWZ4\_HUMAN K.DTPSSSM#SSPNGNSSVNRA[pS]PVNASASVQN  
WSVNR.S  
738 E7EX17\_HUMAN K.YAAL[pS]VDGEDENEGEDYAE.-  
739 E7EX40\_HUMAN K.NKDSGSDTASAIIPSTTPSVDSDDDE[pS]VVK.D  
740 E9PCT1\_HUMAN K.KPPAPP[pS]PVQSQSP[pS]TNWSPA VPVK.G  
741 E9PCT1\_HUMAN K.KPPAPP[pS]PVQSQSPS[pT]NWSPA VPVK.G  
742 E9PCT1\_HUMAN K.KPPAPPSPVQ[pS]Q[pS]PSTNWSPA VPVK.G  
743 E9PCT1\_HUMAN K.KPPAPP[pS]PVQSQSPSTNWSPA VPVK.G  
744 E9PCT1\_HUMAN K.KPPAPP[pS]PVQSQSPSTNW[pS]PA VPVK.G  
745 E9PCX8\_HUMAN R.GVGS GPHPPDTQQP[pS]PSK.A  
746 E9PGM9\_HUMAN K.VVNPLIGLLGEYGGD[pS]DYEEEEEEEQTPPPQ  
PR.T  
-  
747 E9PH58\_HUMAN .M#VFSM#AQPM#ASSSTEPYLCLAAAGENPSGK[  
pS]LA[pS]AI[pS]GK.I  
748 E9PIF5\_HUMAN -.M#DAG[pS]LYEPV[pS]PHWFYCKIIDSK.E  
749 E9PM10\_HUMAN M.SDPITLNVGGKL[pY][pT]TSLATLTSFPDSM#L  
GAMFSGKM#.-  
750 E9PM12\_HUMAN R.CEELEKTF[pT]FLQEEVR.R  
751 E9PM92\_HUMAN R.[pS]ASPDDDLGSSNWEAADLGNEERK.Q  
752 E9PM92\_HUMAN K.RSA[pS]PDDDLGSSNWEAADLGNEER.K  
753 E9PPJ0\_HUMAN K.RTATVGGAM#MG[pS][pT]HIYDM#[pS]TVM#S  
RK.G  
754 E9PQT8\_HUMAN R.APEEEAEGE[pS]GGAGATLSSAQ SARAPGAEG  
AGSSAEGTAGLSV[pS][pT]IPQP.-  
755 ECD\_HUMAN K.ILGPRPNE[pS]D[pS]DDLDDDFECLDSDDDDL  
FE[pT]HEPGEEASLK.G  
756 ECD\_HUMAN K.ILGPRPNE[pS]D[pS]DDLDDDFECLD[pS]DDD  
LDFETHEPGEEASLK.G  
757 EDC4\_HUMAN R.DSQDASAEQ[pS]DHDDEVASLASASGGFGTK.  
V  
758 EDC4\_HUMAN R.DSQDA[pS]AEQSDHDDEVASLASASGGFGTK.

V

759 EDC4\_HUMAN R.TRSPDVIS[pS]ASTALSQDIPEIASEALSR.G

760 EDC4\_HUMAN R.TRSPDVISSAS[pT]ALSQDIPEIASEALSR.G

761 EDC4\_HUMAN R.D[pS]QDASAEQSDHDDEVASLASASGGFGTK.

V

762 EDC4\_HUMAN R.TR[pS]PDVISSASTALSQDIPEIASEALSR.G

763 EDC4\_HUMAN K.GPGQVPTATSALSLELQEVEPLGLPQA[pS]PSR.

T

764 EF1B\_HUMAN K.YGPADVEDTTGSGATDSKDDDDIDLFG[pS]DD

EEEESEEAK.R

765 EF1B\_HUMAN K.YGPADVEDTTGSGATD[pS]KDDDDIDLFG[pS]

DDEEESEEAK.R

766 EF1B\_HUMAN K.YGPADVEDTTGSGATDSKDDDDIDLFG[pS]DD

EEEESEEAKR.L

767 EF1B\_HUMAN K.YGPADVEDTTGSGATDSKDDDDIDLFGSDDEE

E[pS]EEAKR.L

768 EF1B\_HUMAN K.YGPADVEDT[pT]GSGATDSKDDDDIDLFGSD

EEEESEEAKR.L

769 EF1B\_HUMAN K.YGPADVEDTTGSGATD[pS]KDDDDIDLFG[pS]

DDEEESEEAKR.L

770 EF2\_HUMAN R.AGETRF[pT]DTR.K

771 EH1L1\_HUMAN R.ANEAGGQVGPEAPRPET[pS]PEMR.S

-

772 EID2B\_HUMAN .MAEPTGLLEMSELPGDS[pS]VPQVGTASGVSDV

LR.G

773 EIF2A\_HUMAN R.SDK[pS]PDLAPTPAPQSTPR.N

774 EIF3B\_HUMAN R.TEPAAEAEAASGPSE[pS]PSPPAEELPGSHAE

PPVPAQGEAPGEQARDER.S

775 EIF3B\_HUMAN R.TEPAAEAEAASGPSE[pS]PSPPAEELPGSHAE

PPVPAQGEAPGEQAR.D

776 EIF3B\_HUMAN R.TEPAAEAEA[pS]GPSESPSPPAEELPGSHAE

PPVPAQGEAPGEQAR.D

777 EIF3B\_HUMAN R.TEPAAEAEAASGPSESP[pS]PPAAEELPGSHAE

PPVPAQGEAPGEQAR.D

778 EIF3C\_HUMAN R.TYLFTYSSVYDSISM#ETL[pS]DMFELDLP[pT]V

H[pS]II[pS]K.M

779 EIF3G\_HUMAN K.GIPLATGDT[pS]PEPELLPGAPLPPPK.E

780 EIFCL\_HUMAN K.QPLLL[pS]EDEEDTKR.V

781 EMC1\_HUMAN R.DEFNLQKM#M#VM#V[pT]ASGKLFGIES[pS][p

S]G[pT]ILWK.Q

782 EMC10\_HUMAN K.[pY]WMYIIPVVLFLM#MSGAPDTGGQGGGGG

GGGGGG[pS]GR.-  
783 ENASE\_HUMAN K.IYL[pS]MVYKLEGPTDVTVALELTTGDAGSCH  
IGGISVLNAET[pS][pS]R.H  
784 ENDD1\_HUMAN K.QVINGIESCL[pY]RLG[pS]A[pT]ISYFM#AIGEE  
LVSIPWKVLK.V  
785 ENOG\_HUMAN R.GNP[pT]VEVDL[pY][pT]AKGLFRAAVPSGAS[p  
T]GIYEALELR.D  
786 ENSA\_HUMAN K.YFD[pS]GDYNMAK.A  
787 EP300\_HUMAN R.GRQNM#QYPNPGM#G[pS]AGNLLTEPLQQG[p  
S]PQM#GGQ[pT]GLR.G  
788 EP400\_HUMAN R.VAVNALAVGEPGTASKPASPIGGP[pT]QEEK.T  
789 EP400\_HUMAN K.LIQQQVV[pT][pT]A[pS]APLQ[pT]PGAPNPAQV  
PAS[pS]D[pS]P[pS]QQPKLQM#RVPAVR.L  
790 ERBIN\_HUMAN R.TEDVMFI[pS]DNESFNPSLWEEQR.K  
791 ERIP6\_HUMAN K.DMSEM#[pS]IDRNIHRNL[pS]PGIPV[pS]VQTEE  
SWLQDLSDK.V  
792 F122A\_HUMAN K.VSTTTDSPV[pS]PAQAASPFIPDELSSK.-  
793 F171B\_HUMAN K.SMHQPKILYLEDLDL[pS][pS][pS]E[pS]G[pT]TV  
CSPEDPALRHILDGGSGVIM#EHPGEESPGR.K  
794 F173B\_HUMAN R.EGVHGSAKFYISDLWKV[pT]FSQYSNVVIFGV  
PQM#M#LQLEK.K  
795 F199X\_HUMAN R.SNFSCASTSGVSGASASAS[pS][pS][pS]A[pS]M#  
V[pS][pS]A[pS][pS][pS]G[pS][pS]VGN[pS]A[pS]N[p  
S][pS]ANM[pS]RAH[pS]D[pS]NL[pS]ASAAER.I  
796 F1T0I1\_HUMAN K.QIDS[pS]PVGGETDETTVSQNYR.G  
797 F1T0I1\_HUMAN R.GSV[pS]QP[pS][pT]PSPPKPTGIFQTSANSSFEPV  
K.S  
798 F1T0I1\_HUMAN R.ADSGPTQPPLSL[pS]PAPETK.R  
799 F2Z2J1\_HUMAN R.GF[pS]FVASSLIQEP[pS]QQDLHKVPVHPIVQQ  
LHGNNIHF[pT]DG[pY]EIK.E  
800 F2Z3H6\_HUMAN K.VDSSTNSSPSPQQSE[pS]L[pS]PAHTSDFR.T  
801 F5GWU3\_HUMAN R.GCA[pS]DGAAGGSEIQVRALAGPDQGI[pT]EIL  
MNRPSAR.N  
802 F5GX09\_HUMAN K.ISNL[pS]PEEEQGLWK.Q  
803 F5H047\_HUMAN R.DSSDSADGRA[pT]PSENLPSSAR.V  
804 F5H2G4\_HUMAN R.[pY]PQSCQMLLNQLREI[pT]GIQDP[pS]FLHEAL  
K.A  
805 F5H2G4\_HUMAN R.YPQ[pS]CQMLLNQLREI[pT]GIQDP[pS]FLHEAL  
K.A  
806 F5H2N6\_HUMAN R.NSLTIDHV[pS]DLMTINLLGK.E  
807 F5H629\_HUMAN R.TQSESRPQSLQQPATSTTETPA[pS]PAHTTPQT

QSTSGR.R

808 F5H7I3\_HUMAN R.AL[pT]PDEIAM#YF[pT]AAIGKHALL[pS]STLPS  
LFM#T[pS][pT]A[pS]PVM#P[pT]DAYHPIL.-

809 F5H8D7\_HUMAN K.TKPTQAAGPS[pS]PQKPPTPEETK.A

810 F5H8D7\_HUMAN K.TKPTQAAGP[pS]SPQKPP[pT]PEETK.A  
-

811 F8VNV8\_HUMAN .M#YDDSYVPGFEDSEAG[pS]ADSYTSRPSLSD  
VSLEEDR.E  
-

812 F8VRN2\_HUMAN .MED[pS]HKSTTSETAPQPGSAVQGAHISHIAQQ  
GL[pT]L[pS]PR.L

813 F8VUX9\_HUMAN R.TPGGPHQKQTFSSGPGIAISSLSV[pS]PAMCA  
VG[pS]EDGFLR.L  
-

814 F8VW32\_HUMAN .M[pS]EEEQSGTGGCGLPSSFSPLDSSLPEDIPV  
FTAAAAATPVP[pS]VVL[pT]R.S  
-

815 F8VW95\_HUMAN .M#LPGSRM#TPQGP[pS]M#GPPGYGGNPSVRPG  
LAQSGM#DQ[pS]RK.R

816 F8W646\_HUMAN K.SE[pS]PKEPEQLRK.L

817 F8W6G6\_HUMAN R.[pS][pS]NPHLLSFPSEPLELM#VSGPEDQPLNPP  
GSGPQNAPGLGSGAG[pT]RAAGLGR.Y

818 F8W726\_HUMAN R.RYP[pS]SISSSPQKDLTQAK.N

819 F8W9U4\_HUMAN K.VG[pS]LDNVGHLPAGGAVK.I

820 F8WAE5\_HUMAN R.[pS]DKSPDLAPTAPQSTPR.N

821 F8WBF9\_HUMAN R.[pY]QYP[pT]M#DELAEM#LPPVLTHL[pS]LK.S

822 F8WBS8\_HUMAN R.DKAPVQPQQ[pS]PAAAPGGTDEKPSGK.E

823 F8WBW2\_HUMAN R.YEILTVVMLPPEGEEEEKTQAYYVIKVM#[pS]M  
#[pS].-

824 F8WBW2\_HUMAN R.[pY]EILTVVM#LPPEGEEEEK[pT]QAYYVIKVM#  
M#S.-

825 F8WBW2\_HUMAN R.[pY]EILTVVM#LPPEGEEEEK[pT]QAYYVIKVM#  
SMS.-

826 F8WC89\_HUMAN R.TLEEVVMAEEEEDEGTDRPG[pS]PA.-

827 F8WD91\_HUMAN M.ETESGPQ[pT]SNQMQTDSLSPSPNPVSPVPLNN  
PTSAPR.Y

828 F8WE74\_HUMAN R.M#KL[pS]SLDVFIIGAVAKAIATTV[pT]YPLQ[p  
T]VQ[pS]ILR.L

829 FAT2\_HUMAN R.DTSRLE[pY]LILSGNQDRHFFIN[pS][pS]SGIISM  
#FNLCK.K

830 FCERB\_HUMAN K.AGYPFWGAIFFSI[pS]GM#LSII[pS]ERRNATYL

VR.G

831 FCSK\_HUMAN R.GGLR[pS]GPAANPEWMPFSYLECGDLAAGV  
EALAQRDK.W

832 FHDC1\_HUMAN K.RY[pS]EPVSLGSAQ[pS]PPLSPLALGIK.E

833 FHOD1\_HUMAN R.GRM#[pT]E[pT]EKFSGVAGEAPSNPSVPVAVS[  
pS]GPGR.G

834 FIP1\_HUMAN K.VTETEDD[pS]D[pS]D[pS]DDDEDVHVVTIGDIK  
.T

835 FKB15\_HUMAN R.RP[pS]QEQSASASSGQPQAPLNR.E

836 FKB15\_HUMAN R.LSLTSDPEEGDPLALGPE[pS]PGEPQPPQLK.K

837 FLII\_HUMAN R.NAEAVLQ[pS]PGLSGK.V

838 FLNA\_HUMAN K.CSGPGL[pS]PGMVR.A

839 FLNA\_HUMAN K.AFGPGLQGGGSAQ[pS]PAR.F

840 FLNA\_HUMAN K.FNEEHIPDSPFVVPVA[pS]PSGDAR.R

841 FLNA\_HUMAN R.L[pY][pS]VSYLLKDK.G

842 FLNC\_HUMAN R.LG[pS]FGSITR.Q

843 FLNC\_HUMAN M.M#NN[pS]GY[pS]DAGLGLGDETDEMPSTEKD  
LAEDAPWKK.I

844 FNBP4\_HUMAN K.ATGGLCLLGAYAD[pS]DDDDNDVSEK.L

845 FOXA1\_HUMAN K.CEKQPGAGGGGGSGSGGSAKGGPE[pS]R.K

846 FOXK1\_HUMAN R.SGGLQ[pT]PECL[pS]REG[pS]PIPHDPEFGSK.L

847 FOXK1\_HUMAN R.SAPA[pS]PHTPGLMSPR.S

848 FOXK1\_HUMAN R.QPSVTIGRNSSQG[pS]VDLSMGLSSFISR.R

849 FOXK1\_HUMAN R.SGGLQTPECL[pS]REG[pS]PIPHDPEFGSK.L

850 FOXK2\_HUMAN R.EG[pS]PAPLEPEPGAAQPK.L

851 FR1L6\_HUMAN K.E[pS]LLSILIYDHDM#IG[pT]DDLIGETKIDLENR  
.F

852 FRIH\_HUMAN K.MGAPESGLAEYLFDKHTLGDSNDNE[pS].-

853 FRIH\_HUMAN K.M#GAPESGLAE[pY]LFDKHTLGDSNES.-

854 FRPD4\_HUMAN R.[pT]K[pS][pS]GWPPPSGTWGLSQVPPYGWEMT  
ANR.D

855 FSIP2\_HUMAN K.CVEM#F[pS]QDL[pS]VDIKP[pS]LAA[pS]DELLT  
SSNGKPLK.N

856 FSIP2\_HUMAN R.YAISQA[pY]S[pY]VD[pS]QNI[pS]VM#ENTLLP  
YLPLQVK.K

857 FTMT\_HUMAN K.SIKELGDHVNHLVKMGAPDAGLAE[pY]LFDT  
H[pT]LGNNENK.Q

858 FUBP1\_HUMAN R.QQAAYYAQT[pS]PQGMPQHPPAPQGQ.-

859 FXR2\_HUMAN R.TDG[pS]ISGDRQPVTVADYISR.A

860 G3V164\_HUMAN K.GECG[pS]GGGD[pS]KDK[pT][pS]ALSLSNVAG  
VFYILVGGGLGLAM#LVALIEFCYK.S

861 G3V192\_HUMAN K.MGAPESGLAEYLFDKHTLGD[pS]DNES.-  
862 G3V192\_HUMAN K.M#GAPESGLAEYLFDKHTLGSDNE[pS].-  
863 G3V192\_HUMAN K.M#GAPESGLAEYLFDKH[pT]LGSDNES.-  
864 G3V192\_HUMAN R.KM#GAPESGLAEYLFDKHTLGSDNE[pS].-  
865 G3V198\_HUMAN R.LIRPEYAWIVQPVSGAVYDRPGA[pS]PK.R  
866 G3V236\_HUMAN R.L[pS][pY][pT]APP[pS]FKEHA[pT]NENRGEVA[pS]  
KPSSELAHIMASN[pT]M#QVEEPPK.S  
867 G3V5V3\_HUMAN K.DQD[pS]VGEMKDEGEE[pT]LNYPD[pT][pT]IDL  
SHLQPQR[pS]IQK.L  
868 G3XAC6\_HUMAN R.YR[pS]PYSGPK.F  
869 G3XAM7\_HUMAN R.[pT]PEELDDSDFETEDFDVR.S  
870 G5E972\_HUMAN R.AK[pT]PVTLK.Q  
871 G5E972\_HUMAN K.GPPDF[pS]SDEEREPTPVLGSGAAAAGR.S  
872 G5E972\_HUMAN K.GPPDF[pS][pS]DEEREP[pT]PVLGSGAAAAGR.S  
873 G5E972\_HUMAN R.NRPPLPAGTNSKGPPDF[pS][pS]DEEREPTPVL  
GSGAAAAGR.S  
874 G5EA03\_HUMAN R.RTGM[pS]LR.H  
875 G5EA03\_HUMAN K.IIED[pT]VVPFTVSSSSADQLSTSSSM#TEGSG[pT]  
M#NK.I  
876 GALK1\_HUMAN R.AQVCQQAHEH[pS]FAGMPCGIM#DQFI[pS]LM#  
GQK.G  
877 GALK1\_HUMAN R.M[pT]GGGFGGC[pT]VTLLEASAAPHAM#RHIQ  
EH[pY]GG[pT]A[pT]FYL[pS]QAADGAKVLCL.-  
-  
878 GBX1\_HUMAN .MQRAGGGSAPGGNGGGGGGGPG[pT]AFSID[pS]  
LIGPPPPR.S  
879 GCR\_HUMAN K.LYTTDQSTFDILQDLEFS[pS]GSPGKETNESPW  
R.S  
880 GFRA2\_HUMAN K.EL[pS]M#CF[pT]EL[pT]TNIIPGSNKVIKPNSSGP[  
pS]R.A  
881 GGT1\_HUMAN R.DGGSVDAIAALLCVGLM#NAH[pS]M#GIGG  
GLFL[pT]IYN[pS]TTR.K  
882 GGYF2\_HUMAN R.ALSSGGSIT[pS]PPLSPALPK.Y  
883 GGYF2\_HUMAN R.VGVEASEETPQTSSSSARPG[pT]PSDHQSQEAS  
QFER.K  
884 GGYF2\_HUMAN R.VGVEASEETPQTSSSS[pS]ARPGTPSDHQSQEAS  
QFER.K  
885 GGYF2\_HUMAN R.ALSSGGSI[pT]SPPLSPALPK.Y  
886 GGYF2\_HUMAN R.VGVEASEETPQTSSSSARPGTP[pS]DHQSQEAS  
QFER.K  
887 GLRA3\_HUMAN R.F[pS]F[pT]AYGM#GPCLQAKDGM#TPKGPNHP

VQVMPK.S

888 GOG8C\_HUMAN K.EPEAAVPAPGPGGES[pS]GFM#DHLEEK.A

889 GOG8C\_HUMAN K.V[pY]HPI[pT]KPGGSAKDAAPGGGHHQAGPGQ  
GGDEGEAAGAAGDGVAAAGGD[pY]KGH[pS]K.F

890 GON4L\_HUMAN K.AAEATVCANN[pS]KVSSTGEKVVLW[pT]R.E

891 GORS2\_HUMAN K.ADAASSLTVDV[pT]PPTAK.A

892 GORS2\_HUMAN R.VGDSTPVSEKPVSAAVDANASE[pS]P.-

893 GP135\_HUMAN R.M#SSSNPA[pS]GVAGDVAMWARKNPVVLFCR.  
E

894 GPN1\_HUMAN R.GTLDEEDEEAD[pS]DTDDIDHR.V

895 GRM1\_HUMAN K.ICTRKPRFMSAWAQVIIASILISVQLTLVVTLII  
M#EPPMPILSYP[pS]IK.E

896 GSAML\_HUMAN K.SQEVSS[pT][pS]NQENENG[pS]G[pS]EEVC[pY][  
pT]VINHIPHQR[pS][pS]LSSNDDG[pY]ENIDSLTR  
K.V

897 GSK3A\_HUMAN R.GEPNV[pS]YICSR.Y

898 GSK3A\_HUMAN K.ASVGAM#GGGVGASSSGGGPGG[pS]GGGG[pS]  
]GGPGAGTSFPPPGVKLGRDSGK.V

899 GT2D1\_HUMAN K.DTTKLEPA[pS]PPEDTSAEVSRA

900 GTF2I\_HUMAN R.TN[pT]PVKEDWNVR.I

901 GTF2I\_HUMAN K.RPRSPGSN[pS]KVPEIEVTVEGPNNNNPQTSAV  
R.T

902 GTR14\_HUMAN K.DGVMGMN[pS]IEPAK.E

903 H0Y2M0\_HUMAN K.KIHK[pT]SR.E

904 H0Y2Y8\_HUMAN K.FTPVASKF[pS]PGAPGGSGSQPNQK.L

905 H0Y2Y8\_HUMAN R.GPPASSPAPAPKF[pS]PVTPK.F

906 H0Y3P2\_HUMAN R.TQ[pT]PPLGQTPQLGLK.T

907 H0Y449\_HUMAN R.NYQQNYQN[pS]ESGEKNEGSESAPEGQAQQR.  
R

908 H0Y449\_HUMAN R.NYQQNYQNSESGEKNEG[pS]ESAPEGQAQQR.  
R

909 H0Y449\_HUMAN R.NYQQNYQNSE[pS]GEKNEG[pS]ESAPEGQAQQ  
R.R

910 H0Y449\_HUMAN R.NYQQNYQNSE[pS]GEKNEGSESAPEGQAQQR.  
R

911 H0Y449\_HUMAN R.NYQQN[pY]QNSE[pS]GEKNEGSESAPEGQAQQ  
R.R

912 H0Y4E7\_HUMAN R.EVSSRP[pS][pT]PGLSVVSGISATSEDIPNKIEDL  
R.S

913 H0Y4E7\_HUMAN R.EV[pS][pS]RPSTPGLSVVSGISATSEDIPNKIEDL  
R.S

914 H0Y4R1\_HUMAN .EM#DTVTEAGMAIAM#AL[pT]GGIGFIHHNC[pT]  
 PEFQANEVR.K  
 915 H0Y4X3\_HUMAN K.DK[pS]PVREPIDNLTPEER.D  
 916 H0Y503\_HUMAN K.FVEWLKNAEEEE[pS]E[pS]EAEEGD.-  
 917 H0Y579\_HUMAN K.QEKPAEKPAETPVATSP[pT]ATDSTSGDSSR.S  
 918 H0Y5T1\_HUMAN R.SSSPGKLLG[pS]GYGGLTGGSSR.G  
 919 H0Y626\_HUMAN R.ETEEQD[pS]DSAEQGDPAEGEGKEVLCDFCLDD  
 TR.R  
 920 H0Y659\_HUMAN K.QTGRGLSSGLGSAS[pS]IQAAVRQLEAEADAI  
 QM#[pS]E[pS][pS]QSEASVR.R  
 921 H0Y6E7\_HUMAN R.DVYL[pS]PR.D  
 922 H0Y6E7\_HUMAN R.DVYL[pS]PRDDGYSTK.D  
 923 H0Y6F5\_HUMAN R.VPEAS[pS]EPFDTSSPQAGR.Q  
 924 H0Y6J6\_HUMAN R.RPDPD[pS]DEDEDYER.E  
 -  
 925 H0Y6M6\_HUMAN .FG[pS]GGGG[pS]TGGGGGTAGGGTQSTAGPGGI[  
 pS]QHL[pT]Y[pT][pS][pY]ILK.Q  
 926 H0Y704\_HUMAN R.GGQGDPAVPAQQPADP[pS]TPERQS[pS]PSGSE  
 QLVR.R  
 927 H0Y746\_HUMAN R.LMGLLSDPELGPAAADGFSLLM[pS]DC[pT]DV  
 L[pT]RAGHAEVR.I  
 928 H0Y7Z1\_HUMAN R.TNTNVNCPIECFMPLDVQADRED[pS]RE.-  
 929 H0Y995\_HUMAN R.DGLM#YEQ[pY]RMDSGNTRDM#TLIHGYFGS[  
 pT]QGLSDELAK.Q  
 -  
 930 H0Y9B0\_HUMAN .NM#E[pT]GM#I[pY]VVQGIYGYHHYMQDRIDDN  
 GWGCAYRSLQTICSWFK.H  
 931 H0Y9Y2\_HUMAN K.SVSDPVEDKKEQE[pS]DEEEEEEEDEPSGATT  
 R.S  
 932 H0Y9Z8\_HUMAN K.TLHCEG[pT]EINSDDQESKEVEETATAK.N  
 933 H0Y9Z8\_HUMAN K.TLHCEGTEIN[pS]DDEQESKEVEETATAK.N  
 934 H0YA21\_HUMAN K.IFPS[pS]D[pS]QLDPLVVEL[pS]RPGPL[pT][pS]A  
 LFLFLH[pS]M#K.E  
 935 H0YA82\_HUMAN R.SRPTSEG[pS]DIESTEPQK.Q  
 936 H0YA82\_HUMAN R.SRPT[pS]EGSDIESTEPQK.Q  
 -  
 937 H0YAA4\_HUMAN .GNGALKTSSGFLAK[pS][pS]IVEEL[pS]VQWM#E  
 YHYK.D  
 938 H0YAC7\_HUMAN R.STAQQELDGKPA[pS]PTPVIVASHTANKEEK.Q  
 939 H0YAJ8\_HUMAN -.ISNASSQLSSPPT[pS]PQSSPR.K



940 H0YAS6\_HUMAN .QA[pS]SQVPRVM#STQRVANTSTQ[pT]MGPRPA  
 AAAAAA[pT]PAVR.T  
 -  
 941 H0YAX2\_HUMAN .II[pS]LKILNLEGQQFPDEE[pT][pS]EKFA[pY]ILG[  
 pS]LSNLEELILPTGDIYR.V  
 -  
 942 H0YAY4\_HUMAN .GTSQMPKGVLM#SLTPSQGTHTFDPVTKML[p  
 S]WDVGK.I  
 943 H0YAZ3\_HUMAN R.LCDDGPQLPT[pS]PR.L  
 -  
 944 H0YBF4\_HUMAN .[pS]PNE[pS]NFLEFV[pS]LLE[pS]IN[pT]SKM#TA[  
 pS][pS]QLNG[pS]AEQNEE[pS]GLLRDNC[pS]QEK.  
 K  
 -  
 945 H0YBK9\_HUMAN .G[pT]GNSIM#VM#KM#NG[pS]LHQELKIEENFK.  
 D  
 946 H0YBW0\_HUMAN R.NLFL[pT]NSPES[pS]NDCEDNPTRNRGFSK.R  
 947 H0YC13\_HUMAN -.IFPTEIH[pS]GLLEVISp[pS]PHFYPDFSR.L  
 -  
 948 H0YC16\_HUMAN .PIDN[pT]KGQM#LGLGNP[pS]F[pS]DPF[pT]GAG  
 RYVPG[pS]A[pS]M#GT[pT]M#AGVDPF[pT]GN[pS  
 ]AYR.S  
 949 H0YC41\_HUMAN R.SFLSEPS[pS]PGR.T  
 950 H0YC88\_HUMAN R.GLMAGGRPEGQY[pS]EDED[pT]DTDEYKEAK.  
 A  
 951 H0YC88\_HUMAN R.GLM#AGGRPEGQ[pY]SEDED[pT]DTDEYKEAK  
 .A  
 952 H0YCF9\_HUMAN R.LYYDGCAM#IAM#NG[pS]VFAQG[pS]QFSLDD  
 VLGGQGAVTLGS[pS]QR.T  
 953 H0YCG1\_HUMAN R.SSLGQSA[pS]ETEEDTVSVSKK.E  
 954 H0YCG1\_HUMAN R.SSLGQ[pS]A[pS]ETEEDTVSVSKK.E  
 955 H0YCG1\_HUMAN R.SRGSd[pS]PAADVEIEYVTEEPEIYEPNFIFFK.R  
 956 H0YCG1\_HUMAN R.SSLGQ[pS]A[pS]ETEEDTVSVSKK.K  
 957 H0YCM3\_HUMAN -.V[pT]DAQGFLPAR.D  
 958 H0YCN2\_HUMAN K.TFLDKDAQRL[pS]PIPEEVPK.S  
 959 H0YCN2\_HUMAN K.STLESEKPG[pS]PEAAE[pT]SPPSNIIDHCEK.L  
 960 H0YCN2\_HUMAN K.STLESEKPG[pS]PEAAETSPPSNIIDHCEK.L  
 961 H0YD46\_HUMAN R.VAL[pS]DDETKETENMR.K  
 -  
 962 H0YD54\_HUMAN .[pS]FM#RLPLI[pS]VALVQGWALGGGAEFT[pT]A

CDF[pS]FR.H

963 H0YDD8\_HUMAN K.KEESEE[pS]DDDMGFGLFD.-

964 H0YDD8\_HUMAN K.KEESEE[pS]DDDM#GFGLFD.-

965 H0YDD8\_HUMAN K.KEE[pS]EE[pS]DDDMGFGLFD.-

966 H0YDD8\_HUMAN K.KEE[pS]EE[pS]DDDM#GFGLFD.-

967 H0YDN1\_HUMAN R.[pS]SSVGSSSSYPISPAV[pS]R.T

968 H0YDT6\_HUMAN K.[pT]CFSPNRVIGLSSDLQQVGGASAR.I

969 H0YEH2\_HUMAN R.SESGGLGVSMVEYVLSS[pS]PGDSCLR.K

970 H0YEN2\_HUMAN R.IQQFDDGG[pS]DEEDIWEEK.H

971 H0YER7\_HUMAN R.ASEDTT[pS]GSPPKK.S

972 H0YER7\_HUMAN R.ASEDTTSG[pS]PPKK.S

973 H0YEU2\_HUMAN K.DEILPT[pT]PISEQK.G

974 H0YEU2\_HUMAN K.DEILP[pT]TPISEQK.G

-

975 H0YF49\_HUMAN .GSGLYSPVSED[pS]TVPQFEAPSPSHSLEFSSDM  
HR.I

-

976 H0YFB7\_HUMAN .YDYLM#QLM#NDKCLM[pS][pS]LPNFCGIFNHL  
ER.L

977 H0YGK9\_HUMAN R.EVAEGGLPRAESPPGLTP[pS]R.R

978 H0YGQ3\_HUMAN R.YGTL[pT]GELHM#IELEKGH[pS]GLGL[pS]LAG  
NKDR.S

979 H0YGW5\_HUMAN K.GDGE[pT]M#[pT]ND[pY]VVHGPASVPLGYVPH  
PSSLSG[pS]LPGM[pS]RGK.S

980 H0YHX9\_HUMAN K.VQGEAVSNIQENTQTPTVQEE[pS]EEEEVDETG  
VEVKDIELVMSQANVSR.A

981 H0YHZ9\_HUMAN K.LGPRPLPTFPTSECT[pS]DVEPDTR.E

-

982 H0YIJ2\_HUMAN .YQVWGGQPV[pY]PQE[pT]DDACIFPDGGPCP[pS]  
]G[pS]WSQKR.S

-

983 H0YIJ2\_HUMAN .[pY]QVWGGQPV[pY]PQETDDACIFPDGGPCP[pS]  
]GSW[pS]QKR.S

-

984 H0YIJ2\_HUMAN .[pY]QVWGGQPVYPQE[pT]DDACIFPDGGPCP[pS]  
]G[pS]WSQKR.S

985 H0YIL7\_HUMAN R.STGVSFWTQDSDENEQEQQ[pS]DTEEGSNKK.  
E

986 H0YIL7\_HUMAN R.STGVSFWTQD[pS]DENEQEQQ[pS]DTEEGSNK  
K.E

987 H0YIT5\_HUMAN R.IRGMSNCSM#TPM#T[pS]APR[pT]GSIRPPDSL

M#TPK.L  
 988 H0YIV4\_HUMAN R.LDGLVE[pT]PTGYIESLPR.V  
 989 H0YJ03\_HUMAN K.ESLKEEDE[pS]DDDNM.-  
 990 H0YJ03\_HUMAN K.ESLKEEDE[pS]DDDNM#.-  
 991 H0YJ60\_HUMAN R.G[pS]L[pS][pS]SPEEM#SGAEEGRETSSGIEVEA  
 SDLSLSLTGDDGGPNRTSTE[pS]R.G  
 992 H0YJA2\_HUMAN R.DLVQPKPA[pS]PK.F  
 993 H0YKB1\_HUMAN K.VQIPVSRPDPEPV[pS]DNEED[pS]YDEEIHDP  
 S  
 994 H0YKH0\_HUMAN R.ESSANNSV[pS]PSESLR.A  
 995 H0YKH0\_HUMAN K.DAPT[pS]PASVASSSSTPSSK.T  
 996 H0YKH0\_HUMAN K.[pS]NTPTPRNDAPTPGTSTTPGLR[pS]M#PGKP  
 PGM#DPIA[pS]ALR.T  
 997 H0YL97\_HUMAN R.CLYLSI[pS]ATSLAL[pS]LMLGPACR.S  
 -  
 998 H0YLB0\_HUMAN .MRLDNM#LLAEGVAGPEKGGGSAAAAAAAAAA[  
 pS]GGAG[pS]DN[pS]VEHSDYR.A  
 999 H0YLG5\_HUMAN R.SQ[pS]LPNSLDYTQTSDPGR.H  
 1000 H0YLP7\_HUMAN -.ESSLVNGS[pT]FVLQK.K  
 1001 H0YM23\_HUMAN K.EHYPVSSPS[pS]PSPPAQPGGVSR.N  
 1002 H0YMD0\_HUMAN K.LSLEGDH[pS]TPPSAYGSVK.A  
 -  
 1003 H0YMN8\_HUMAN .M#TRDDSSGGWLPLGGSL[pS]SVTVFKVPHQE  
 ENGCADFFIR.G  
 1004 H0YN34\_HUMAN M.AAEEGVA[pS]AA[pS]AGGSWGTAAMGRVLP  
 M#LLVPVPAEAM#GQLGSRAQLR.T  
 1005 H0YNJ9\_HUMAN M.PCSEETPAI[pS]PSKR.A  
 1006 H0YNJ9\_HUMAN M.PCSEETPAISP[pS]KR.A  
 1007 H0YNQ5\_HUMAN R.D[pT]GLPGCQ[pS]SLLRQDLGLGSPAQLSSSGK  
 PG[pT]A[pY][pY].-  
 1008 H14\_HUMAN K.KAPK[pS]PAK.A  
 1009 H15\_HUMAN K.AKKPAGA[pT]PK.K  
 1010 H15\_HUMAN K.KVAK[pS]PK.K  
 1011 H15\_HUMAN M.SETAPAETATPAPVEK[pS]PAKK.K  
 1012 H1X\_HUMAN K.AGGSAAAL[pS]PSK.K  
 1013 H3BLT9\_HUMAN K.ALMDLLAGKG[pS]QG[pS]QAPQALDRTPDAPL  
 GPCSND[pS]R.I  
 1014 H3BM38\_HUMAN K.TTWGDGGEN[pS]PCNVVSK.Q  
 1015 H3BNA1\_HUMAN K.NHSVNEEQEEQEGG[pS]EDEWEQVGPR.N  
 1016 H3BNB2\_HUMAN R.C[pT]EVCGEPSM#GVCRGTTHPAWGQLGCQIC  
 PHH[pS]R.G

1017 H3BNU9\_HUMAN R.GNVVP[pS]PLPTRR.T  
1018 H3BNW0\_HUMAN K.FTDKDQQP[pS]G[pS]EGEDDDAEAALKK.E  
1019 H3BNX2\_HUMAN K.G[pS][pT]SSTSSSSSSSVVDPLSSVLDGTDPLSM  
FAATADPAALAAAM#D[pS][pS]RR.K  
1020 H3BP01\_HUMAN K.LGVSV[pS]PSR.A  
1021 H3BPZ1\_HUMAN R.WLDE[pS]DAEMELR.A  
1022 H3BSM8\_HUMAN K.[pS]PQPILGFSLR.A  
1023 H3BT22\_HUMAN K.IGQQVDREPGDVA[pT]PPR.K  
1024 H3BUF6\_HUMAN R.QGSGRE[pS]PSLASR.E  
1025 H3BUM4\_HUMAN K.DFQDYMEPEEGCQG[pS]PQRR.G  
1026 H3BUV2\_HUMAN -.GR[pS]R[pS]LGPGAGPR.G  
1027 H3BUV9\_HUMAN R.DMPGGFLFEGl[pS]DDEDDFHPNTR.S  
1028 H3BUV9\_HUMAN R.DM#PGGFLFEGl[pS]DDEDDFHPNTR.S  
1029 H7BXM6\_HUMAN K.DIKEE[pS]DEEEEDDEESGRLR.F  
1030 H7BY83\_HUMAN K.EYVSNDAAQ[pS]DDEEKLSQPTD TDGGR.L  
-  
1031 H7BZX1\_HUMAN .RQIHMVHKPDDDD[pT]DM#[pY]N[pT]P[pY][pT]Y  
NAGLYNPPY[pS]AQSHPAAKTQ[pT]YRPL[pS]K.S  
1032 H7C0I1\_HUMAN K.LETSWSQLAGML[pY]KQEK.L  
-  
1033 H7C0J0\_HUMAN .M[pS]V[pT]LYSGEDYPDTAPVIHGVDVINS[pT]L  
VK.V  
1034 H7C0P0\_HUMAN K.AQDLAL[pS]LAQTKASVS[pS]LQEVAM#FLQA[  
pS]VLER.D  
1035 H7C103\_HUMAN K.HVM[pS]RLSSTSSLAITH[pS]V[pS][pT][pS]NVI  
GF[pT]KHV[pY]VQR.L  
1036 H7C125\_HUMAN R.QH[pS]NSNMVIMLIGNK.S  
-  
1037 H7C140\_HUMAN .IQLAGAG[pS]M#GSPGATTGWLLDYKTEK[pY]  
VM#[pT]R.N  
1038 H7C155\_HUMAN R.SA[pS]EPSLHR.A  
1039 H7C1I9\_HUMAN R.HP[pS][pS]IPPPPLTAKDLSSPAARQHCSPPSHA[  
pS]GR.E  
-  
1040 H7C2S0\_HUMAN .ALLEGNSSQGSFEVTP[pS][pS]AGPWANSSLSLH  
GGLSSGLR.L  
1041 H7C474\_HUMAN K.AEGGM#ASATPVAQQSGKDVSPPRVLM#PW[p  
T]PA[pS]V[pS]PSGK.W  
-  
1042 H7C4R5\_HUMAN .WQTQVSQRLATDLLSLMPSL[pT][pS]GEVAHCA  
K.S

|      |              |                                                                      |
|------|--------------|----------------------------------------------------------------------|
| 1043 | H7C504_HUMAN | R.LQEEQDGG[pS][pS]DEDRAGPAPPGASDGVDI<br>QDVK.F                       |
|      |              | -                                                                    |
| 1044 | H7C508_HUMAN | .[pT]AAL[pY]P[pS][pT]DL[pS]GASSSSLPSSPSSSS<br>PNEVM#ALKDVREVK.E      |
|      |              | -                                                                    |
| 1045 | H7C520_HUMAN | .IGTFRPGALV[pS][pS]GNKMMVQMI[pS]DAN[pT]<br>AGNGFM#AMF[pS]AAEPNERGK.K |
| 1046 | H7C5E4_HUMAN | K.EAQSSQATPVQTSQPDSNIVKV[pS]PR.E                                     |
|      |              | -                                                                    |
| 1047 | H7C5K9_HUMAN | .W[pS]L[pS]M#LSTRLTLLM#VATPALMGVG[pT]<br>]LMG[pS]GLR.K               |
|      |              | -                                                                    |
| 1048 | H7C5K9_HUMAN | .VSLSM#LS[pT]RL[pT]LLLM#VA[pT]PALM#GVG<br>[pT]LMGSGLRK.L             |
|      |              | -                                                                    |
| 1049 | H7C5K9_HUMAN | .GSL[pS]ML[pS][pT]RLTLLLMVATPALM#GVGTL<br>MGSGLR.K                   |
|      |              | -                                                                    |
| 1050 | H7C5K9_HUMAN | .ESLSML[pS][pT]RL[pT]LLLMVATPALMGVGT<br>MGSGLR.K                     |
| 1051 | H9KVB4_HUMAN | K.KA[pY]LDPGAVLPR[pS]AA[pT]CGRPVADM#H<br>SAAHGSGEA[pS]AMQ[pS]LIK.Y   |
| 1052 | HAP28_HUMAN  | K.SLD[pS]DE[pS]EDEEDDYQQK.R                                          |
| 1053 | HAP28_HUMAN  | K.[pS]LD[pS]DESEDEEDDYQQK.R                                          |
| 1054 | HAP28_HUMAN  | K.[pS]LDSDE[pS]EDEEDDYQQK.R                                          |
| 1055 | HAP28_HUMAN  | K.KSLD[pS]DE[pS]EDEEDDYQQK.R                                         |
| 1056 | HAP28_HUMAN  | K.SLD[pS]DE[pS]EDEEDDYQQKR.K                                         |
| 1057 | HAP28_HUMAN  | K.[pS]LDSDE[pS]EDEEDDYQQKR.K                                         |
| 1058 | HDAC1_HUMAN  | R.IACEEEF[pS]D[pS]EEEGEGGR.K                                         |
| 1059 | HDAC1_HUMAN  | R.IACEEEF[pS]D[pS]EEEGEGGRK.N                                        |
| 1060 | HDAC1_HUMAN  | R.MLPHAPGVQMQAIPEDAIPEE[pS]GDEDED<br>DKR.I                           |
| 1061 | HDAC1_HUMAN  | R.M#LPHAPGVQMQAIPEDAIPEE[pS]GDEDED<br>DKR.I                          |
| 1062 | HDAC1_HUMAN  | R.MLPHAPGVQM#QAIPEDAIPEE[pS]GDEDED<br>DKR.I                          |
| 1063 | HDAC1_HUMAN  | R.M#LPHAPGVQM#QAIPEDAIPEE[pS]GDEDED<br>PDKR.I                        |
| 1064 | HDAC2_HUMAN  | R.IACDEEF[pS]D[pS]EDEGEGGRR.N                                        |
| 1065 | HDAC2_HUMAN  | R.MLPHAPGVQMQAIPEDAVHED[pS]GDEDED                                    |

|      |             |                                                                                                       |
|------|-------------|-------------------------------------------------------------------------------------------------------|
|      |             | PDKR.I                                                                                                |
| 1066 | HDAC2_HUMAN | R.M#LPHAPGVQMQAIPEDAVHED[pS]GDEDGE<br>DPDKR.I                                                         |
| 1067 | HDAC2_HUMAN | R.M#LPHAPGVQM#QAIPEDAVHED[pS]GDEDGE<br>DPDKR.I                                                        |
| 1068 | HDGF_HUMAN  | R.AGDILLED[pS]PK.R                                                                                    |
| 1069 | HDGF_HUMAN  | R.AGDILLED[pS]PKRPK.E                                                                                 |
| 1070 | HDGF_HUMAN  | R.RAGDILLED[pS]PKRPK.E                                                                                |
| 1071 | HELQ_HUMAN  | R.QAKQIV[pS]SAK.M                                                                                     |
| 1072 | HELQ_HUMAN  | R.QAKQIVS[pS]AK.M                                                                                     |
| 1073 | HIRP3_HUMAN | K.EQREEAAEVA[pS]LDVANIISGSGRPR.R                                                                      |
| 1074 | HIRP3_HUMAN | R.LGS[pT][pS]GEE[pS]DLEREVSD[pS]EAGGGPQ<br>GER.K                                                      |
| 1075 | HMGA1_HUMAN | K.KLEKEEEEEGISQE[pS][pS]EEEEQ.-                                                                       |
| 1076 | HMGA1_HUMAN | K.KLEKEEEEEGI[pS]QE[pS][pS]EEEEQ.-                                                                    |
| 1077 | HMGA1_HUMAN | R.KQPPV[pS]PGTALVGSQKEPSEVP[pT]PK.R                                                                   |
| 1078 | HMGA1_HUMAN | R.KQPPVSPG[pT]ALVGSQKEPSEVPTPK.R                                                                      |
| 1079 | HMGA1_HUMAN | R.KQPPVSPGTALVGSQKEPSEVP[pT]PK.R                                                                      |
| 1080 | HMGA1_HUMAN | R.KQPPVSPG[pT]ALVGSQKEPSEVP[pT]PK.R                                                                   |
| 1081 | HNRH1_HUMAN | K.H[pT]GPNSPDTANDGFVR.L                                                                               |
| 1082 | HNRH1_HUMAN | K.HTGPNSPD[pT]ANDGFVR.L                                                                               |
| 1083 | HNRH1_HUMAN | K.HTGPN[pS]PDTANDGFVR.L                                                                               |
| 1084 | HNRH3_HUMAN | R.MGMGNYSYSGG[pY]GTPDGLGG[pY]GRGGGG[<br>pS]GGYYGQGGM#[pS]GGGWR.G                                      |
| 1085 | HNRL2_HUMAN | R.SK[pS]PLPPEEEAKDEEEDQTLVNLDTYTSDLH<br>FQVSK.D                                                       |
| 1086 | HNRL2_HUMAN | R.SKSPLPPEEEAKDEEEDQ[pT]LVNLDTYTSDLH<br>FQVSK.D                                                       |
| 1087 | HNRL2_HUMAN | R.[pS]KSPLPPEEEAKDEEEDQTLVNLDTYTSDLH<br>FQVSK.D                                                       |
|      |             | -                                                                                                     |
| 1088 | HNRPD_HUMAN | .M#[pS]EEQFGGDGAAAAA[pT]AAVGG[pS]AGE<br>QEGAM#VAA[pT]QGAAAAAG[pS]GAGTGGGTA<br>SGGTEGG[pS]AE[pS]EGAK.I |
| 1089 | HNRPK_HUMAN | R.DYDDM[pS]PR.R                                                                                       |
| 1090 | HNRPK_HUMAN | K.IIPTLEEGQLLP[pS]PTATSQLPLESDAVECLNY<br>QHYK.G                                                       |
| 1091 | HNRPK_HUMAN | R.DYDDM#[pS]PR.R                                                                                      |
| 1092 | HS90B_HUMAN | K.IEDVG[pS]DEEDDSGKDK.K                                                                               |
| 1093 | HS90B_HUMAN | K.IEDVG[pS]DEEDDSGKDKK.K                                                                              |
| 1094 | HUWE1_HUMAN | R.GSGTA[pS]DDEFENLR.I                                                                                 |

|      |              |                                                                                                                                             |
|------|--------------|---------------------------------------------------------------------------------------------------------------------------------------------|
| 1095 | HUWE1_HUMAN  | K.AC[pS]PCSSQSSSSGICTDFWDLVK.L                                                                                                              |
| 1096 | HUWE1_HUMAN  | R.K[pY]P[pY]HLMLQKFLC[pS]GGHNALFE[pT]F<br>NWAL[pS]M#GGK.V                                                                                   |
| 1097 | I2BP2_HUMAN  | K.LEEPPELNRQ[pS]PNPR.R                                                                                                                      |
| 1098 | I2BP2_HUMAN  | R.KP[pS]PEPEGEVGPPK.I                                                                                                                       |
| 1099 | I2BP2_HUMAN  | K.RKP[pS]PEPEGEVGPPK.I                                                                                                                      |
| 1100 | I2BPL_HUMAN  | R.KA[pS]PEPPDSAEGALK.L                                                                                                                      |
| 1101 | I3L1L3_HUMAN | K.ALGGED[pS]ENEEELGDEAMM#ALDQSLASLF<br>AEQK.L                                                                                               |
| 1102 | I3L1Q2_HUMAN | K.GTEPSGGTPQP[pS]RPVSPAGPPEGVPEEAQP<br>PR.L                                                                                                 |
| 1103 | I3L1Q2_HUMAN | K.G[pT]EPSPGGTPQPSRPV[pS]PAGPPEGVPEEA<br>QPPR.L                                                                                             |
| 1104 | I3L1Q2_HUMAN | K.GTEP[pS]PGG[pT]PQPSRPV[pS]PAGPPEGVPEE<br>AQPPR.L                                                                                          |
| 1105 | I3L1Q2_HUMAN | K.G[pT]EPSPGG[pT]PQPSRPV[pS]PAGPPEGVPEE<br>AQPPR.L                                                                                          |
| 1106 | I3L1Q2_HUMAN | K.GTEPSGG[pT]PQPSRPV[pS]PAGPPEGVPEEA<br>QPPR.L                                                                                              |
| 1107 | I3L1Q2_HUMAN | K.GTEP[pS]PGGTPQPSRPV[pS]PAGPPEGVPEEA<br>QPPR.L                                                                                             |
| 1108 | I3L1Q2_HUMAN | K.GTEPSGGTPQPSRPV[pS]PAGPPEGVPEEAQP<br>PR.L                                                                                                 |
| 1109 | I3L2B2_HUMAN | K.ERM#AQVA[pT]GMG[pS]NQITFGRGSSQPMLS<br>TSH[pS]EQEYGK.A                                                                                     |
| 1110 | I3L2J8_HUMAN | R.SGSPRPTEP[pT]DFLMLFEGSPSGK.K                                                                                                              |
| 1111 | I3L2Q9_HUMAN | R.FPNP[pS]QAGIPTAVEQMM#LV[pS]VHMDG[p<br>S]RPVR.V                                                                                            |
| 1112 | I3L2T2_HUMAN | R.[pT]SEQHRQSDGNHTIPASSLHSM#TNFI[pS]G<br>LQRLHGMLEFLRP[pS][pS][pS]NH[pS]VGPM#R.-<br>M.AAGSGGSGGSGGGPGPGGGGGPSGSGSGP<br>GSNGGLG[pS]GGELHPR.T |
| 1113 | I3L2W2_HUMAN | -                                                                                                                                           |
| 1114 | I3L2W2_HUMAN | .MAAGSGGSGG[pS]GGPGPGPGGGGGP[pS]G[p<br>S]G[pS]GPGSNGGLGSGGELHPRTGR.L                                                                        |
| 1115 | I3L445_HUMAN | -.RSAV[pS]SGPR.L                                                                                                                            |
| 1116 | I3L4U6_HUMAN | -.RR[pS]PR.K                                                                                                                                |
| 1117 | I3NI16_HUMAN | R.AMGDYLVGVHTDGGEIQDGAGHQMGGRGG<br>A[pS]G[pS]LR.H                                                                                           |
| 1118 | ICLN_HUMAN   | K.FEEESKEPVADEEEED[pS]DDDVEPITEFR.F                                                                                                         |
| 1119 | ICLN_HUMAN   | K.FEEE[pS]KEPVADEEEEDSDDDVEPITEFR.F                                                                                                         |

1120 IDHC\_HUMAN R.A[pT]DFVVPGPVKVEI[pT]Y[pT]PSDGTQKVTY  
 LVHNFEEGGGVAMGM#[pY]NQDK.S  
 1121 IF\_HUMAN K.[pT]LLAN[pS][pS]PFNVDP[pT]GAM#ATLALTCM  
 #[pY]NKIPVGSEEGYR.S  
 1122 IF2B1\_HUMAN R.QG[pS]PVAAGAPAK.Q  
 1123 IF4B\_HUMAN R.SQSSDTEQQ[pS]PTSGGGK.V  
 1124 IF4B\_HUMAN R.SQSSD[pT]EQQ[pS]PTSGGGK.V  
 1125 IFIX\_HUMAN K.M#SKEQTRPSC[pS]AGA[pS][pT][pS][pT]AMGR  
 [pS]PPPQ[pT][pS][pS][pS]APPN[pT][pS][pS][pT]ES  
 LKPLANR.H  
 1126 IGS10\_HUMAN K.KPEV[pS]M#LA[pT][pT]GL[pS]EATTLVSDWDG  
 QKNTK.K  
 1127 ILF3\_HUMAN K.FN[pY]SGSGGR[pS]GGN[pS]YGGSGASYNPGS  
 HGGYGGGSGGGSSYQGK.Q  
 1128 ILF3\_HUMAN R.DS[pS]KGEDSAEETEAKPAVVAPAPVVEAVST  
 PSAAFPSDATAEQGPILTK.H  
 1129 ILF3\_HUMAN R.DSSKGED[pS]AEETEAKPAVVAPAPVVEAVST  
 PSAAFPSDATAEQGPILTK.H  
 1130 ILF3\_HUMAN R.DSSKGEDSAEE[pT]EAKPAVVAPAPVVEAVST  
 PSAAFPSDATAEQGPILTK.H  
 1131 IMA4\_HUMAN R.NVPQEELED[pS]DVDADFK.A  
 1132 INCE\_HUMAN R.IAQV[pS]PGPR.D  
 1133 INCE\_HUMAN R.[pT]LSPTASATAPTSQGIPTSDEE[pS][pT]PKK.  
 S  
 1134 INVS\_HUMAN K.[pS]DIDINM#ADKYGG[pT]ALHAAALSGHV[pS  
 ][pT]VKLLLENNAQVDA[pT]DVMK.H  
 1135 IPO7\_HUMAN R.A[pY]ACHAEHENDSDDDDEAEDDDETEELG[p  
 S]DEDDIDEDGQEYLEILAK.Q  
 1136 IPO7\_HUMAN R.AYACHAEHEND[pS]DDDDEAEDDDETEELG[p  
 S]DEDDIDEDGQEYLEILAK.Q  
 1137 IPO7\_HUMAN R.AYACHAEHEND[pS]DDDDEAEDDDDE[pT]EEL  
 GSDEDDIDEDGQEYLEILAK.Q  
 1138 IPO7\_HUMAN R.AYACHAEHENDSDDDDEAEDDDDE[pT]EELG[p  
 S]DEDDIDEDGQEYLEILAK.Q  
 1139 IPP2\_HUMAN K.IDEPSTPYHSMMGDDDEDACSD[pT]EATEAMAP  
 DILAR.K  
 1140 IPP2B\_HUMAN R.IQEQE[pS][pS]GEEDSDLSPEER.E  
 1141 IPP2B\_HUMAN K.YRIQEQE[pS][pS]GEEDSDLSPEER.E  
 1142 IRGQ\_HUMAN R.LGAWAGEG[pT]AGGAALGALSFLWPAGGAA  
 A[pT]GGLG[pY]R.A  
 1143 IRS2\_HUMAN -



.MASPPRHGPPGPA[pS]GDGPNLNNNNNNNNHHS  
VRK.C

1144 ISPD\_HUMAN R.ASEM#PQAFLFDVI[pY]EA[pY]QQCSDYDLEFG  
[pT]ECLQLALKYCC[pT]K.A

1145 ITPI2\_HUMAN R.SQ[pS]LPTTLLSPVR.V

1146 IWS1\_HUMAN K.AAVL[pS]D[pS]EDEEKASAK.K

1147 J3KR35\_HUMAN R.LKGQEDSLASAVDAATEQKTCD[pS]D.-  
M.GGRGADAGS[pS]GGTGPTEGYSPPAASTRAA  
AR.A

1148 J3KSI9\_HUMAN R.A[pT]SNVFAMFDQSQIQEFK.E

1149 J3KTJ1\_HUMAN R.AT[pS]NVFAMFDQSQIQEFK.E

1150 J3KTJ1\_HUMAN R.A[pT]SNVFAM#FDQSQIQEFK.E

1151 J3KTJ1\_HUMAN -

1152 J3QKY6\_HUMAN .M#VM#AALSLVAACWGRAAADE[pS]VQLPAAP  
G[pS]SVRAR.E

1153 J3QQM9\_HUMAN -  
.STGLLEHYGQGGNCLEDAAPF[pS]YH[pS]TFLLA  
DR.T

1154 J3QQQ4\_HUMAN -.TKGYM#VVLRLATGFSHPL[pT]QSAVM#GHR.S

1155 J3QRK7\_HUMAN -  
.[pT]TTSPLIPTTTTPARPLLPFSTGPGSPLFQPLSFQ[  
pS]QG[pS]PPK.G

1156 J3QT09\_HUMAN R.GHNEGNQSLISAEPVV[pS]SDEEGPVEHKSSEI  
LK.L

1157 J9JIF5\_HUMAN R.K[pS]SSAAASSSASSSSAILPAGGGGGGGGGGS  
R[pT][pS]M#HHR.N

1158 JUND\_HUMAN R.LAALKDEPQTPDVPSFGE[pS]PPLSPIDMDTQ  
ER.I

1159 JUND\_HUMAN -  
.M#E[pT]PFYGDEAL[pS]GLGGGA[pS]G[pS]GGSF  
ASPGRLFPGAPPTAAAG[pS]M#MKK.D

1160 JUPI2\_HUMAN K.TSDIFG[pS]PVTATSR.L

1161 K1143\_HUMAN R.IQPQPDEDGDH[pS]DKEDEQPQVVVLK.K

1162 K1C15\_HUMAN R.GG[pS]LLAGGGGFGGGSLSGGGSR[pS]I[pS]A  
[pS][pS]ARFV[pS][pS]G[pS]GGGYGGGM#R.V

1163 K1C17\_HUMAN R.L[pS]GGLGAGSCR.L

1164 K1C17\_HUMAN R.TSCR[pS]GGLGAGSCR.L

1165 K1C17\_HUMAN R.QFTSSS[pS]IKGSSGLGGGSSR.T

1166 K1C17\_HUMAN R.QFTSS[pS]SIKGSSGLGGGSSR.T

1167 K22O\_HUMAN K.GSSSSSSSSG[pY]GVSSG[pS]G[pS]GYGGV[pS]  
[pS]G[pS][pT]GGRG[pS][pS]G[pS]YQ[pS][pS]SSGS

R.L

1168 K22O\_HUMAN R.GVFGGVSGSGSGGYKGGSSS[pS][pS][pS]SG[pY]GVSGSGSGYGGVSSGSTGGR.G

1169 K22O\_HUMAN R.GVFGGVSGSGSGGYKGGSSSSS[pS][pS]G[pY]GV[pS]GGSGSGYGGVSSGSTGGR.G

1170 K2C1B\_HUMAN R.MSGELQSHVSIQNSQVSVNGGAGGGGSYG[pS]GG[pY]GGGSGGG[pY]GGGR.S

1171 K2C8\_HUMAN R.ISSS[pS]FSR.V

1172 K2C8\_HUMAN R.[pS]YTSGPGSR.I

1173 K2C8\_HUMAN R.LE[pS]GMQNM#[pS]IH[pT]K[pT]TSGYAGGLSSA[pY]GGLTSPGLSYSLGSSFGSGAG[pS][pS][pS]F[pS]R.T

1174 K4DI97\_HUMAN R.M#PKSEGG[pS]GGGAAGGGAGGAGAGAGCGSGGSSVGVR.V

1175 K7EIH3\_HUMAN K.DVSGFSDPYCLLGIEQGVGVPGG[pS]PGSR.H

1176 K7EIJ2\_HUMAN K.DELDSLITAITTNGAHP[pS]K.C

1177 K7EJ94\_HUMAN -.MSSTAGHTAGSGPM#PAPSAGSAST[pT]AR.T

1178 K7EJ94\_HUMAN -.M#SSTAGHTAGSGPMPAPSAGSAST[pT]AR.T

-

1179 K7EJ94\_HUMAN .ASSTAGHTAGSGPM#PAPSAGSAS[pT]TARTSAPTAGR.T

1180 K7EJV9\_HUMAN K.IR[pT]SPTFR.R

-

1181 K7EK86\_HUMAN .GG[pS][pS]QG[pT]ACAGTQPGAQPGAQPGASPSPSQPPADQ[pS]PH[pT]LRK.V

-

1182 K7EK86\_HUMAN .EG[pS][pS]QGTACAGTQPGAQPGAQPGASPSPSQPPADQSPHTLRKVSK.K

-

1183 K7EKC2\_HUMAN .M#ADQDPAGI[pS]PLQQM#VASGTGAVVTSLFM#TPLDVVKVRLQ[pS]QRP[pS]M#[pS]VP[pS][pS]LQ[pS][pT]GK.C

1184 K7ELC1\_HUMAN R.[pS]R[pS]GA[pT]LSGPM#TM#SCRSCGPAPPAPSSSISAPR.A

-

1185 K7ELL4\_HUMAN .VLKEEGTEAM#GGTGSSPGVGATEAPET[pT]IAAGVRVATVTGAR.A

-

1186 K7ELL4\_HUMAN .VLKEEGTEAM#GGTGSSPGVGATEAPET[pT]IAAGVRVVA[pT]VTGAR.A

1187 K7EMM4\_HUMAN -

.MM#SLGGRHAGLVGG[pS]HPEDGLAG[pS][pT][pS]LMHNHAALP[pS]QPG[pT]LPDL[pS]RPPD[pS]YSGLGR.A

1188 K7EN91\_HUMAN R.LASVLLYSDYGIGEVPEPLDVPLPS[pT]IRPAS PVAGSPK.Q

1189 K7ENR9\_HUMAN K.LTTTGQVT[pS]PVKGASFVTSTNPR.K

1190 K7EPI1\_HUMAN R.ATCLEGPQSESLKSRTLAGE[pY]HSSHLNPS[pT]LGGQEM#[pT]K.R

1191 K7EQN7\_HUMAN R.[pS]ASPAVQHECIPQAILGMDVLCQAK[pS]GM GK.T

1192 K7ERU2\_HUMAN R.QADPQPQAWPPPD[pS]PVRVDTVR.V

-

1193 K7ERZ7\_HUMAN .NLAGSTSLMHNHAALPSQPGTLPDLRPPD[pS]Y[pS]GLGRAGATAAASEIKR.E

1194 KAP0\_HUMAN R.TDSREDEI[pS]PPPPNPVVK.G

1195 KAP2\_HUMAN R.RV[pS]VCAETYNPDEEEEDTDPR.V

1196 KAP2\_HUMAN R.VADAKGD[pS]E[pS]EEDEDELEVPVPSR.F

1197 KAP2\_HUMAN R.RVSVCAE[pT]YNPDEEEEDTDPR.V

1198 KCD12\_HUMAN R.SP[pS]GGAAGPLLTPSQSLDGSRR.S

-

1199 KCNH4\_HUMAN .M#PVM#KGLLAPQNTFLD[pT]IATRFDG[pT]H[pS]NFLLANAQQ[pT]R.G

1200 KDM2A\_HUMAN R.TPQRGDEEGLGGEEEEEEEEEEEDD[pS]AEEGGAAR.L

1201 KHDR1\_HUMAN R.SG[pS]MDPSGAHPSVR.Q

1202 KIF3C\_HUMAN K.ENPE[pT]GVYIK.D

1203 KIF3C\_HUMAN K.AGPN[pT]AGGAATPSSGGGGGGGGSGGGAGGERPKEASKINL[pS]L[pS]ALGNVIAALAGNR.S

1204 KLDC4\_HUMAN K.QVLTAPGSAGQPR[pS]EDED[pS]LEEAGSPAPGPCPR.S

1205 KLF12\_HUMAN K.ART[pS]P[pT]AV[pS]SSPVSM#TASASSPSSTSTSSSSSR.L

1206 KPCI\_HUMAN K.QVVPFKNISGEFGLDNFDSQFTNEPVQL[pT]PDDDDIVR.K

1207 KTN1\_HUMAN K.KVEPVPVTKQP[pT]PPSEAAASK.K

1208 LAP2A\_HUMAN R.[pS]STPLPTISSAENTR.Q

1209 LAP2A\_HUMAN K.GPPDFS[pS]DEEREPTPVLGSGAAAAGR.S

1210 LAP2A\_HUMAN K.GPPDFSDEEREPT[pT]PVLGSGAAAAGR.S

1211 LAP2A\_HUMAN K.GPPDFS[pS][pS]DEEREPTPVLGSGAAAAGR.S

1212 LAP2A\_HUMAN K.GPPDFS[pS]DEEREPT[pT]PVLGSGAAAAGR.S

1213 LAP2A\_HUMAN R.DYVN[pS]LLVQGGVGSPLPGTSNSM#PPLDVEN

IQKR.I

1214 LAP2A\_HUMAN R.NRPPLPAGTNSKGPPDFSSDEEREP[pT]PVLGS  
GAAAAGR.S

1215 LAP2B\_HUMAN R.SS[pT]PLPTISSSAENTR.Q

1216 LARP4\_HUMAN K.DGLNQTIPV[pS]PPSTTKPSR.A

1217 LARP4\_HUMAN R.ASTA[pS]PCNNNINAATAVALQEPR.K

1218 LAT1\_HUMAN K.[pS]ADGSAPAGEGEGVTLQR.N

1219 LEO1\_HUMAN K.KYVI[pS]DEEEEDDD.-

1220 LEXM\_HUMAN K.G[pS]GAKACQM#IM#GSWNPVGVGRYLN[pT]  
WLME[pT]K.D

1221 LIMA1\_HUMAN K.TV[pS]PPIR.K

1222 LIMA1\_HUMAN K.TV[pS]PPIRK.G

1223 LIMA1\_HUMAN R.ASSLSE[pS]SPPK.A

1224 LIMA1\_HUMAN R.ASSLSES[pS]PPK.A

1225 LIMA1\_HUMAN R.ETPH[pS]PGVEDAPIAK.V

1226 LIMA1\_HUMAN K.SEVQQPVHPKPL[pS]PDSR.A

1227 LMNA\_HUMAN R.LRL[pS]PSPTSQR.S

1228 LMNA\_HUMAN R.LRL[pS]PSPT[pS]QR.S

1229 LMNA\_HUMAN R.ASSH[pS][pS]QTQGGGSVTK.K

1230 LMNB1\_HUMAN K.LSP[pS]PSSR.V

1231 LMNB1\_HUMAN R.LKL[pS]P[pS]PSSR.V

1232 LMNB1\_HUMAN R.AGGPTTPLSP[pT]R.L

1233 LMNB1\_HUMAN K.TTIPEEEEEEEAAGVVVEELFHQQG[pT]PR.A

1234 LMNB1\_HUMAN R.LKL[pS]PSPSSR.V

1235 LMNB1\_HUMAN R.AGGPTTPL[pS]PTR.L

1236 LMNB1\_HUMAN R.AGGPT[pT]PL[pS]PTR.L

1237 LMNB1\_HUMAN R.VTVSRA[pS]SSR.S

1238 LONM\_HUMAN R.IA[pY][pT]FARAFLM#QHAPANDYLVTSIHHLH  
VPEGATPK.D

1239 LRC47\_HUMAN K.YTLENKEEGSL[pS]DTEADAVSGQLPDPTNPS  
AGK.D

1240 LRP2\_HUMAN R.SGADLNM#DIGVSGFGPETAIDR[pS]M#AM#SE  
DFVMEM#GK.Q

1241 LRRF1\_HUMAN K.SEDADRCTLPEHE[pS]PSQDISDACEAESTER.C

1242 LRRF1\_HUMAN K.SEDADRCTLPEHESP[pS]QDISDACEAESTER.C

1243 LS14A\_HUMAN R.SPVS[pT]RPLPSASQK.A

1244 LS14A\_HUMAN R.[pS]PVSTRPLPSASQK.A

1245 LSG1\_HUMAN K.TFFHQENVRAL[pT]KGVQAVM#G[pY]KPG[pS]  
GVVTASTASSENGAGKPWK.K

1246 LUZP1\_HUMAN R.EKPD[pS]DDDLDIASLVTA.K.L

1247 M0QX38\_HUMAN K.RLLDAGAD[pT]NAQDH[pS]GR[pT]PLH[pT]AV[

pT]ADAQGVFQILIR.N  
 1248 M0QXD0\_HUMAN R.LLTPNPGYG[pT]QAGPSPAPP[pT]PPEEEDLRR.  
 R  
 1249 M0QY97\_HUMAN R.AAKPGPAEAPSPTASPSGDA[pS]PPATAPYDPR.  
 V  
 1250 M0QY97\_HUMAN R.AAKPGPAEAP[pS]PTASPSGDASPPATAPYDPR.  
 V  
 1251 M0QY97\_HUMAN R.AAKPGPAEAPSP[pT]ASPSGDASPPATAPYDPR.  
 V  
 1252 M0QYB0\_HUMAN R.LGAPENSGIS[pT]LER.G  
 -  
 1253 M0QZE8\_HUMAN .TQM#GM#AAAVLAM#[pT]LAPT VSGTTSKCSSR  
 R.W  
 -  
 1254 M0R0D6\_HUMAN .M#WPTGHGDIISGHGPLV[pS][pT]TAAFAAAISM  
 VVAM#AVYTSE R.W  
 1255 M0R0F9\_HUMAN R.AP[pS]DSSLGTPSDGRPELR.G  
 1256 M0R1B6\_HUMAN R.LNQPG[pT]PTR.T  
 1257 MA13P\_HUMAN K.EKAQAIATMGG[pT][pT]LM#A[pS]AHSWAKS  
 SSFSCPE.-  
 1258 MA7D1\_HUMAN R.SAV[pT]LPR.N  
 1259 MA7D1\_HUMAN R.LSAS[pT]A[pS]ELSPK.S  
 1260 MA7D1\_HUMAN K.QLPLEPESPSGQVGPRPAPPQEE[pS]PSSEAK.S  
 1261 MA7D1\_HUMAN K.QLPLEPE[pS]PSGQVGPRPAPPQEESP[pS]SEAK  
 .S  
 1262 MAK16\_HUMAN K.ALEQQEAE[pS]DS[pS]DTEEKDDDDDDDEEDVG  
 KR.E  
 1263 MAP1B\_HUMAN R.GAE[pS]PFEEK.S  
 1264 MAP1B\_HUMAN K.VQSLEGEKL[pS]PK.S  
 1265 MAP1B\_HUMAN R.TTKSP[pS]DSGYSYETIGK.T  
 1266 MAP1B\_HUMAN R.ES[pS]PLYSPTFSDSTSAVK.E  
 1267 MAP1B\_HUMAN K.AAEAGGAEQYGFLT[pT]PTK.Q  
 1268 MAP1B\_HUMAN K.QG[pS]PDQV[pS]PVSEMTSTSLYQDKQEGK.S  
 1269 MAP1B\_HUMAN K.VSAEAEVAPV[pS]PEVTQEVVEEH CASPEDK.T  
 1270 MAP1B\_HUMAN K.VLSPLR[pS]PPLIGSESAYESFLSADDKASGR.G  
 1271 MAP1B\_HUMAN K.DSISAVSSEK VSPSKSP[pS]L[pS]P[pS]PP[pS]PL  
 EK.T  
 1272 MAP1B\_HUMAN K.SGKQG[pS]PDQV[pS]PVSEMTSTSLYQDKQEG  
 K.S  
 1273 MAP1B\_HUMAN K.VSAEAEVAPV[pS]PEV[pT]QEVVEEH CASPED  
 K.T

1274 MAP1B\_HUMAN K.TELSP[pS]FINPNPLEWFASEEPTTEESEKPLTQS  
GGAPPPPGGK.Q  
1275 MAP1B\_HUMAN R.TTK[pS]PSDSGYSYETIGK.T  
1276 MAP1B\_HUMAN K.TTR[pT]PEEGGYSYDISEK.T  
1277 MAP1B\_HUMAN R.ES[pS]PL[pY]SPTFSDSTSAVK.E  
1278 MAP1B\_HUMAN R.ASVSPMDEPVPDSE[pS]PIEK.V  
1279 MAP1B\_HUMAN K.TLEVVSQSVTG[pS]AGHTP[pY]YQSPTDEK.  
S  
1280 MAP1B\_HUMAN K.VSAEAEVAPVSPEVTQEVVEEHCA[pS]PEDK.T  
1281 MAP1B\_HUMAN K.TEL[pS]PSFINPNPLEWFASEEPTTEESEKPLTQS  
GGAPPPPGGK.Q  
1282 MAP1B\_HUMAN R.E[pS]SPLYSPYSDSTSAVK.E  
1283 MAP1B\_HUMAN R.ES[pS]PLY[pS]PTFSDSTSAVK.E  
1284 MAP1B\_HUMAN K.[pT]ELSPSFINPNPLEWFASEEPTTEESEKPLTQS  
GGAPPPPGGK.Q  
1285 MAP4\_HUMAN K.RA[pS]PSKPASAPASR.S  
1286 MAP4\_HUMAN K.DM#SPLSETEMALGKDV[pT]PPPETEVLIIK.N  
1287 MARCS\_HUMAN K.AEDGATP[pS]PSNETPK.K  
1288 MARCS\_HUMAN K.AEDGATSPSNE[pT]PK.K  
1289 MARCS\_HUMAN K.AEDGATSPSNE[pT]PKK.K  
1290 MARCS\_HUMAN K.AEDGATPSP[pS]NETPK.K  
1291 MARCS\_HUMAN K.AEDGATSPSNE[pT]PKKK.K  
1292 MARCS\_HUMAN K.AEDGATP[pS]PSNETPKKK.K  
1293 MARF1\_HUMAN K.IQLSSVPKVSACCAHCPNEPST[pS]PMRFGGGGG  
GSGGTSSLIHPGALLDSQSTR.T  
R.VP[pS]GAM#KM#PTM#VPLSLLSVPQLSGAGG  
1294 MAZ\_HUMAN GGGEAGAGGGAAAVAAGGVV[pT][pT][pT]A[pS]  
GK.R  
R.VPSGAMKMPTM#VPLSLLSVPQLSGAGGGGG  
1295 MAZ\_HUMAN EAGAGGGAAAVAAGGVVT[pT][pT]A[pS]GK.R  
K.ALGGED[pS]ENEEELGDEAMMALDQSLASLF  
1296 MBB1A\_HUMAN AEQK.L  
R.GNDPLTS[pS]PGR.S  
1297 MCM2\_HUMAN R.GLLYD[pS]DEEDEERPAR.K  
1298 MCM2\_HUMAN R.RGLLYD[pS]DEEDEERPAR.K  
1299 MCM2\_HUMAN R.AIPELDAYEAEGALDDEDVEELTA[pS]QR.E  
1300 MCM2\_HUMAN R.RTDALTS[pS]PGRDLPPFEDESEGLLGTEGGLEE  
EEDGEELIGDGM#ER.D  
1301 MCM2\_HUMAN R.RTDALT[pS]SPGRDLPPFEDESEGLLGTEGGLEE  
EEDGEELIGDGM#ER.D  
1302 MCM2\_HUMAN R.CTVIAAANPIGGRYDPSL[pT]F[pS]ENVDL[pT]E  
1303 MCM2\_HUMAN

PIISR.F  
 1304 MCM2\_HUMAN R.RTDALTS[pS]PGRDLPPFEDESEGLLGTEGPLEE  
 EEDGEELIGDGMER.D  
 1305 MCM2\_HUMAN R.RGNDPLTS[pS]PGR.S  
 1306 MCM2\_HUMAN R.RTDAL[pT]SSPGRDLPPFEDESEGLLGTEGPLEE  
 EEDGEELIGDGM#ER.D  
 1307 MCM2\_HUMAN R.RTDALT[pS]SPGRDLPPFEDE[pS]EGLLGTEGPLEE  
 EEEEDGEELIGDGMER.D  
 1308 MCM3\_HUMAN R.SEDE[pS]ETEDEEEKSQEDQEQR.K  
 1309 MCM3\_HUMAN R.[pS]EDESE[pT]EDEEEKSQEDQEQR.K  
 1310 MCM3\_HUMAN K.DGDSYDPYDF[pS]DTEEEMPQVHTPK.T  
 1311 MCM3\_HUMAN K.DGDSYDPYDFSD[pT]JEEEM#PQVHTPK.T  
 1312 MCM3\_HUMAN K.DGDSYDPYDF[pS]DTEEEMPQVH[pT]PK.T  
 1313 MCM3\_HUMAN K.DGDSYDPYDF[pS]DTEEEM#PQVH[pT]PK.T  
 1314 MCM3\_HUMAN K.DGDSYDPYDF[pS]DTEEEM#PQVHTPK.T  
 1315 MCM3\_HUMAN K.DGDSYDPYDF[pS]D[pT]JEEEMPQVH[pT]PK.T  
 1316 MCM3\_HUMAN K.DGDSYDP[pY]DF[pS]DTEEEM#PQVH[pT]PK.T  
 1317 MDC1\_HUMAN R.SQTT[pT]JERDSDTDVEEEEELPVENR.E  
 1318 MDC1\_HUMAN R.SQTTTERD[pS]D[pT]DVEEEEELPVENR.E  
 1319 MDC1\_HUMAN R.ESEDSETQPFDTHTLEAYGPCL[pS]PPR.A  
 1320 MDC1\_HUMAN R.LLLAED[pS]EEEVDFLSER.R  
 1321 MDC1\_HUMAN R.SQTT[pT]JERDSD[pT]DVEEEEELPVENR.E  
 1322 MDC1\_HUMAN R.SQTT[pT]JERD[pS]DTDVEEEEELPVENR.E  
 1323 MDC1\_HUMAN R.AQPFQFID[pS]DTDAEEERIPATPVVIPMK.K  
 1324 MECP2\_HUMAN K.LLVKM#PFQ[pT][pS]PGGKAEGGGATTSTQVM  
 #VIK.R  
 1325 MEF2A\_HUMAN R.ASPNLIGA[pT]GANS LGKVM#P[pT]K[pS]PPPP  
 GGGNLGM#N[pS]R.K  
 1326 MEP50\_HUMAN R.KE[pT]PPPLVPPAAR.E  
 1327 MEPCE\_HUMAN R.CAPSAG[pS]PAAAVGRE[pS]PGAAATSSSGPQ  
 AQQHR.G  
 1328 MFAP1\_HUMAN K.IVEPEVVGE[pS]D[pS]EVEGD AWR.M  
 1329 MFAP1\_HUMAN R.SLAALDALN[pT]DDENDEEEYEAWK.V  
 1330 MFAP1\_HUMAN R.MERED[pS][pS]EEEEEEIDDEEIER.R  
 1331 MFAP1\_HUMAN R.M#ERED[pS][pS]EEEEEEIDDEEIER.R  
 1332 MFAP1\_HUMAN K.IVEPEVVGE[pS]DSEVEGD AWR.M  
 1333 MFAP1\_HUMAN R.KIVEPEVVGE[pS]DSEVEGD AWR.M  
 1334 MGAP\_HUMAN R.IVNV[pT][pS]LA[pT]EGGLVDM#GGSKYPHEVP  
 DSKPSDHLK.D  
 1335 MGRN1\_HUMAN R.[pY]PPK[pS]GNYFA[pS]HFFM#GGEK.F  
 1336 MK01\_HUMAN R.VADPDHDHTGFLTE[pY]VATR.W

1337 MKS1\_HUMAN R.TETTGTV[pT]FRLHCLQQSR.A  
1338 MLF2\_HUMAN R.LAIQGPED[pS]PSR.Q  
1339 MORC2\_HUMAN R.SVAV[pS]DEEEVEEEAER.R  
1340 MPP8\_HUMAN R.GAEAFGD[pS]EEDGEDVFEVEK.I  
1341 MSH4\_HUMAN K.GLTEEKNYGLKAAEVS[pS]LPP[pS]IVLDAK.E  
R.[pT]GGFLG[pT][pT][pS]PGPMAEL[pY]GAANQD  
1342 MSI1H\_HUMAN [pS]GV[pS][pS]YI[pS]AA[pS]PAPSTGFGHSLGGPL  
IATAF[pT]NGYH.-  
1343 MTMR5\_HUMAN R.ACCRDYQRLGLGTL[pS]S[pS]L[pS]R.A  
-  
1344 MTOR\_HUMAN .MLG[pT]GPAAA[pT][pT]AATTSSNVSVLQQFAS  
GLK[pS]R.N  
1345 MTUS2\_HUMAN R.GQIPGGGEGPQK[pT]LPDHAVPAAFPAP[pT]D[p  
S]TSEGKSVR.H  
1346 MUC12\_HUMAN R.NALKDEGASAGW[pS]VM#FAGE[pS]VVVLVH  
LWM[pT]GARVK.N  
1347 MUC16\_HUMAN K.I[pT][pS]PM#K[pT]FAD[pS]TASKENAPVSMTP  
AETTVD[pS]H[pT]PGR.T  
1348 MUC16\_HUMAN K.LH[pS][pS]VSIHSQPSGHTPPKVTGSMM#EDAI  
VSTS[pT]PG[pS]PE[pT]K.N  
1349 MUC16\_HUMAN K.TTDM#LHKSSSEPVTN[pS]PANL[pS][pS][pT][pS]  
VEILA[pT]SEVTTDTEKTHPSSNR.T  
1350 MUC19\_HUMAN R.L[pS]VIG[pS]G[pT][pT]G[pT][pS][pS]GG[pS]GA[  
pT]R[pS][pS]GGGM#G[pT][pT]GQ[pS][pT]AR.S  
1351 MUC19\_HUMAN R.LSVIGSGT[pT]GTSSGGSGATRSSGGGM#GTTG  
QSTAR.S  
1352 MUC19\_HUMAN K.VTGNYGQSSEIPG[pT]IK[pS][pS][pS]DVSGTM#  
GQSDTTSGPSVAVTR.T  
1353 MUC19\_HUMAN R.I[pT][pS]GGSYTATTRAAPGTTLAPGSSN[pT]G  
A[pT]A[pS]LGG[pS]AM#[pT]RGR.I  
1354 MUC19\_HUMAN K.GLG[pT]IRP[pS]VVGLE[pT][pT]ELSAEGSGTTG  
PPIVGETTVPSAGVTVTSGY[pS]DR.V  
1355 MUC19\_HUMAN K.T[pT]APGPPTTASTGVK.E  
1356 MUC19\_HUMAN R.SEAPGEATTLTGDRSS[pT]G[pS]ESRTATTGVA  
PGTTVAPGSSK.T  
1357 MUC19\_HUMAN R.VTPGSSNSEAT[pT][pS]VEESRITRAEVITEATT  
FSGGSGATR.A  
1358 MUC19\_HUMAN K.[pT]GPPVVKAQ[pT][pT]GP[pS]AGVTVTSGQSA  
RM#TGASGPSVGVGT[pT]GPA[pS]K.G  
1359 MUC19\_HUMAN R.AGTPRVSETPAVGGGSTPGEAGPGATVSGST  
GVSAGSITASPGA[pS]ATSSESSK.S



1360 MUC19\_HUMAN R.[pT]IFK[pT]VGI[pT][pS]APGRQAG[pT][pS]VVA  
 P[pS]TTVAPGSFSTAAT[pT][pS]PGA[pS]GM#[pT]  
 GVR.T  
 M.MMCAA[pT]A[pS]PAAA[pS][pS]GLGGDGFYP  
 1361 MYCB2\_HUMAN AA[pT]F[pS][pS]SPAPGALFM#PVPDGSVAAAGL  
 GLGLPAAD[pS]R.G  
 R.NDSASQP[pS]HQ[pS]DAGKQGLGPPSTPIAVHA  
 1362 MYCD\_HUMAN AVK.S  
 R.QLHLEGA[pS]LELSDDDTESKTSVDNETQPPQS  
 1363 MYH10\_HUMAN E.-  
 R.QLHLEGASLEL[pS]DDDTESKTSVDNETQPPQS  
 1364 MYH10\_HUMAN E.-  
 K.GAGDG[pS]DEEVDGKADGAEAKPAE.-  
 1365 MYH9\_HUMAN R.KGAGDG[pS]DEEVDGKADGAEAKPAE.-  
 1366 MYH9\_HUMAN R.EDEGR[pY]TIKV[pT]NPVGEDVA[pS]IFLQVV  
 1367 MYPC2\_HUMAN VPDPEAVR.I  
 R.KGPQ[pT]KK.S  
 1368 NACAM\_HUMAN K.LVP[pS]QEETKLSVEESEAAAGDGVDTK.V  
 1369 NASP\_HUMAN R.KPEEE[pS]PRKDDAK.K  
 1370 NASP\_HUMAN -  
 .M#A[pS]EKPGPGGLEPQPVGLIAVGAAGGGGG  
 1371 NBEA\_HUMAN GSGGGGTGGSGM#GELRGASGSG[pS]VMLPAG  
 MINP[pS]VPIR.N  
 R.SQEPSRSP[pT]PQGPPFGG[pS]RTPSTSDM#AE  
 1372 NCK5L\_HUMAN EGR.V  
 R.LHL[pS]EDVAGA[pT]FM#AAGSSAPELFT[pS]V  
 1373 NCKX3\_HUMAN IGVFI[pT]K.G  
 R.DHVEVCPDAGVIIIEEL[pS]QRIALTGGAALVAD  
 1374 NDUF7\_HUMAN [pY]GHDG[pT]K.T  
 R.IK[pS]MFLQM#G[pT][pT]AGPSGEAGGGAGLA  
 1375 NEB2\_HUMAN EAPRASER.G  
 K.LVTSGAESGNLNT[pS]PSSNQTR.N  
 1376 NEDD1\_HUMAN K.LGVADIIDCVVL[pT]SSPEATETSQQQLQR.V  
 1377 NF2IP\_HUMAN R.EALAEAALE[pS]PRPALVR.S  
 1378 NHRF1\_HUMAN K.AAPEAS[pS]PPA[pS]PLQHLLPGK.A  
 1379 NIBA2\_HUMAN R.DSMVMHNSDPNLHLLAEGAPIDWGEEYSNSG  
 1380 NIBL1\_HUMAN GGGSPSPS[pT]PESATLSEK.R  
 R.SM#GTGDTPGLEVPS[pS]PLRK.A  
 1381 NIPA\_HUMAN R.SQDATFSPGSEQA EK[pS]PGPIVSR.T  
 1382 NIPA\_HUMAN R.SQDATF[pS]PGSEQA EK[pS]PGPIVSR.T  
 1383 NIPA\_HUMAN R.SM#GTGDTPGLEVPS[pS]PLR.K  
 1384 NIPA\_HUMAN

1385 NIPA\_HUMAN R.SWDSSSPVDRPEPEAA[pS]PTTR.T  
1386 NIPA\_HUMAN R.SWDSS[pS]PVDRPEPEAA[pS]PTTR.T  
1387 NKD1\_HUMAN R.EDITSLLH[pT]IYEVVD[pS][pS]VNHSPTSSKM#  
LRVK.L  
1388 NKX26\_HUMAN R.GSEVHNAGGGGGDRKLDG[pS]EPPGGPCEAV  
LEM#DAER.M  
1389 NMD3\_HUMAN R.DSAIPVESD[pT]DDEGAPR.I  
1390 NMD3\_HUMAN R.DSAIPVE[pS]DTDDEGAPR.I  
1391 NMDE2\_HUMAN R.FMDG[pS]P[pY]AHMFEM[pS]AGE[pS][pT]FAN  
NKSSVP[pT]AGHHHHNNPGGGYM#L[pS]K[pS]L  
YPDR.V  
1392 NOLC1\_HUMAN R.GGSISVQVNSIKFD[pS]E.-  
1393 NOLC1\_HUMAN K.RAS[pS]PFR.R  
1394 NOLC1\_HUMAN K.GKG[pS]PRPQAPK.A  
1395 NOTC2\_HUMAN R.GGS[pS]DLSDEDEDAEDSSANIITDLVYQGASL  
QAQTDR.T  
1396 NP1L4\_HUMAN R.EFITGDVEPTDAE[pS]EWHSENEEEEEK.L  
1397 NP1L4\_HUMAN R.EFITGDVEPTDAESEWH[pS]ENEEEEK.L  
1398 NP1L4\_HUMAN R.EFITGDVEPTDAE[pS]EWHSENEEEEEKLAGDM  
K.S  
1399 NP1L4\_HUMAN R.EFITGDVEPTDAESEWH[pS]ENEEEEKLAGDM  
K.S  
1400 NP1L4\_HUMAN R.EFITGDVEP[pT]DAESEWHSENEEEEEKLAGDM  
K.S  
1401 NP1L4\_HUMAN R.EFI[pT]GDVEPTDAESEWHSENEEEEEKLAGDM  
K.S  
1402 NP1L4\_HUMAN R.EFITGDVEPTDAE[pS]EWHSENEEEEEKLAGDM  
#K.S  
1403 NPM\_HUMAN K.SIRD[pT]PAKNAQK.S  
1404 NPM\_HUMAN K.[pS]IRDTPAKNAQK.S  
1405 NPM\_HUMAN K.CG[pS]GPVHISGQHLVAVEEDAEESEDEEEEDV  
K.L  
-  
1406 NPTN\_HUMAN .M#[pS]G[pS][pS]LPSALALSLLLVSGLLPGPAA  
QNAGFVKSPMSE[pT]K.L  
1407 NSUN2\_HUMAN R.AGEPN[pS]PDAEEANSPDVTAGCDPAGVHPPR.  
-  
1408 NSUN2\_HUMAN R.AGEPNSPDAEEAN[pS]PDVTAGCDPAGVHPPR.  
-  
1409 NSUN2\_HUMAN R.AGEPN[pS]PDAEEAN[pS]PDVTAGCDPAGVHP  
PR.-

1410 NSUN2\_HUMAN R.AGEPN[pS]PDAEEANSPDV[pT]AGCDPAGVHP  
PR.-  
1411 NTNG1\_HUMAN K.LRCEEAG[pS]CG[pS]DSGQGAPPHGSPALLLLT  
TLLGTA[pS]PLVF.-  
1412 NUCKS\_HUMAN K.ATVTP[pS]PVK GK.G  
1413 NUCKS\_HUMAN R.LKATVTP[pS]PVK GK.G  
1414 NUCKS\_HUMAN K.TPSPKEEDEEPE[pS]PPEKK.T  
1415 NUCKS\_HUMAN K.VVDYSQFQE[pS]DDADEDYGR.D  
1416 NUCKS\_HUMAN R.KVVDYSQFQE[pS]DDADEDYGR.D  
1417 NUCKS\_HUMAN K.[pT]STSPPEK[pS]GDEG[pS]EDEAP[pS]GED.-  
1418 NUCKS\_HUMAN K.TST[pS]PPPEK[pS]GDEG[pS]EDEAP[pS]GED.-  
1419 NUCKS\_HUMAN K.VVDYSQFQE[pS]DDADEDYGRDSGPPTK.K  
1420 NUCKS\_HUMAN K.VVDYSQFQE[pS]DDADEDYGRDSGPPTKK.I  
1421 NUCKS\_HUMAN R.KVVDYSQFQE[pS]DDADEDYGRDSGPPTK.K  
1422 NUCKS\_HUMAN R.LKATV[pT]PSPVK.G  
1423 NUCKS\_HUMAN K.ATV[pT]P[pS]PVK GK.G  
1424 NUCL\_HUMAN K.VVV[pS]PTKK.V  
1425 NUCL\_HUMAN K.ALVA[pT]PGKK.G  
1426 NUCL\_HUMAN K.MAPPPKEVEED[pS]EDEEM[pS]EDEEDDS[pS]G  
EEVVIPQKK.G  
1427 NUCL\_HUMAN K.MAPPPKEVEED[pS]EDEEM[pS]EDEEDD[pS]SG  
EEVVIPQKK.G  
1428 NUF2\_HUMAN K.IVD[pS]PEK LK.N  
1429 NUF2\_HUMAN K.GADNDG[pS]G[pS]ESGYTTPK.K  
1430 NUF2\_HUMAN K.DYEIESQNPLA[pS]PTNTLLGSAK.E  
1431 NUF2\_HUMAN K.DYEIESQNPLASPTNTLLG[pS]AK.E  
1432 O2AG2\_HUMAN R.ENTISFGGCALQM#FLALTMG[pS]AEDLLAF  
MA[pY]DR.Y  
1433 O2AG2\_HUMAN R.REN[pT]I[pS]FGGCALQM#FLAL[pT]MG[pS]AE  
DLLLAFM#A[pY]DR.Y  
1434 O56A5\_HUMAN R.[pS]ISFPACFLQVFIMN[pS]FL[pT]M#E[pS]C[pT]  
FM#IMAYDR.Y  
1435 O5AP2\_HUMAN K.IDLCLHTPMYFFLSSLSFVDA[pS]YSSSVTPK.M  
-  
1436 OLIG2\_HUMAN .M#DSDASLV[pS][pS]RP[pS][pS]PEPDDLFLPAR[p  
S]KG[pS][pS]GSAFTGGTVSSSTPSCPELSAELR  
.G  
1437 OR8H3\_HUMAN R.YAAIC SPLH[pY]TVIM#PKRLCLALITGPYVIGF  
M#DSFVN VVSM[pS]R.L  
1438 ORC2\_HUMAN R.VVSAPVGKE[pT]PSKR.M  
1439 OS9\_HUMAN R.VDEPLSC[pS][pY]VLTIRTPR.L

|      |             |                                                                                                                               |
|------|-------------|-------------------------------------------------------------------------------------------------------------------------------|
| 1440 | OSB11_HUMAN | R.SFSLASSSN[pS]PISQR.R                                                                                                        |
| 1441 | OSBP1_HUMAN | K.MLAE[pS]DE[pS]GDEESVSQTDKTELQNTLR.T                                                                                         |
| 1442 | OSBP1_HUMAN | K.M#LAE[pS]DE[pS]GDEESVSQTDKTELQNTLR.<br>T<br>R.GDAGPG[pS]GAA[pS]G[pT]VVAAAAGGPGPG<br>AGGVAAAGPAPAPP[pT]GGSGGSGAGGSGSAR.<br>E |
| 1443 | OSBP1_HUMAN | R.TLSNAEDYLDDDED[pS]D.-                                                                                                       |
| 1444 | OSTF1_HUMAN | K.LNLLHS[pY]MNVTWIRIPSE[pT]RAPLAQPESP                                                                                         |
| 1445 | OTU7A_HUMAN | TASAGEDVQSLADSLSDR.D<br>-                                                                                                     |
| 1446 | OTX1_HUMAN  | .M#M#[pS]YLKQPPYGMNGLGLAGPAM#DLLHP[<br>pS]VGYPATPRK.Q                                                                         |
| 1447 | OXSRI_HUMAN | K.TEDGGWEW[pS]DDEFDEESEEGKAAISQLR.S                                                                                           |
| 1448 | OXSRI_HUMAN | R.G[pY]DFKADIWSFGITAIELA[pT]GAAPYHK.Y                                                                                         |
| 1449 | P3C2A_HUMAN | K.E[pT]LRQR.E                                                                                                                 |
| 1450 | P3C2A_HUMAN | R.[pS]ADAG[pS]F[pS]PTPGQIGGAVKLSIS[pY]JRN<br>G[pT]LFIM#VMHIK.D                                                                |
| 1451 | P4K2A_HUMAN | R.VAAAAGSGP[pS]PPGSPGHDRER.Q                                                                                                  |
| 1452 | P4K2A_HUMAN | R.VAAAAGSGP[pS]PPG[pS]PGHDRER.Q                                                                                               |
| 1453 | PAGR1_HUMAN | R.DLFSLSEDPSPA[pS]PPLR.S                                                                                                      |
| 1454 | PAK2_HUMAN  | K.YL[pS]FTPPEKDGFPSTPALNAK.G                                                                                                  |
| 1455 | PALD_HUMAN  | R.IA[pS]DEEIQGTKDAVIQDLER.K                                                                                                   |
| 1456 | PAR1_HUMAN  | R.FV[pT]AAFYCNM#YASILLM#TVISIDRFLAVV<br>YPM#Q[pS]LSWR.T                                                                       |
| 1457 | PARD3_HUMAN | R.RS[pS]DPALIGLSTSVSDSNFSSEEPSR.K                                                                                             |
| 1458 | PAWR_HUMAN  | R.TDR[pS]GFPR.Y                                                                                                               |
| 1459 | PAXX_HUMAN  | R.LAAAEETAV[pS]PR.K                                                                                                           |
| 1460 | PAXX_HUMAN  | R.RLAAAEETAV[pS]PR.K                                                                                                          |
| 1461 | PBIR1_HUMAN | R.SNSAPLIHGL[pS]DTSPVFQAEAPSAR.R                                                                                              |
| 1462 | PBIR1_HUMAN | R.SN[pS]APLIHGLSDTSPVFQAEAPSAR.R                                                                                              |
| 1463 | PBIR1_HUMAN | R.SNSAPLIHGLSDT[pS]PVFQAEAPSAR.R                                                                                              |
| 1464 | PCBP1_HUMAN | K.QICLVMLETLSQ[pS]PQGR.V                                                                                                      |
| 1465 | PCBP1_HUMAN | R.VMTIPYQPMPAS[pS]PVICAGGQDR.C                                                                                                |
| 1466 | PCBP1_HUMAN | R.VM#TIPYQPMPAS[pS]PVICAGGQDR.C                                                                                               |
| 1467 | PCBP2_HUMAN | K.GVTIPYRPKPS[pS]SPVIFAGGQDR.Y                                                                                                |
| 1468 | PCBP2_HUMAN | K.GVTIPYRPKP[pS]SSPVIFAGGQDR.Y                                                                                                |
| 1469 | PCNP_HUMAN  | K.TLSVAAAFNEDED[pS]EPEEMPPEAK.M                                                                                               |
| 1470 | PCNP_HUMAN  | K.TLSVAAAFNEDED[pS]EPEEM#PPEAK.M                                                                                              |
| 1471 | PCY1A_HUMAN | K.AAAYDI[pS]EDEED.-                                                                                                           |
| 1472 | PCY1A_HUMAN | R.WPFSGK[pT]SPPC[pS]PANLSR.H                                                                                                  |

|      |             |                                                               |
|------|-------------|---------------------------------------------------------------|
| 1473 | PCY1A_HUMAN | R.WPFSGKT[pS]PPC[pS]PANLSR.H                                  |
| 1474 | PCY1A_HUMAN | R.WPF[pS]GKTSPPC[pS]PANLSR.H                                  |
| 1475 | PDCD4_HUMAN | R.FV[pS]EGDGGR.L                                              |
| 1476 | PDCD4_HUMAN | R.SGLTVPT[pS]PK.G                                             |
| 1477 | PDCD4_HUMAN | K.ATVLL[pS]MSKGGK.R                                           |
| 1478 | PDCD5_HUMAN | R.KVMD[pS]DEDDDY.-                                            |
| 1479 | PDCD5_HUMAN | R.KVM#D[pS]DEDDDY.-                                           |
| 1480 | PDE12_HUMAN | K.EAKPGAAEPEVGVPSLSLSPS[pS]PSSSWTETDV<br>EER.V                |
| 1481 | PDIA6_HUMAN | R.DGELPVEDDIDL[pS]DVELDDLKDEL.-                               |
| 1482 | PDLI5_HUMAN | R.ISNSATYSGSVAPAN[pS]ALGQTQPSDQDTLV<br>QR.A                   |
| 1483 | PDLI7_HUMAN | R.TEAPAPASSTPQEPWPGPTAP[pS]PTSRPPWAV<br>DPAFAER.Y             |
| 1484 | PERM_HUMAN  | R.RPFNV[pT]DVLTPAQLNVLSKSSGCAYQDVG<br>[pT]CPEQDK.Y            |
| 1485 | PESC_HUMAN  | R.GEDPGNLNE[pS]EEEEEDDNNEGDGDEEGEN<br>EEEEEDAEAG[pS]EKEEEAR.L |
| 1486 | PGRC1_HUMAN | K.EGEEPTVY[pS]DEEPPKDESAR.K                                   |
| 1487 | PGRC1_HUMAN | K.IVRGDQPAASGD[pS]DDDEPPPLPR.L                                |
| 1488 | PGRC1_HUMAN | K.LLKEGEEPTVY[pS]DEEPPKDESAR.K                                |
| 1489 | PGRC1_HUMAN | K.IVRGDQPAA[pS]GDSDDDEPPPLPR.L                                |
| 1490 | PGRC1_HUMAN | K.EGEEPTVY[pS]DEEPPKDESARK.N                                  |
| 1491 | PGRC2_HUMAN | R.LLKPGEEP[pS]EYTDEEDTKDHNKQD.-                               |
| 1492 | PGRC2_HUMAN | R.GLGAGAGAGEE[pS]PATSLPR.M                                    |
| 1493 | PGRC2_HUMAN | R.LLKPGEEPSEYTDEED[pT]KDHNKQD.-                               |
| 1494 | PGRC2_HUMAN | R.LLKPGEEPSEY[pT]DEEDTKDHNKQD.-                               |
| 1495 | PGRP4_HUMAN | K.GH[pS]P[pS]PAALSAM#ENLITYAVQKGHL[pS]<br>[pS][pS]YVQPLLK.G   |
| 1496 | PHF6_HUMAN  | K.TAHNSEADLEESFNEHELEPS[pS]PK.S                               |
| 1497 | PHIP_HUMAN  | R.[pT]CAPLAVLQGH[pS]A[pS]I[pT]SLQFSPLCSG[<br>pS]KR.Y          |
| 1498 | PHLA2_HUMAN | R.TAPAAPAEDAVAAAAAAPSEPSEP[pS]RPSQP<br>KPR.T                  |
| 1499 | PHLA2_HUMAN | R.TAPAAPAEDAVAAAAAAPSEPSEPSRP[pS]PQP<br>KPRTP.-               |
| 1500 | PHLA2_HUMAN | R.TAPAAPAEDAVAAAAAAPSEPSEPSRP[pS]PQP<br>KPR[pT]P.-            |
| 1501 | PININ_HUMAN | R.E[pS]EKQQDSQPVEEVMVLEMVENVK.H                               |
| 1502 | PININ_HUMAN | R.E[pS]RQESDPEDDDVKKPALQSSVATSK.E                             |
| 1503 | PININ_HUMAN | R.ESEKQQD[pS]QPVEEVMVLEMVENVK.H                               |

1504 PININ\_HUMAN R.ESRQE[pS]DPEDDDVKKPALQSSVVATSK.E  
1505 PKHH1\_HUMAN K.K[pT][pY][pY]L[pT]ADSPSLLEEWIRVLQSLK.  
V  
1506 PKN2\_HUMAN R.GREDVSNFDDEFTSEAPIL[pT]PPREPR.I  
1507 PKP3\_HUMAN R.LS[pS]AHNGGSAFGAAGYGGAQP[pT]PPMPTR  
PVSFHER.G  
1508 PLCD3\_HUMAN R.AL[pS]DREEEEEEDDEEEEEVEAAAQR.R  
1509 PLEC\_HUMAN K.AQLEPVA[pS]PAK.K  
1510 PLEC\_HUMAN R.SS[pS]VGSSSSYPISPAVSR.T  
1511 PLEC\_HUMAN R.SSSVGSSSSYPi[pS]PAVSR.T  
1512 PLEC\_HUMAN K.GYY[pS]PYSVSGSGSTAGSR.T  
1513 PLEC\_HUMAN R.SS[pS]VG[pS]SSSYPIPAVSR.T  
1514 PLEC\_HUMAN R.L[pT]VDEAVR.A  
1515 PNRC1\_HUMAN K.EN[pY]AGAKFSDPPSP[pS]VLPKPP[pS]HWM#G  
[pS]TVENSNQNR.E  
1516 PO210\_HUMAN R.DLAVPAAL[pT]PR.A  
1517 PO210\_HUMAN K.IQALDSEGNTFSTLAGLVFEW[pT]IVKDSEADR  
.F  
1518 PODXL\_HUMAN R.[pT]PTLPETM#SSSPTAASTTHRYPKTPSP[pT]V  
AHE[pS]NWAK.C  
1519 POTEE\_HUMAN K.DL[pY]TN[pT]VL[pS]GGTTM#[pY]PGM#AHRM  
#QKEIAALAPSMK.I  
-  
1520 PP14C\_HUMAN .M[pS]VA[pT]G[pS][pS]E[pT]AGGA[pS]GGGARVF  
FQ[pS]PRGGAGG[pS]PG[pS][pS]SGSGS[pS]R.E  
-  
1521 PP4P2\_HUMAN .MAADGVDER[pS]PLLSASHSGNVTPPTAPPYLQE  
S[pS]PRAELPPP[pY][pT]AIA[pS]PDA[pS]GIPVINC  
R.V  
1522 PPIL4\_HUMAN R.INHTVILDDPFDDPPDLLIPDR[pS]PEPTREQLD  
SGR.I  
-  
1523 PPM1H\_HUMAN .M#LTRVKSANFM#GGIM#AGSSGSEHGGGSC  
GG[pS]DLPLR.F  
1524 PR15A\_HUMAN R.EAT[pS]VPR.G  
1525 PR38A\_HUMAN R.VSALEEDMDDVE[pS][pS]EEEEEEDEKLER.V  
1526 PRC2C\_HUMAN K.AFGSGIDIKPG[pT]PPIAGR.S  
1527 PRC2C\_HUMAN K.AAGSP[pS]SSDQDEKLPQDESTAGTSEQNDIL  
K.V  
1528 PRP4B\_HUMAN K.LCDFGSASHVADNDITP[pY]LVSR.F  
1529 PRP4B\_HUMAN K.VQSGM#GLILQGYE[pS]G[pS]EEEGEIHEK.A

1530 PRP4B\_HUMAN R.RLS[pS]PR.T  
1531 PRP4B\_HUMAN K.[pY]LAEDSNM#SVPSEPSSPQSSTR[pT]R[pS]PS  
PDDILER.V  
1532 PRP4B\_HUMAN R.RL[pS]SPR.T  
1533 PRP4B\_HUMAN R.KK[pS]PIINESR.S  
1534 PSIP1\_HUMAN K.TGVTST[pS]D[pS]EEEGDDQEGEKKR.K  
1535 PSMD8\_HUMAN K.SGGLLAASRKMAAAAVNGAAGF[pS][pS][pS]G  
PAA[pT]SGAVLQAATGM#[pY]EQLK.G  
1536 PSME4\_HUMAN R.HAGVLGLGACVLSSP[pY]DVP[pT]WMPQLLM  
NL[pS]AHLNDPQPIEM#[pT]VKK.T  
1537 PSN1\_HUMAN R.AAVQELSS[pS]ILAGEDPEER.G  
1538 PTPRM\_HUMAN R.QEM#[pT]VM#VN[pS]MDK[pS][pY]AEQGTNCD  
EAFSFM#DTHNLNGRSVSSPSSF[pT]M#K.T  
1539 PTX4\_HUMAN R.EG[pY]EIPPGG[pS]LVLGQEOD[pS]VGGGFDDSS  
EAFVG[pS]M#[pS]GLAIWDR.A  
1540 PTX4\_HUMAN R.FREG[pY]EIPPGG[pS]LVLGQEOD[pS]VGGGFDD  
SSEAFVGSMP[pS]GLAIWDR.A  
1541 PUR4\_HUMAN K.C[pS]GNWMWAAKLPGEAALADACEAMVA  
VMAALGVAVDGGKDSLMS#AAR.V  
1542 PURB\_HUMAN R.DSLGDFIEHYAQLGPS[pS]PEQLAAGAEEGGGP  
R.R  
1543 PURB\_HUMAN R.DSLGDFIEHYAQLGP[pS]SPEQLAAGAEEGGGP  
R.R  
1544 PWP1\_HUMAN K.EKLQEEGGG[pS]DEEETGSPSEDGMQSAR.T  
1545 PYGO2\_HUMAN R.GGG[pT]PDANSLAPPGK.A  
1546 PYRG1\_HUMAN R.SGSS[pS]PDSEITELKFPSINHD.-  
1547 PYRG1\_HUMAN R.SGS[pS]SPDSEITELKFPSINHD.-  
1548 Q5JW53\_HUMAN R.IHLGS[pS]PK.K  
1549 Q5SR50\_HUMAN R.LHAED[pS]AP[pS]RM#IGVAM#PGLGVLPGLV  
QAPGDAEC[pS]RLLQILELGR.H  
-  
1550 Q5SRN1\_HUMAN .M#[pS]AAIAALAASYGSGSGSESD[pS]D[pS]E[pS]  
[pS]RCPLPAAD[pS]LM#HL[pT]K.S  
1551 Q5SXN9\_HUMAN -. [pY]TGGIKLER.D  
1552 Q5T5H1\_HUMAN R.KS[pS]LVTSK.L  
1553 Q5T757\_HUMAN K.KPIETG[pS]PK.T  
1554 Q5T757\_HUMAN K.KPIE[pT]GSPK.T  
1555 Q5T8R3\_HUMAN K.EIEGIFHA[pT][pT][pS]EVSWISSIM#LAVMYGG  
GPISSILVNK.Y  
1556 Q5TBG5\_HUMAN K.QM#LFRYQGYIGAALVLGGVDV[pT]GPHLYSI  
YPHG[pS][pT]DK.L

1557 Q5TEJ7\_HUMAN .M#WN[pS]NDGGGFES[pY]GSSSYGGAGG[pY]TQ  
 SPGGFGSPAPSQAEEK.K  
 1558 Q5VZU9\_HUMAN K.GDY[pT]IRLQIR.H  
 1559 Q5VZU9\_HUMAN K.GD[pY]TIRLQIR.H  
 -  
 1560 Q5Y7D1\_HUMAN .MVCLRLPGG[pS]CM#AVLTV[pT]LM#VL[pS][pS]  
 PLALAGD[pT]RPR.F  
 1561 Q8ND98\_HUMAN K.EIINAIDGIGGLGIGEGAPEIV[pT]GSRDGTVK.V  
 1562 R113A\_HUMAN R.ELDEGRYGVYEDENYEVG[pS]DDEEIPFK.C  
 1563 R4GMQ1\_HUMAN R.EMDESLANL[pS]EDEY[pY]SEEERNAK.A  
 -  
 1564 R4GMR7\_HUMAN .[pS][pT]VQCRKA[pS]FELYGADFVFGEDFQPWLI  
 EINA[pS]PTM#AP[pS][pT]AV[pT]AR.L  
 1565 R4GN01\_HUMAN R.GDT[pS]KRPYPRAGTALGFCLILSGPEEVFHK.  
 Y  
 1566 R4GN37\_HUMAN M.AAPSPSGGGGSGGGSGSG[pT]PGPVGSPAPGH  
 PAVSSM#QGK.R  
 1567 R4GN59\_HUMAN -.MHVYSLAEAPAGRM#IQ[pS]DK.G  
 -  
 1568 R4GN68\_HUMAN .M#AAPSPSGGGGSGGGSGSGTTPGPVGSPAPGHP  
 AV[pS]SM#QER.D  
 1569 RAD18\_HUMAN K.NDLQDTEI[pS]PR.Q  
 1570 RAF1\_HUMAN R.ST[pS]TPNVHMOVSTTLPVDSR.M  
 1571 RAGP1\_HUMAN R.KILDPNTGEPAPVLSSPPPADVSTFLAFP[pS]PE  
 K.L  
 1572 RAGP1\_HUMAN K.ILDPNTGEPAPVLSSPPPADVSTFLAFP[pS]PEK.  
 L  
 1573 RAI14\_HUMAN K.DRLSD[pS]TTGADSLDISSEADQQDLLSLLQA  
 K.V  
 1574 RALY\_HUMAN R.TRDDGDEEGLLTH[pS]EEEELEHSQDTDADDGA  
 LQ.-  
 1575 RALY\_HUMAN R.TRDDGDEEGLL[pT]HSEEELEHSQDTDADDGA  
 LQ.-  
 1576 RALY\_HUMAN R.TRDDGDEEGLL[pT]HSEEELEHSQD[pT]DADD  
 GALQ.-  
 1577 RALY\_HUMAN R.TRDDGDEEGLLTH[pS]EEEELEH[pS]QDTDADD  
 GALQ.-  
 1578 RALY\_HUMAN R.TRDDGDEEGLL[pT]H[pS]EEEELEHSQDTDADD  
 GALQ.-  
 1579 RALY\_HUMAN R.GRL[pS]PVPVPR.A



1580 RALY\_HUMAN R.TRDDGDEEGLL[pT]HSEEELEH[pS]QDTDADD  
GALQ.-  
1581 RALY\_HUMAN R.TRDDGDEEGLLTHSEEELEH[pS]QDTDADDGA  
LQ.-  
1582 RANB3\_HUMAN R.SAGG[pS]SPEGGED[pS]DREDGNYCPPVKR.E  
1583 RANB9\_HUMAN K.MVSS[pY]LVHHGYCATAEAFARS[pT]DQ[pT]V  
LEELASIKNR.Q  
1584 RB33A\_HUMAN R.KSM#VEHYRNVHAVVVFVYDV[pT]K.M  
1585 RBM10\_HUMAN K.LASDDRP[pS]PPR.G  
1586 RBM14\_HUMAN R.QP[pT]PPFFGR.D  
1587 RBM25\_HUMAN K.LGASN[pS]PGQPNSVK.R  
1588 RBM25\_HUMAN K.LGASN[pS]PGQPNSVKR.K  
1589 RBP2\_HUMAN K.VGEDEDG[pS]DEEVVHNEDIHFEPVSLPEVEV  
K.S  
1590 RBP2\_HUMAN K.SAL[pS]PSKSPAK.L  
1591 RBP2\_HUMAN K.ELVGPPLAETVFTPKT[pS]PENVQDR.F  
1592 RBP2\_HUMAN K.ELVGPPLAETVF[pT]PK[pT]SPENVQDR.F  
1593 RBP56\_HUMAN R.TDADSESDN[pS]DNNTIFVQGLGEGVSTDQVG  
EFFK.Q  
1594 RCAS1\_HUMAN R.KL[pS]GDQITLPTTVDYSSVPK.Q  
1595 RD23A\_HUMAN R.AVEYLLTGIPG[pS]PEPEHGVSQESQVSEQPAT  
EAAGENPLEFLR.D  
1596 REL2\_HUMAN R.QSEAADS[pS]PSELKYLGLD[pT]HSRK.K  
1597 REPS2\_HUMAN K.FRPENQATENQEP[pS][pT]AASGPASAATMKP  
HPTVQKQSSK.Q  
1598 RET3\_HUMAN R.ATVIGEPTAGGALSVGI[pY]QVGSSPLYASMP[  
pT]QM#AM#SATTGK.A  
1599 RETR2\_HUMAN R.QALD[pS]EEEEEDVAAK.E  
1600 RGL2\_HUMAN R.[pS]A[pS]CG[pS]PLSGGAEASGG[pT]G[pY]GG  
EG[pS]GPGA[pS]DCRIIR.V  
1601 RHG17\_HUMAN R.SP[pS]PPTQHTGQPPGQPSAPSQLSAPR.R  
1602 RHG17\_HUMAN R.SPSPPTQH[pT]GQPPGQPSAPSQLSAPR.R  
1603 RHG17\_HUMAN R.AESSSGGGTVPSSAGILEQGSPGDG[pS]PPKP  
K.D  
1604 RHG17\_HUMAN R.AESSSGGGTVPSSAGILEQGSPGDG[pS]PPKP  
KDPVSAVPAPGR.N  
1605 RHG17\_HUMAN R.[pS]PSPPTQHTGQPPGQPSAPSQLSAPR.R  
1606 RHG17\_HUMAN R.AESSSGGGTVPSSAGILEQGP[pS]PGDGSPPKP  
K.D  
1607 RHG35\_HUMAN R.TSFVSG[pS]DDELGPIR.K  
1608 RIF1\_HUMAN R.GQ[pS]PLAPLLE[pT]LEDP[pS]A[pS]HGGQTDA

YLTLTSRM#[pT]GEEGK.E  
 1609 RIPK2\_HUMAN R.M#M#SLSQSRS[pS]K[pS]APEGG[pT]IYMPPEN  
 YEPGQK.S  
 1610 RL14\_HUMAN K.AALLKA[pS]PK.K  
 1611 RL1D1\_HUMAN K.ATNE[pS]EDEIPQLVPIGK.K  
 1612 RLA0L\_HUMAN K.VEAKKEE[pS]EE[pS]DEDMGFGLFD.-  
 1613 RNPS1\_HUMAN R.AP[pS]PTKR.K  
 1614 RPA34\_HUMAN K.TVKQEQINTEPLEDTVL[pS]PTK.K  
 1615 RPAC2\_HUMAN K.I[pS]GLKTSMAEGER.K  
 1616 RPC8\_HUMAN K.GC[pS]PEGVHVSLGFFDDILIPPE[pS]LQQPAK.F  
 1617 RPRD2\_HUMAN R.GPTSTSIDNIDG[pT]PVRDER.S  
 1618 RPRD2\_HUMAN K.NTGVSPASRPSPGTPT[pS]PSNLTSGLK.T  
 R.ESLTLPSH[pS]LEHLGPPHGGGGGGG[pS]NSSS  
 1619 RPRD2\_HUMAN GPPLGPSHR.D  
 1620 RPTOR\_HUMAN R.VLDTSSLTQSAPA[pS]PTNK.G  
 -  
 1621 RPTOR\_HUMAN .ME[pS]EM#LQSPLLGLGEEDEADL[pT]DWNLPL  
 AFMK.K  
 1622 RRBP1\_HUMAN K.SHVEDGDIAGAPAS[pS]PEAPPAEQDPVQLK.T  
 R.FDVFQEEDSNSDYDLQQPAPGGSEVAP[pS]ML  
 1623 RSH4A\_HUMAN EI[pT]IQNAK.A  
 1624 RSRC2\_HUMAN K.EQSEVSV[pS]PR.A  
 1625 RTL9\_HUMAN K.SM#TAGGM#QMNSPTSDVMSTPTVRAWTSET  
 MS[pT]PLMR.T  
 1626 RTL9\_HUMAN R.TM#ASGLTSAQMAMTSGAMSTPLMTAQTS  
 G[pS][pT]STLLM#R.D  
 1627 RTL9\_HUMAN R.APASGEIATPLRSPA[pY]GAMSAPQM#TATA[p  
 S]GMM[pS]SMPQVK.A  
 1628 RTL9\_HUMAN R.D[pT]ASGAM#STSQMTATVSGGMSMPLMRAQ  
 DPGVMPASLM#R.A  
 1629 RTL9\_HUMAN R.A[pT]A[pS]GVM[pS]APPVRALD[pS]GAM#STPL  
 MGAPASGNM[pS][pT]LQK.T  
 1630 RTL9\_HUMAN R.DTASGAM#S[pT][pS]QM#[pT]A[pT]VSGGM#S  
 MPLMRAQDPGVMPASLM#R.A  
 1631 RU17\_HUMAN R.YDERPGP[pS]PLPHR.D  
 1632 RUN3B\_HUMAN K.QDTLNMSEGGKED[pT]P[pS]LLGLCG[pS]LTSV  
 ASYKSLTSLK.S  
 1633 S27A2\_HUMAN R.SEVTFSTPAL[pY]I[pY]TSG[pT]TGLPKAAM#IT  
 HQR.I  
 1634 S27A5\_HUMAN K.M#L[pS]L[pS]GATADDVV[pY]TVLPLYHVM#G  
 LVVGILGCLDLGATCVLAPK.F

1635 S27A5\_HUMAN K.M#[pS]CLLRM#L[pS]PFELVQFDM#EAAEPVRD  
NQGFCIPVGLGEPGLLL[pT]K.V  
1636 SAFB1\_HUMAN R.TDCEPVGLEPAVEQSSAASELAEASSEELAEAP  
TEAP[pS]PEAR.D  
1637 SAFB1\_HUMAN K.REPAEQPGDGERTDCEPVGLEPAVEQSSAAASE  
LAEASSEELAEAPTEAP[pS]PEAR.D  
1638 SAFB1\_HUMAN K.REPAEQPGDGERTDCEPVGLEPAVEQSSAAASE  
LAEAS[pS]EELAEAP[pT]EAPSPEAR.D  
1639 SAFB1\_HUMAN R.EPAEQPGDGERTDCEPVGLEPAVEQSSAAASEL  
AEASSEELAEAPTEAP[pS]PEAR.D  
1640 SAS10\_HUMAN K.TSAAACAVTDL[pS]DD[pS]DFDEKAK.L  
1641 SC5A2\_HUMAN R.GGVG[pS]PPPLTQEEAAAAAR.R  
1642 SC61B\_HUMAN M.PGPTPSGTNVGSSGR[pS]PSK.A  
1643 SC61B\_HUMAN M.PGPTPSGTNVGS[pS]GRSPSK.A  
1644 SC61B\_HUMAN M.PGPTPSGTNVGSSGRSP[pS]K.A  
1645 SC61B\_HUMAN M.PGPTPSG[pT]NVGSSGRSPSKAVAAR.A  
1646 SDE2\_HUMAN R.VVN[pT]DHGSPEQLQIPVTDSCR.H  
1647 SEC62\_HUMAN K.EELEQQ[pT]DGDCEEDEEEEENDGETPK.S  
1648 SEPT2\_HUMAN K.IYHLPDAE[pS]DEDEDFKEQTR.L  
1649 SET\_HUMAN K.RQ[pS]PLPPQK.K  
1650 SETD2\_HUMAN R.Q[pT]QWDPP[pT]WE[pS]PGDDASLEHEAEMDL  
GTPTYDENPM#K.A  
1651 SF01\_HUMAN R.TGDLGIPPNPEDR[pS]P[pS]PEPIYNSEGK.R  
1652 SF01\_HUMAN R.TGDLGIPPNPEDR[pS]P[pS]PEPIYNSEGK.R.L  
1653 SF01\_HUMAN R.TGDLGIPPNPEDR[pS]PSPEPI[pY]NSEGK.R  
1654 SF01\_HUMAN R.TGDLGIPPNPEDR[pS]PSPEPIYN[pS]EGK.R  
1655 SF3A1\_HUMAN K.FGESEEVEMEVE[pS]DEEDDKQEK.A  
1656 SF3A3\_HUMAN R.TGEEREEEEEQI[pS]E[pS]E[pS]EDEENEIINYNP  
K.N  
1657 SFR19\_HUMAN R.FDIYDPFHPTDEAY[pS]PPPAPPEQK.Y  
1658 SFR19\_HUMAN R.FDIYDPFHP[pT]DEAYSPPPAPPEQK.Y  
1659 SFR19\_HUMAN R.QR[pS]P[pS]PAPAPAPAAAAGPPTR.K  
1660 SH24A\_HUMAN R.TL[pS]SSAQEDIIR.W  
1661 SH3B4\_HUMAN R.[pS]YSLSELSVLQAKSDAPTSSTSSFFTGLK[pS]PA  
PEQFQ[pS]R.E  
1662 SH3G1\_HUMAN K.IAASS[pS]FR.S  
-  
1663 SHCBP\_HUMAN .M#ADGSL[pT]GGGLEAAAM#APERM#GWAVEQ  
ELASLEK.G  
1664 SHOX2\_HUMAN R.[pS][pS]PAVRAAGGGGGGGGGGGGGGGGGGGV  
GGGGAGGGAGGGR[pS]PVR.E

1665 SI1L1\_HUMAN K.LIDLE[pS]PTPESQK.S  
1666 SI1L1\_HUMAN R.TL[pS]DESIYNSQR.E  
1667 SIN3A\_HUMAN R.GDL[pS]DVEEEEEEMDVDEATGAVK.K  
1668 SKIV2\_HUMAN R.AS[pS]LEDLVLK.E  
1669 SLAP2\_HUMAN K.[pS]LP[pS]P[pS]L[pS][pS][pS]VQGQGPV[pT]M#  
EAER[pS]KA[pT]AVALGSFPAGGPAELSLR.L  
1670 SLN12\_HUMAN K.KQNESVSRAMCALLN[pS]GGGVK.A  
1671 SLTM\_HUMAN R.AGAGM#ITQHSSNA[pS]PINR.I  
1672 SMAP\_HUMAN R.SA[pS]PDDDLGSSNWEAADLGNEER.K  
1673 SMAP\_HUMAN R.SA[pS]PDDDLGSSNWEAADLGNEERK.Q  
1674 SMAP\_HUMAN K.RSASPDDDLGS[pS]NWEAADLGNEER.K  
1675 SMAP\_HUMAN K.R[pS]ASPDDDLGSSNWEAADLGNEER.K  
1676 SMC4\_HUMAN R.TE[pS]PATAAETASEELDNR.S  
1677 SMC4\_HUMAN R.TESPA[pT]AAETASEELDNR.S  
1678 SMC4\_HUMAN R.RREEGPPPP[pS]PDGA[pS]SDAEPEPPSGR.T  
1679 SMC4\_HUMAN R.[pT]ESPATAAETASEELDNR.S  
1680 SMC4\_HUMAN R.RREEGPPPPSPDGA[pS]SDAEPEPPSGR.T  
1681 SMC4\_HUMAN R.RREEGPPPPSPDGAS[pS]DAEPEPPSGR.T  
1682 SMC4\_HUMAN R.RREEGPPPP[pS]PDGAS[pS]DAEPEPPSGR.T  
1683 SMC4\_HUMAN R.RREEGPPPP[pS]PDGASSDAEPEPP[pS]GR.T  
1684 SMCA5\_HUMAN K.TPT[pS]PLK.M  
1685 SMCA5\_HUMAN K.GGPEGVAAQAVASAASAGPADAEMEEIFDDA[  
pS]PGKQK.E  
1686 SMRC1\_HUMAN R.KH[pS]P[pS]PPPPTPTESR.K  
1687 SMRC2\_HUMAN K.TLTDEVN[pS]PDSDRR.D  
1688 SMRC2\_HUMAN K.TFNKDTVIIV[pS]EP[pS]EDEESQGLPTMAR.R  
1689 SMRC2\_HUMAN K.TFNKDTVIIV[pS]EPSEDEE[pS]QGLPTM#AR.R  
1690 SMRC2\_HUMAN K.TFNKDTVIIV[pS]EP[pS]EDEESQGLPTM#AR.R  
1691 SO1B7\_HUMAN K.MVEQQYGWSA[pS]K[pT]NFLLGVLALPAVAIG  
M#FSGG[pY]IIK.K  
1692 SO4C1\_HUMAN R.CN[pT]PGGFLLHYCLLAV[pT]QGIVVNGLVNI[  
pS]I[pS][pT]VEK.R  
1693 SON\_HUMAN K.EMEHNTVCAAGT[pS]PVGEIGEEK.I  
1694 SON\_HUMAN K.EM#EHNTVCAAGT[pS]PVGEIGEEK.I  
1695 SON\_HUMAN K.DTEEPLPVKESDQTLAALL[pS]PK.E  
1696 SORL\_HUMAN K.ENVH[pS]WLILQVNA[pT]DALGVPCCTENDYKL  
WSPSDER.G  
-  
1697 SOX1\_HUMAN .M[pY]SM#MMETDLHSPGGAQAP[pT]NLSGPAG  
AGGGGGGGGGGGGGGGGAKANQDR.V  
1698 SOX3\_HUMAN K.SSANAAGGANSGGGSSGGASGGGGGTDQDR

VKRPM#NAFMVW[pS]R.G  
R.YDM#AGLQY[pS]PM#MPPGAQ[pS]YMNVAAA  
1699 SOX3\_HUMAN AAAA[pS]GYGGMAPSATAAAAAAYGQQPATAA  
AAAAAAAAMSLGPMGSVVK.S  
1700 SOX4\_HUMAN K.GDKVGGSGGGGHGGGGGGSSNAGGGGGGA  
[pS]GGGANSKPAQK.K  
1701 SOX4\_HUMAN K.GDKVGG[pS]GGGGHGGGGGGSSNAGGGGG  
GA[pS]GGGANSKPAQKK.S  
1702 SOX4\_HUMAN K.GDKVGG[pS]GGGGHGGGGGGG[pS][pS]NAGG  
GGGGASGGGANSKPAQK.K  
1703 SPAS2\_HUMAN R.[pY]QSAPSQAPGN[pT]IERGQ[pT]H[pS]AGTNG  
TGVSM#EPSPTPSFK.K  
1704 SPT5H\_HUMAN R.DVTNFTVGGFAPM[pS]PR.I  
1705 SPT6H\_HUMAN R.KQQRTP[pT]YIK.R  
1706 SQSTM\_HUMAN R.LTPV[pS]PESSSTEEK.S  
1707 SQSTM\_HUMAN R.SRL[pT]PVSPESSTEEK.S  
1708 SQSTM\_HUMAN R.SRLTPV[pS]PESSSTEEK.S  
1709 SQSTM\_HUMAN R.SRL[pT]PV[pS]PESSSTEEK.S  
1710 SQSTM\_HUMAN K.EVDPSTGELQSLQMPSEGP[pS]SLDPSQEGPT  
GLK.E  
1711 SQSTM\_HUMAN K.EVDPSTGELQSLQM#PE[pS]EGPSSLDPSQEGP  
TGLK.E  
1712 SQSTM\_HUMAN K.EVDPSTGELQSLQMPE[pS]EGPSSLDPSQEGPT  
GLK.E  
1713 SQSTM\_HUMAN K.EVDPSTGELQSLQM#PESEGPSSLDPSQEGP[pT  
]GLK.E  
1714 SRC8\_HUMAN K.TQTPPVSPAPQPTTEERLPS[pS]PVYEDAASF.K.A  
1715 SRC8\_HUMAN K.TQ[pT]PPVSPAPQPTTEERLPSPV[pY]EDAASF.K  
.A  
1716 SRC8\_HUMAN K.TQ[pT]PPV[pS]PAPQPTTEERLPSPVYEDAASF.K  
.A  
1717 SRC8\_HUMAN K.TQ[pT]PPV[pS]PAPQPTTEERLPSPV[pY]EDAAS  
FK.A  
1718 SRC8\_HUMAN R.AKTQ[pT]PPVSPAPQPTTEERLPSPVYEDAASF  
K.A  
1719 SRC8\_HUMAN R.AKTQTPPVSPAPQPTTEERLPSPVYEDAA[pS]F  
K.A  
1720 SRC8\_HUMAN K.[pT]QTPPVSPAPQPTTEERLPSPVYEDAASF.K.A  
1721 SRC8\_HUMAN K.TQTPPVSPAPQPTTEERLP[pS]SPVYEDAASF.K.A  
1722 SRC8\_HUMAN K.TQ[pT]PPV[pS]PAPQP[pT]EERLPSPVYEDAAS  
FK.A

|      |             |                                                                  |
|------|-------------|------------------------------------------------------------------|
| 1723 | SRC8_HUMAN  | R.AKTQ[pT]PPV[pS]PAPQPTEERLPSSPV[pY]EDA<br>ASFK.A                |
| 1724 | SRC8_HUMAN  | K.TQ[pT]PPVSPAPQPTEERLPSSPVYEDAASFK.A                            |
| 1725 | SRC8_HUMAN  | R.AKTQTPPVSPAPQP[pT]EERLPSSPVYEDAASF<br>K.A                      |
| 1726 | SRC8_HUMAN  | R.AKTQTPPV[pS]PAPQPTEERLPSSPVYEDAASF<br>K.A                      |
| 1727 | SRC8_HUMAN  | R.AKTQTPPV[pS]PAPQPTEERLPSSPV[pY]EDAA<br>SFK.A                   |
| 1728 | SRC8_HUMAN  | R.AKTQ[pT]PPV[pS]PAPQPTEERLPSSPVYEDA<br>SFK.A                    |
| 1729 | SRC8_HUMAN  | R.AKTQ[pT]PPVSPAPQPTEERLPSSPV[pY]EDAA<br>SFK.A                   |
| 1730 | SRC8_HUMAN  | R.AKTQ[pT]PPV[pS]PAPQP[pT]EERLPSSPVYEDA<br>ASFK.A                |
| 1731 | SRF_HUMAN   | K.ALIQTCLNSPD[pS]PPRSDPTTDQR.M                                   |
| 1732 | SRF_HUMAN   | M.LPTQAGAAAALGRGSALGGSLNRTP[pT]GRP<br>GGGGG[pT]R.G               |
|      |             | -                                                                |
| 1733 | SRF_HUMAN   | .M#LP[pT]QAGAAAALGRG[pS]ALGG[pS]LNR[pT]<br>]P[pT]GRPGGGGG[pT]R.G |
|      |             | -                                                                |
| 1734 | SRF_HUMAN   | .M#LPTQAGAAAALGRG[pS]ALGG[pS]LNR[pT]P[<br>pT]GRPGGGGGTR.G        |
| 1735 | SRFB1_HUMAN | K.AVTIAN[pS]PSKPSEKDSVVSLESQK.T                                  |
| 1736 | SRP72_HUMAN | K.TV[pS]SPPTSPRPGSAATVSASTSNIIPPR.H                              |
| 1737 | SRP72_HUMAN | K.TV[pS][pS]PPTSPRPGSAATVSASTSNIIPPR.H                           |
| 1738 | SRP72_HUMAN | K.TVS[pS]PP[pT]SPRPGSAATVSASTSNIIPPR.H                           |
| 1739 | SRP72_HUMAN | K.TVSSPP[pT][pS]PRPGSAATVSASTSNIIPPR.H                           |
| 1740 | SRP72_HUMAN | K.[pT]V[pS]SPPTSPRPGSAATVSASTSNIIPPR.H                           |
| 1741 | SRPK1_HUMAN | R.GSAPHSESDLPEQEEIILG[pS]DDDEQEDPN<br>DYCK.G                     |
| 1742 | SRRM1_HUMAN | K.AA[pS]P[pS]PQSVR.R                                             |
| 1743 | SRRM1_HUMAN | K.EK[pT]PELPEPSVK.V                                              |
| 1744 | SRRM1_HUMAN | R.HRP[pS]PPA[pT]PPPK.T                                           |
| 1745 | SRRM1_HUMAN | K.KETE[pS]EAEDNLDDLEK.H                                          |
| 1746 | SRRM1_HUMAN | K.KE[pT]E[pS]EAEDNLDDLEK.H                                       |
| 1747 | SRRM1_HUMAN | K.KPPAPP[pS]PVQSQSP[pS]TNWSPA<br>VPVK.K                          |
| 1748 | SRRM1_HUMAN | K.KPPAPP[pS]PVQSQSPS[pT]NWSPA<br>VPVK.K                          |
| 1749 | SRRM1_HUMAN | K.KPPAPP[pS]PVQSQ[pS]PSTNWSPA<br>VPVKK.A                         |
| 1750 | SRRM1_HUMAN | K.KPPAPP[pS]PVQ[pS]QSPSTNW[pS]PA<br>VPVKK.A                      |

|      |             |                                       |
|------|-------------|---------------------------------------|
| 1751 | SRRM1_HUMAN | K.AA[pS]PSPQSVR.R                     |
| 1752 | SRRM1_HUMAN | R.RY[pS]P[pS]PPPK.R                   |
| 1753 | SRRM1_HUMAN | K.NPD[pS]KMM#QINL[pT]GFLNGKNAR.E      |
| 1754 | SRRM1_HUMAN | K.KPPAPPSPVQ[pS]Q[pS]PSTNWSPA VPVK.K  |
| 1755 | SRRM1_HUMAN | K.KPPAPP[pS]PVQ[pS]QSPSTNWSPA VPVKK.A |
| 1756 | SRRM1_HUMAN | R.RY[pS]PPIQR.R                       |
| 1757 | SRRM1_HUMAN | R.RR[pT]P[pS]PPPR.R                   |
| 1758 | SRRM1_HUMAN | R.RR[pT]P[pT]PPPR.R                   |
| 1759 | SRRM1_HUMAN | K.RESP[pS]PAPKPR.K                    |
| 1760 | SRRM1_HUMAN | K.RE[pS]PSPAPKPR.K                    |
| 1761 | SRRM1_HUMAN | K.TRH[pS]PTPQQSNR.T                   |
| 1762 | SRRM1_HUMAN | K.KEK[pT]PELPEPSVK.V                  |
| 1763 | SRRM1_HUMAN | K.KE[pT]ESEAEDNLDDLEK.H               |
| 1764 | SRRM1_HUMAN | K.KPPAPP[pS]PVQSQSPSTNWSPA VPVK.K     |
| 1765 | SRRM1_HUMAN | K.KPPAPP[pS]PVQSQSPSTNW[pS]PA VPVK.K  |
| 1766 | SRRM1_HUMAN | K.KPPAPP[pS]PVQSQSPS[pT]NWSPA VPVKK.A |
| 1767 | SRRM1_HUMAN | K.KPPAPP[pS]PVQSQSP[pS]TNWSPA VPVKK.A |
| 1768 | SRRM2_HUMAN | K.AII[pS]PR.Q                         |
| 1769 | SRRM2_HUMAN | K.[pS]RLSLR.R                         |
| 1770 | SRRM2_HUMAN | K.SRL[pS]LR.R                         |
| 1771 | SRRM2_HUMAN | K.RVP[pS]PTPAPK.E                     |
| 1772 | SRRM2_HUMAN | R.SRA[pS]PA[pT]HR.R                   |
| 1773 | SRRM2_HUMAN | R.GEFSA[pS]PMLK.S                     |
| 1774 | SRRM2_HUMAN | K.TVAR[pT]PLGQR.S                     |
| 1775 | SRRM2_HUMAN | R.[pS]LSGS[pS]PCPK.Q                  |
| 1776 | SRRM2_HUMAN | R.SL[pS][pY]SPVER.R                   |
| 1777 | SRRM2_HUMAN | K.DGLPR[pT]PSRR.S                     |
| 1778 | SRRM2_HUMAN | R.YSHSGSS[pS]PDTK.V                   |
| 1779 | SRRM2_HUMAN | K.SS[pT]PPRQ[pS]PSR.S                 |
| 1780 | SRRM2_HUMAN | R.QSHSE[pS]PSLQSK.S                   |
| 1781 | SRRM2_HUMAN | R.SCFES[pS]PDPELK.S                   |
| 1782 | SRRM2_HUMAN | R.SSGHSSSEL[pS]PDAVEK.A               |
| 1783 | SRRM2_HUMAN | K.THTTALAGR[pS]P[pS]PASGR.R           |
| 1784 | SRRM2_HUMAN | K.[pS]STPPGESYFGVSSLQLK.G             |
| 1785 | SRRM2_HUMAN | K.SS[pT]PPGESYFGVSSLQLK.G             |
| 1786 | SRRM2_HUMAN | K.AGM#SSNQSI[pS]SPVLDAVPR.T           |
| 1787 | SRRM2_HUMAN | K.AQ[pT]PPGPSLSGSK[pS]PCPQEK.S        |
| 1788 | SRRM2_HUMAN | K.ELSN[pS]PLRENSFGSPLEFR.N            |
| 1789 | SRRM2_HUMAN | K.ELSN[pS]PLRENSFG[pS]PLEFR.N         |
| 1790 | SRRM2_HUMAN | K.VKAQ[pT]PPGPSLSGSK[pS]PCPQEK.S      |
| 1791 | SRRM2_HUMAN | K.AGMSSNQSI[pS]PVLDAVPR[pT]PSRER.S    |

1792 SRRM2\_HUMAN K.AGM#SSNQISIS[pS]PVLDAVPR[pT]PSRER.S  
1793 SRRM2\_HUMAN R.RGEGDAPFSEPGTTSTQRPS[pS]PETATK.Q  
1794 SRRM2\_HUMAN R.HGG[pS]PQPLATTPLSQEPVNPPSEASP[pT]R.D  
1795 SRRM2\_HUMAN K.SATRP[pS]P[pS]PERSSTGPEPPAPTLLAER.H  
1796 SRRM2\_HUMAN R.HGG[pS]PQPLA[pT]TPLSQEPVNPPSEASP[pT]R  
.D  
1797 SRRM2\_HUMAN R.MGQAPSQSLPPAQDQPR[pS]PVPSAFSDQSR.  
C  
1798 SRRM2\_HUMAN R.M#GQAPSQSLPPAQDQPRSPVP[pS]AFSDQSR.  
C  
1799 SRRM2\_HUMAN R.M#GQAPSQSLPPAQDQPRSPVPSAFSDQ[pS]R.  
C  
1800 SRRM2\_HUMAN R.M#GQAPSQSLPPAQDQPR[pS]PVPSAFSDQSR.  
C  
1801 SRRM2\_HUMAN K.SGM[pS]PEQSRFQSDSSSYPTVDSNSLLGQSR.L  
1802 SRRM2\_HUMAN R.SPGM#LEPLGSSR[pT]PM[pS]VLQQAGGSM#  
DGPGPRIPDHQR.T  
1803 SRRM2\_HUMAN K.SGM[pS]PEQSR.F  
1804 SRRM2\_HUMAN R.SCFE[pS][pS]PDPELK.S  
1805 SRRM2\_HUMAN K.EL[pS]NSPLRENSFGSPLEFR.N  
1806 SRRM2\_HUMAN R.GEGDAPFSEPGTTSTQRPSSE[pT]ATK.Q  
1807 SRRM2\_HUMAN K.TR[pT]PLR.Q  
1808 SRRM2\_HUMAN R.SRT[pS]PVTR.R  
1809 SRRM2\_HUMAN R.RP[pS]PQPSR.D  
1810 SRRM2\_HUMAN R.RRP[pS]PQPSR.D  
1811 SRRM2\_HUMAN R.QSHSSS[pS]PHPK.V  
1812 SRRM2\_HUMAN K.MALPPQEDATA[pS]PPRQK.D  
1813 SRRM2\_HUMAN K.M#ALPPQEDATA[pS]PPRQK.D  
1814 SRRM2\_HUMAN R.QGSITSPQANEQSV[pT]PQRR.S  
1815 SRRM2\_HUMAN K.VKPE[pT]PPRQ[pS]HSGSISPYPK.V  
1816 SRRM2\_HUMAN R.GEGDAPFSEPGTTSTQRPS[pS]PETATK.Q  
1817 SRRM2\_HUMAN R.HGGSPQPLATTPLSQEPVNPPSEA[pS]PTR.D  
1818 SRRM2\_HUMAN R.HGG[pS]PQPLATTPLSQEPVNPPSEA[pS]P[pT]R  
.D  
1819 SRRM2\_HUMAN R.HGG[pS]PQPLA[pT][pT]PLSQEPVNPPSEASP[pT]  
]R.D  
1820 SRRM2\_HUMAN K.SGMSPEQSRFQSD[pS]SSYPTVDSNSLLGQSR.L  
1821 SRRT\_HUMAN R.TQLWASEPGTPPLP[pT]SLPSQNPILK.N  
1822 SRRT\_HUMAN K.LIHTLDDRTQLWASEPG[pT]PPLPTSLPSQNPIL  
K.N  
1823 SRSF3\_HUMAN R.RR[pS]PPPR.R



|      |             |                                                                       |
|------|-------------|-----------------------------------------------------------------------|
| 1824 | SRSF6_HUMAN | R.SN[pS]PLPVPPSK.A                                                    |
| 1825 | SSR1_HUMAN  | M.FPNG[pT]A[pS]SPSSSPSP[pS]PG[pS]CGEGGG[pS]RGPGAGAADGMEEPGR.N         |
| 1826 | SSR2_HUMAN  | K.MITM#AVWGV[pS]LLVILPIMIYAGLR.S                                      |
| 1827 | STB5L_HUMAN | K.VLDGLTA[pS][pS]PGSGSSSGSNSGGGAGSGSVHPAGTAGVLR.E                     |
| 1828 | STMN1_HUMAN | R.ASGQAFELIL[pS]PR.S                                                  |
| 1829 | STMN1_HUMAN | R.SKESVPEFPL[pS]PPK.K                                                 |
| 1830 | STRN_HUMAN  | K.FLESAAADF[pS]DEDEDDDDVDGREK.S                                       |
| 1831 | STRP1_HUMAN | R.AA[pS]PPASASDLIEQQQK.R                                              |
| 1832 | STX5_HUMAN  | K.[pT]QVL[pS]PA[pT]AG[pS][pS][pS][pS]DIAPLPPVTLVPPPPD[pT]M#[pS]CRDR.T |
| 1833 | SUCO_HUMAN  | R.NNYASVECGAKILANPEAKS[pT][pS]AILIENM#DLYM#LNPCSTK.I                  |
| 1834 | SURF2_HUMAN | K.DLGSTEDGDG[pT]DDFLTDKEDEK.A                                         |
| 1835 | SYAP1_HUMAN | K.TQEDEEEIST[pS]PGVSEFVSDAFDACNLNQEDLRK.E                             |
| 1836 | SYEP_HUMAN  | K.EYIPGQPPLSQSSDS[pS]PTR.N                                            |
| 1837 | SYEP_HUMAN  | K.EYIPGQPPLSQ[pS][pS]DSSPTR.N                                         |
| 1838 | SYEP_HUMAN  | K.EYIPGQPPLSQS[pS]DSSPTRNSEPAGLETPEAK.V                               |
| 1839 | SYEP_HUMAN  | K.EYIPGQPPL[pS]Q[pS]SDSSPTRNSEPAGLETPEAK.V                            |
| 1840 | SYEP_HUMAN  | K.EYIPGQPPLSQSSDSSP[pT]RN[pS]EPAGLETPEAK.V                            |
| 1841 | SYEP_HUMAN  | K.EYIPGQPPLSQS[pS]DS[pS]PTR.N                                         |
| 1842 | SYEP_HUMAN  | K.EYIPGQPPLSQ[pS]SDSSPTRNSEPAGLETPEAK.V                               |
| 1843 | SYEP_HUMAN  | K.EYIPGQPPL[pS]QSSDSSPTRNSEPAGLETPEAK.V                               |
| 1844 | SYEP_HUMAN  | K.EYIPGQPPLSQSSDSSP[pT]RNSEPAGLETPEAK.V                               |
| 1845 | SYEP_HUMAN  | K.EYIPGQPPLSQS[pS]D[pS]SPTRNSEPAGLETPEAK.V                            |
| 1846 | SYEP_HUMAN  | K.EYIPGQPPLSQ[pS][pS]DSSPTRNSEPAGLETPEAK.V                            |
| 1847 | SYEP_HUMAN  | K.EYIPGQPPLSQSSDS[pS]PTRNSEPAGLETPEAK.V                               |
| 1848 | SYN1_HUMAN  | R.RRLSD[pS]NFM#ANLPNGYM#[pT]DLQRPQPPP<br>PPPGAHSFGATPGPGTATAER.S      |
| 1849 | SYNPO_HUMAN | R.AA[pS]PAKPSLDDLVPNLPK.G                                             |

1850 SYNPO\_HUMAN R.DRA[pS]PAAAEEVVPEWASCLK.S  
1851 SYNPO\_HUMAN K.VY[pS]EVHF[pT]LAKPP[pS]VVNR[pT]ARPFGI  
QAPGGTSQM#ER.S  
1852 T2FB\_HUMAN R.HYQGEEK[pS]D.-  
1853 TB182\_HUMAN R.ASRVP[pS][pS]DEEVVEEPQSR.R  
1854 TB182\_HUMAN R.TEAQDLCRA[pS]PEPPGPSSSR.W  
1855 TB182\_HUMAN R.LDSPPP[pS]PITEASEAAEAAEAGNLAVSSR.E  
1856 TB182\_HUMAN R.SFGTRPLS[pS]GFSPEEAQQQDEEFEK.K  
1857 TB182\_HUMAN R.SFGTRPL[pS]SGFSPEEAQQQDEEFEK.K  
1858 TBA1C\_HUMAN K.TIGGGDD[pS]FNTEFFSETGAGK.H  
1859 TBC15\_HUMAN R.ND[pS]PTQIPVSSDVCR.L  
1860 TBC9B\_HUMAN R.KASVVDPSTESSPAPQEGSEQPASPA[pS]PLSSR  
.Q  
1861 TBC9B\_HUMAN R.KASVVDPSTESSPAPQEGSEQPASPL[pS]SR  
.Q  
1862 TCAB1\_HUMAN R.EGDPVSLSTPLETEFG[pS]P[pS]ELSPR.I  
1863 TCAB1\_HUMAN R.VFPEPTE[pS]GDEGEELGLPLLSTR.H  
1864 TCAB1\_HUMAN R.EGDPVSLSTPLETEFGSPSEL[pS]PR.I  
1865 TCAB1\_HUMAN R.EGDPVSLSTPLETEFGSP[pS]EL[pS]PR.I  
1866 TCOF\_HUMAN K.TGGKEAASG[pT]TPQK.S  
1867 TCOF\_HUMAN K.SLGNILQAKPT[pS]SPAKGPPQK.A  
1868 TCOF\_HUMAN R.TQPSSGVDSAVGTLPATSPQ[pS]TSVQAK.G  
1869 TCOF\_HUMAN R.TQPSSGVDSAVGTLPAT[pS]PQSTSVQAK.G  
1870 TDIF2\_HUMAN K.SLTDPSQESHTEAI[pS]DAETSSSDISFSGIATR.  
R  
1871 TDIF2\_HUMAN R.QILAC[pS]PVSSVR.K  
1872 TENS3\_HUMAN R.WD[pS]YENLSADGEVLHTQGPVDGSLYAK.V  
1873 TF3C3\_HUMAN K.GKL[pS]AEENPDDSEVPSSSGINSTK.S  
1874 TF3C4\_HUMAN K.ILLVD[pS]PGMGNADDEQQEETSSK.Q  
1875 TFAP4\_HUMAN R.FIQELSGS[pS]PK.R  
1876 TFPT\_HUMAN R.RTPAPPEPG[pS]PAPGEGPSGR.K  
1877 TGF11\_HUMAN R.VQNHLPASGPTQPPVVSSTNEGSP[pS]PPEPTG  
K.G  
1878 TGO1\_HUMAN R.DLLPSGSRDEPPPASQSTSQDCSQALKQ[pS]P.-  
1879 THEGL\_HUMAN R.[pS]ELPIRPVPPAAMIAPSPR[pT]IALAK[pS]K.  
S  
1880 THEM4\_HUMAN K.RMVCLFQGGPYLEGPPGFIHGGAIAATMIDA[pT]  
VGM#CAM#M#AGGIVM#[pT]ANLNINYK.R  
1881 TIF1B\_HUMAN M.AA[pS]AAAASAAAA[pS]AASGSPGPGEGSAG  
GEKR.S  
1882 TIF1B\_HUMAN R.STAPSAAASASASAAAS[pS]PAGGGAEALELL

|      |             |                                                                    |
|------|-------------|--------------------------------------------------------------------|
|      |             | EHCGVCR.E                                                          |
| 1883 | TIF1B_HUMAN | R.STAPSAASASASAAA[pS]SPAGGGAEALELL<br>EHCGVCR.E                    |
| 1884 | TIF1B_HUMAN | R.LASPSGSTS[pS]GLEVVAVEGTSAPGGGPGTLD<br>DSATICR.V                  |
| 1885 | TIF1B_HUMAN | K.VFPGST[pT]JED[pY]NLIVIERGAAAAATGQPGT<br>APAG[pT]PGAPPLAGM#AIVK.E |
| 1886 | TJAP1_HUMAN | R.KD[pS]LTQAQEQGNLLN.-                                             |
| 1887 | TLS1_HUMAN  | R.VGDTEKPEPER[pS]PPNR.K                                            |
| 1888 | TLS1_HUMAN  | R.VGD[pT]EKPEPERSPPNR.K                                            |
| 1889 | TM1L1_HUMAN | K.EATNTTSEPSAPSQDLLDLSP[pS]PR.M                                    |
| 1890 | TM87A_HUMAN | K.WVEENVPSSVTDVALPALLD[pS]DEER.M                                   |
| 1891 | TM87A_HUMAN | K.AQEDDLKWVEENVPSSVTDVALPALLD[pS]DE<br>ER.M                        |
| 1892 | TMX1_HUMAN  | K.KVEEEQEADEEDV[pS]EEEEAESK.E                                      |
| 1893 | TMX1_HUMAN  | K.KVEEEQEADEEDV[pS]EEEEESKEGTNK.D                                  |
| 1894 | TMX1_HUMAN  | K.LLSESAQPLKKVEEEQEADEEDV[pS]EEEEAESK<br>.E                        |
| 1895 | TMX1_HUMAN  | K.VEEEQEADEEDV[pS]EEEEAESK.E                                       |
| 1896 | TNFB_HUMAN  | K.MHLAH[pS]TLKPA AHLIGDPSKQN[pS]LLWRA<br>N[pT]DR.A                 |
| 1897 | TOM1_HUMAN  | K.AADRLPNL[pS]SPSAEGPPGPPSGPAPR.K                                  |
| 1898 | TOP2A_HUMAN | K.SVVDLEADDVKGSVPL[pS]SSPPATHFPDETE<br>ITNPVPK.K                   |
| 1899 | TOP2A_HUMAN | K.IKNENTEG[pS]PQEDGVELEGLK.Q                                       |
| 1900 | TOP2B_HUMAN | K.K[pT]SFDQDSVDIFPSDFPTEPPSLPR.T                                   |
| 1901 | TOP2B_HUMAN | K.KTSFDQD[pS]DVDIFPSDFPTEPPSLPR.T                                  |
| 1902 | TOP2B_HUMAN | K.YTFDF[pS]EEEDDDADDDDDNNDLEELKVK.<br>A                            |
| 1903 | TP53B_HUMAN | R.STPFIVPS[pS]PTEQEGR.Q                                            |
| 1904 | TP53B_HUMAN | K.TSEIEPKN[pS]PEDLGLSLTGDSCK.L                                     |
| 1905 | TP53B_HUMAN | R.ETA VPGPLGIEDISP NL[pS]PDDKSFSR.V                                |
| 1906 | TP53B_HUMAN | K.MVIQGGS[pS]PQGEAMVTDVLEDQKEGR.S                                  |
| 1907 | TP53B_HUMAN | R.SD[pS]PEIPFQAAAGPSDGLDASSPGNSFVGLR.<br>V                         |
| 1908 | TP53B_HUMAN | K.GREETVAEDVCIDLTCDSGSQAVP[pS]PATR.S                               |
| 1909 | TP53B_HUMAN | R.RSD[pS]PEIPFQAAAGPSDGLDASSPGNSFVGL<br>R.V                        |
| 1910 | TP53B_HUMAN | R.GGPGKL[pS]PR.K                                                   |
| 1911 | TP53B_HUMAN | R.IDEDGENTQIEDTEPM[pS]PVLNSK.F                                     |
| 1912 | TP53B_HUMAN | K.MVIQGP[pS]SPQGEAMVTDVLEDQKEGR.S                                  |

1913 TP53B\_HUMAN K.MVIQGGS[pS]PQGEAM#VTDVLEDQKEGR.S  
1914 TP53B\_HUMAN K.MVIQGP[pS]SPQGEAM#VTDVLEDQKEGR.S  
1915 TP53B\_HUMAN R.ETAVPGPLGIEDI[pS]PNL[pS]PDDKSFSR.V  
1916 TPC10\_HUMAN K.V[pT]SISLPVAPAYHVIEFELEVL[pS]LP[pS]AP  
ALGGE[pS]DM#LGMAEPHR.K  
1917 TPR\_HUMAN R.TDGFAEAIH[pS]PQVAGVPR.F  
1918 TPR\_HUMAN R.AADSQNSGEGNTGAAES[pS]FSQEVVSREQQPS  
SASERQAPR.A  
1919 TPX2\_HUMAN K.SSDQPLTVPV[pS]PK.F  
1920 TRA2A\_HUMAN R.R[pS]P[pS]PYYSR.Y  
1921 TRAD1\_HUMAN R.ALPSLN[pT]GSSSPR.G  
1922 TRAD1\_HUMAN R.LDSQPQET[pS]PELPR.R  
1923 TRAD1\_HUMAN R.ALPSLNTGSS[pS]PR.G  
1924 TRAT1\_HUMAN K.M#QEA[pT]P[pS]AQATNETQM#CYASLDH[pS]  
VKGK.R  
1925 TRI35\_HUMAN K.KM#LASVESVPFSFDPN[pT]AAGWL[pS]V[pS]  
DDL[pT][pS]VTNHG[pY]RVQVENPER.F  
1926 TVA19\_HUMAN -.ML[pT]A[pS]LLRAVIASICVVS[pS]M#AQK.V  
1927 TXLNA\_HUMAN R.RPEGPGAQAPS[pS]PR.V  
1928 TXLNA\_HUMAN K.S[pS]PGQPEAGPEGAQERPSQAAPAVEAEGPG  
SSQAPR.K  
1929 TXLNA\_HUMAN K.QSNPKSSPGQPEAGPEGAQERP[pS]QAAPAVE  
AEGPGSSQAPR.K  
1930 U17L7\_HUMAN K.NHHPEQQ[pS][pS]LLNL[pS]STKPTDQESM#NT  
GTLASLQGSTRR.S  
1931 UBAP2\_HUMAN K.GGYAG[pS]SQAPNKSAGSGPGKGVSVSSSTTG  
LPDM#TGSVYNK.T  
1932 UBAP2\_HUMAN K.GGYAGSSQAPNKSAGSGPGKGV[pS]V[pS][pS]  
[pS]TTGLPDM#TGSV[pY]NK.T  
1933 UBAP2\_HUMAN K.GGYAGSSQAPNKSAGSGPGKGVSVSSSTTGLP  
DM#TG[pS]VYNK.T  
1934 UBE2O\_HUMAN K.TKSEAESASPEETPDG[pS]ASPVEMQDEGAEEP  
HEAGEQLPPFLK.E  
1935 UBE4B\_HUMAN R.SQSSEGVSSLSS[pS]PSNSLETQSQSLSR.S  
1936 UBN1\_HUMAN K.MPV[pS]QKL[pT]LVAPPGGPNGD[pS][pS]GGT  
QGVAKLLTSPSLKPSAVSSVTSSTSL[pS]K.G  
1937 UBN2\_HUMAN K.LTNSS[pS][pT]G[pT]VGKN[pS]L[pS]GIAM#NVP  
A[pS]RG[pS]NLN[pS]SGANR.T  
1938 UBP10\_HUMAN R.[pT]CNSPQNSTDSDIVPDSFPFGALGSDTR.T  
1939 UBP24\_HUMAN R.ATKM#LTA[pT]AM#PTVATSVQSP[pY]RSTK.L  
1940 UBP24\_HUMAN R.ATKM#L[pT]A[pT]AM#PTVATSVQSPYRSTK.L

|      |              |                                                            |
|------|--------------|------------------------------------------------------------|
| 1941 | UBP2L_HUMAN  | K.SPAVATSTAAPPPP[pS]SPLPSK.S                               |
| 1942 | UBP2L_HUMAN  | K.SPAVATSTAAPPPPSSPLP[pS]K.S                               |
| 1943 | UBP2L_HUMAN  | K.STSAPQMSPG[pS]SDNQSSSPQPAQQK.L                           |
| 1944 | UBP2L_HUMAN  | K.SPAVATSTAAPPPPS[pS]PLPSK.S                               |
| 1945 | UBP2L_HUMAN  | K.STSAPQM[pS]PGSSDNQSSSPQPAQQK.L                           |
| 1946 | UBP8_HUMAN   | R.SY[pS]SPDITQAIQEEER.K                                    |
| 1947 | UBXN1_HUMAN  | K.YGGSVGSQPPPV APEPGPVPS[pS]PSQEPPTKR.<br>E                |
| 1948 | UBXN1_HUMAN  | K.YGGSVGSQPPPV APEPGVPSSPSQEPPTKR.<br>E                    |
| 1949 | UBXN1_HUMAN  | K.YGGSVGSQPPPV APEPGVPSSP[pS]QEPPTKR.<br>E                 |
| 1950 | UIMC1_HUMAN  | K.SSETGAFRVP[pS]PGMEEAGCSR.E                               |
| 1951 | ULA1_HUMAN   | R.YPGV[pS]NYQVEEDIGK.L                                     |
| 1952 | UN93B_HUMAN  | R.YLEEDN[pS]DE[pS]DAEGEHGDGAE E E E APPAG<br>PRGPEPAGLGR.R |
| 1953 | UNG_HUMAN    | K.KAPAGQEEPG[pT]PPSSPLSAEQ LDR.I                           |
| 1954 | UNG_HUMAN    | R.HAPSPEPAVQG[pT]GVAGVPEESGDAAAIPAK.<br>K                  |
| 1955 | UNG_HUMAN    | R.HAP[pS]PEPAVQGTGVAGVPEESGDAAAIPAK.<br>K                  |
| 1956 | USO1_HUMAN   | K.DLGHPVEE E DELE[pS]GDQEDEDESEDPGKD<br>LDHI.-             |
| 1957 | UTP18_HUMAN  | R.VQEHED[pS]GD[pS]EVENEAK.G                                |
| 1958 | UTP18_HUMAN  | R.KT[pS]SDDE[pS]EEDEDDLQR.T                                |
| 1959 | UTP18_HUMAN  | R.KTS[pS]DDE[pS]EEDEDDLQR.T                                |
| 1960 | V9GYF0_HUMAN | R.LQDSSDPDTGSEEEGSSRL[pS]PPH[pS]PR.G                       |
| 1961 | V9GYK3_HUMAN | -.AGDLSKVP[pT]M#AL[pT]VGVG[pT]VM#DAR.E                     |
| 1962 | V9GYT7_HUMAN | R.IQVEQTRDEDLDTD[pS]LD.-<br>-                              |
| 1963 | VAMP1_HUMAN  | .M#SAPAQPPAEGTEGTAPGGGPPGPPPNMT[pS]<br>NRR.L               |
| 1964 | VAMP4_HUMAN  | R.NLLEDD[pS]DEEEDFFLR.G                                    |
| 1965 | VDAC1_HUMAN  | K.LTFDSSF[pS]PNTGKK.N                                      |
| 1966 | VDAC1_HUMAN  | K.LTFDSSF[pS]PNTGK.K                                       |
| 1967 | VIME_HUMAN   | R.SLYAS[pS]PGGVYATR.S                                      |
| 1968 | VIME_HUMAN   | R.DGQVINET[pS]QHHDDE.-                                     |
| 1969 | VINC_HUMAN   | K.GWLRDPSA[pS]PGDAGEQAIR.Q                                 |
| 1970 | VIR_HUMAN    | R.SFLSEP[pS]SPGRTK.T                                       |
| 1971 | VIR_HUMAN    | R.VISHDRD[pS]PPPPPPPPPPQPPSLK.R                            |
| 1972 | VPS4B_HUMAN  | K.EGQPSPADEKGN D[pS]DGEGESDDPEKK.K                         |

|      |              |                                                                                     |
|------|--------------|-------------------------------------------------------------------------------------|
| 1973 | VPS54_HUMAN  | K.L[pS]H[pY]LDIVEVNIAHQI[pS]LRSEAFFHAM#<br>T[pS]QHELQDYLR.K                         |
| 1974 | WAPL_HUMAN   | K.VEEESTGDPFGFD[pS]DDESLPVSSK.N                                                     |
| 1975 | WBP11_HUMAN  | R.MAGQEIPEEGREVEEF[pS]EDDDEDD[pS]DD[pS]EAEKQSQK.Q                                   |
| 1976 | WBP11_HUMAN  | R.M#AGQEIPEEGREVEEF[pS]EDDDEDD[pS]DD[pS]EAEKQSQK.Q                                  |
| 1977 | WBP11_HUMAN  | K.KLRE[pT]FER.I                                                                     |
| 1978 | WDFY3_HUMAN  | K.NSTAALYIDGQLVN[pT]VKLHYVH[pS][pT]PG<br>G[pS]GSANPPVVSTVYAYIGTPPAQR.Q              |
| 1979 | WDR3_HUMAN   | K.IKGSSPGIQD[pT]LEAEDGAFETDEAPEDR.I                                                 |
| 1980 | X6R5Z6_HUMAN | R.KGQK[pS]PR.F                                                                      |
| 1981 | X6RLN4_HUMAN | K.DGLNQTTPV[pS]PPSTTKPSR.E                                                          |
| 1982 | XPP2_HUMAN   | R.GEEQF[pS][pS]GP[pS]FETISASGLNAALAHYSP<br>[pT]KELNR.K                              |
| 1983 | YI001_HUMAN  | R.AGSSSPSSALRLCCAGPSQAHPGP[pS]PAVLPG<br>R.C                                         |
| 1984 | YJ006_HUMAN  | K.LSSTLITEM#S[pS]GRLEEL.-                                                           |
| 1985 | YRDC_HUMAN   | R.LFRPP[pS]PAPAAPGAR.L                                                              |
| 1986 | YTHD2_HUMAN  | R.GSGFGHNGVDGNGVVGQSQAGSGSTP[pS]EPHP<br>VLEKLR.S                                    |
| 1987 | ZBT7A_HUMAN  | R.VRGGAPDPSPGATATPGAPAQPS[pS]PDAR.R                                                 |
| 1988 | ZHX1_HUMAN   | R.N[pS]KSNQCLHLNNDSSSTTIIDSSDE[pT][pT]E[<br>pS]P[pT]VG[pT]AQPKQ[pS]WNPFPDF[pT]PQK.F |
| 1989 | ZMAT4_HUMAN  | K.[pT]PLKTTATPLSPLKPPRMDTAPVVA[pS]P[pY]<br>]QR.R                                    |
| 1990 | ZMYM4_HUMAN  | R.V[pT]QHESDNENEIQIQNK.L                                                            |
| 1991 | ZN281_HUMAN  | K.IGSGFLSGGGTG[pS]SGGSGSGGGGSGGGGG<br>GGSSGRRAEM#EPTFPQGM#VM#FNHR.L                 |
| 1992 | ZN638_HUMAN  | K.AAE[pS]MVKFYTCFPVLMMDGNQLSISMAPEN<br>MNIK.D                                       |
| 1993 | ZNT1_HUMAN   | K.STRPGS[pS]DINVAPGEQGPDQEETNTLVANTS<br>NSNGLKLDPADPENPR.S                          |
| 1994 | ZRAB2_HUMAN  | R.ENVEYIEREE[pS]DGEYDEFGR.K                                                         |
| 1995 | ZRAB2_HUMAN  | R.ENVEYIEREE[pS]DGEYDEFGRK.K                                                        |
| 1996 | ZRAB2_HUMAN  | R.TGYGGGFNERENVEYIEREE[pS]DGEYDEFGR.<br>K                                           |

[pS]/[pT]/[pY]: phosphorylation of S/T/Y, M#: oxidation of methionine.
